# Supplementary material for: Limitations of bacterial culture, viral PCR, and tulathromycin susceptibility from upper respiratory tract samples in predicting clinical outcome of tulathromycin control or treatment of bovine respiratory disease in high-risk feeder heifers
Source: PubMed Central journal article supplement (PMC8830659; doi:10.1371/journal.pone.0247213), 2022-02-10
Supplement: pone.0247213.s005.pdf [file pone.0247213.s005.pdf]

**PHASE IV ALL SPECIES STUDY BOVINE**  
**STUDY: A131R-US-13-231**  
**SUMMARY AND ANALYSIS**

**Addendum Section**

**Addendum  
Pages**

PHASE IV ALL SPECIES STUDY BOVINE

STUDY: A131R-US-13-231

TREATMENT SUCCESS RATE

|                                                                                      |         |
|--------------------------------------------------------------------------------------|---------|
| SUMMARY BY ANIMAL                                                                    | 1-57    |
| SUMMARY OF BACTERIAL ISOLATES                                                        | 58-61   |
| SUMMARY OF BACTERIAL ISOLATES BY TREATMENT SUCCESS                                   | 62-65   |
| SUMMARY OF VIRAL EXPOSURE AT FIRST PULL                                              | 66-69   |
| SUMMARY OF VIRAL EXPOSURE BY TREATMENT SUCCESS AT FIRST PULL                         | 70-73   |
| SUMMARY OF TIME OF ARRIVAL ON STUDY                                                  | 74      |
| SUMMARY OF TIME OF ARRIVAL ON STUDY BY TREATMENT SUCCESS                             | 75      |
| SUMMARY OF DAY 0 BODY WEIGHT BY TREATMENT SUCCESS                                    | 76      |
| SUMMARY OF MIC BY ANIMAL                                                             | 77-102  |
| SUMMARY BY RESISTANCE OF BACTERIAL ISOLATES AND PERIOD                               | 103     |
| SENSITIVITY, SPECIFICITY, POSITIVE PREDICTIVE VALUE AND NEGATIVE PREDICTIVE VALUE    | 104     |
| SUMMARY BY TIME OF ARRIVAL ON STUDY, RESISTANCE OF BACTERIAL ISOLATES AND PERIOD     | 105-107 |
| SUMMARY BY VIRAL EXPOSURE AND RESISTANCE OF BACTERIAL ISOLATES AT FIRST PULL         | 108-111 |
| SUMMARY BY SUSCEPTIBILITY OF BACTERIAL ISOLATES AND PERIOD                           | 112     |
| SENSITIVITY, SPECIFICITY, POSITIVE PREDICTIVE VALUE AND NEGATIVE PREDICTIVE VALUE    | 113     |
| SUMMARY BY TIME OF ARRIVAL ON STUDY, SUSCEPTIBILITY OF BACTERIAL ISOLATES AND PERIOD | 114-116 |
| SUMMARY BY VIRAL EXPOSURE AND SUSCEPTIBILITY OF BACTERIAL ISOLATES AT FIRST PULL     | 117-120 |
| SUMMARY OF MIC BY PERIOD                                                             | 121     |

PHASE IV ALL SPECIES STUDY BOVINE  
 STUDY: A131R-US-13-231  
 TREATMENT SUCCESS RATE  
 SUMMARY BY ANIMAL

09:30 Tuesday, October 27, 2015 1

treatment=T01 test material=DRAXXIN period=Arrival

| animal | day of study | day 0 date | day 0 weight (LBS) | histophilus somni | mannheimia haemolytica | mycoplasma bovis | pasteurella multocida | day of BRD | score | temperature (F) | day of removal | brd related | BRD mortality | treatment success [1] |
|--------|--------------|------------|--------------------|-------------------|------------------------|------------------|-----------------------|------------|-------|-----------------|----------------|-------------|---------------|-----------------------|
| 1      | 0            | 06MAR15    | 512                | N                 | N                      | N                | N                     |            |       |                 |                |             |               | YES                   |
| 10     | 0            | 06MAR15    | 474                | N                 | N                      | N                | N                     |            |       |                 |                |             |               | YES                   |
| 100    | 0            | 13MAR15    | 508                | N                 | N                      | N                | N                     | 9          | 1     | 103.7           | 13             | BRD         |               | NO                    |
| 1000   | 0            | 28MAR15    | 466                | N                 | N                      | N                | N                     |            |       |                 |                |             |               | YES                   |
| 1001   | 0            | 28MAR15    | 521                | N                 | N                      | N                | N                     |            |       |                 |                |             |               | YES                   |
| 1002   | 0            | 28MAR15    | 436                | N                 | N                      | N                | N                     |            |       |                 |                |             |               | YES                   |
| 1003   | 0            | 28MAR15    | 490                | N                 | N                      | N                | N                     |            |       |                 |                |             |               | YES                   |
| 1004   | 0            | 28MAR15    | 540                | N                 | N                      | N                | N                     | 19         | 2     | 106.3           |                |             |               | NO                    |
| 1005   | 0            | 28MAR15    | 565                | N                 | N                      | N                | N                     |            |       |                 |                |             |               | YES                   |
| 1006   | 0            | 28MAR15    | 450                | N                 | N                      | N                | N                     | 12         | 1     | 104.7           |                |             |               | NO                    |
| 1007   | 0            | 28MAR15    | 478                | N                 | N                      | N                | N                     |            |       |                 |                |             |               | YES                   |
| 1008   | 0            | 28MAR15    | 515                | N                 | N                      | N                | N                     |            |       |                 |                |             |               | YES                   |
| 1009   | 0            | 28MAR15    | 471                | N                 | N                      | N                | N                     | 25         | 2     | 106.0           | 28             | BRD         |               | NO                    |
| 101    | 0            | 13MAR15    | 556                | N                 | Y                      | N                | N                     | 10         | 1     | 105.5           | 18             | BRD         |               | NO                    |
| 1010   | 0            | 28MAR15    | 483                | N                 | N                      | N                | N                     |            |       |                 |                |             |               | YES                   |
| 1011   | 0            | 28MAR15    | 487                | N                 | Y                      | N                | N                     | 24         | 1     | 105.9           |                |             |               | NO                    |
| 1012   | 0            | 28MAR15    | 505                | N                 | N                      | N                | N                     |            |       |                 |                |             |               | YES                   |
| 1013   | 0            | 28MAR15    | 440                | N                 | N                      | Y                | N                     |            |       |                 |                |             |               | YES                   |
| 1014   | 0            | 28MAR15    | 488                | N                 | N                      | N                | N                     |            |       |                 |                |             |               | YES                   |
| 1015   | 0            | 28MAR15    | 480                | N                 | N                      | N                | N                     |            |       |                 |                |             |               | YES                   |
| 1016   | 0            | 28MAR15    | 468                | N                 | Y                      | N                | N                     | 37         | 1     | 105.5           | 40             | BRD         |               | NO                    |
| 1017   | 0            | 28MAR15    | 515                | N                 | N                      | N                | N                     |            |       |                 |                |             |               | YES                   |
| 1018   | 0            | 28MAR15    | 522                | N                 | N                      | N                | Y                     |            |       |                 |                |             |               | YES                   |
| 1019   | 0            | 28MAR15    | 536                | N                 | N                      | N                | N                     |            |       |                 |                |             |               | YES                   |
| 102    | 0            | 13MAR15    | 473                | N                 | N                      | N                | N                     | 7          | 1     | 105.3           |                |             |               | NO                    |
| 1020   | 0            | 28MAR15    | 551                | N                 | N                      | N                | N                     |            |       |                 |                |             |               | YES                   |
| 1021   | 0            | 28MAR15    | 513                | N                 | N                      | N                | N                     |            |       |                 |                |             |               | YES                   |
| 1022   | 0            | 28MAR15    | 434                | N                 | N                      | N                | N                     |            |       |                 |                |             |               | YES                   |
| 1023   | 0            | 28MAR15    | 552                | N                 | N                      | N                | N                     |            |       |                 |                |             |               | YES                   |
| 1024   | 0            | 28MAR15    | 484                | N                 | N                      | N                | N                     |            |       |                 |                |             |               | YES                   |
| 1025   | 0            | 28MAR15    | 525                | N                 | N                      | N                | N                     |            |       |                 |                |             |               | YES                   |
| 1026   | 0            | 28MAR15    | 454                | N                 | N                      | N                | N                     |            |       |                 |                |             |               | YES                   |
| 1027   | 0            | 28MAR15    | 457                | N                 | Y                      | N                | Y                     |            |       |                 |                |             |               | YES                   |
| 1028   | 0            | 28MAR15    | 424                | N                 | N                      | N                | N                     |            |       |                 |                |             |               | YES                   |

DATA HAVE NOT BEEN VERIFIED

[1] Did not qualify for BRD re-treatment, not a BRD mortality and not removed for non-BRD reasons

PHASE IV ALL SPECIES STUDY BOVINE  
 STUDY: A131R-US-13-231  
 TREATMENT SUCCESS RATE  
 SUMMARY BY ANIMAL

09:30 Tuesday, October 27, 2015 2

treatment=T01 test material=DRAXXIN period=Arrival

| animal | day of study | day 0 date | day 0 weight (LBS) | histophilus somni | mannheimia haemolytica | mycoplasma bovis | pasteurella multocida | day of BRD | score | temperature (F) | day of removal | brd related | BRD mortality | treatment success [1] |
|--------|--------------|------------|--------------------|-------------------|------------------------|------------------|-----------------------|------------|-------|-----------------|----------------|-------------|---------------|-----------------------|
| 1029   | 0            | 28MAR15    | 442                | N                 | N                      | N                | N                     |            |       |                 |                |             |               | YES                   |
| 103    | 0            | 13MAR15    | 577                | N                 | N                      | N                | Y                     |            |       |                 |                |             |               | YES                   |
| 1030   | 0            | 28MAR15    | 533                | N                 | N                      | N                | N                     | 11         | 1     | 105.6           | 19             | BRD         |               | NO                    |
| 1031   | 0            | 28MAR15    | 429                | N                 | N                      | N                | N                     |            |       |                 |                |             |               | YES                   |
| 1032   | 0            | 28MAR15    | 470                | N                 | N                      | N                | N                     | 14         | 1     | 106.2           |                |             |               | NO                    |
| 1033   | 0            | 28MAR15    | 487                | Y                 | N                      | N                | N                     | 16         | 1     | 105.4           |                |             |               | NO                    |
| 1034   | 0            | 28MAR15    | 497                | N                 | Y                      | N                | N                     | 37         | 1     | 103.6           |                |             |               | NO                    |
| 1035   | 0            | 28MAR15    | 456                | N                 | N                      | N                | N                     | 11         | 1     | 104.3           | 18             | BRD         |               | NO                    |
| 1036   | 0            | 28MAR15    | 439                | N                 | N                      | N                | N                     | 8          | 1     | 106.5           | 14             | BRD         |               | NO                    |
| 1037   | 0            | 28MAR15    | 437                | N                 | N                      | N                | N                     | 11         | 1     | 105.9           | 14             | BRD         |               | NO                    |
| 1038   | 0            | 28MAR15    | 471                | N                 | N                      | N                | N                     |            |       |                 |                |             |               | YES                   |
| 1039   | 0            | 28MAR15    | 446                | N                 | N                      | N                | N                     |            |       |                 |                |             |               | YES                   |
| 104    | 0            | 13MAR15    | 548                | N                 | N                      | N                | N                     | 12         | 1     | 104.6           |                |             |               | NO                    |
| 1040   | 0            | 28MAR15    | 574                | N                 | N                      | N                | N                     |            |       |                 |                |             |               | YES                   |
| 105    | 0            | 13MAR15    | 523                | N                 | N                      | N                | N                     | 7          | 1     | 104.9           | 15             | BRD         |               | NO                    |
| 106    | 0            | 13MAR15    | 484                | N                 | N                      | N                | N                     |            |       |                 |                |             |               | YES                   |
| 107    | 0            | 13MAR15    | 518                | N                 | N                      | N                | N                     |            |       |                 |                |             |               | YES                   |
| 108    | 0            | 13MAR15    | 453                | N                 | N                      | N                | N                     | 8          | 1     | 103.7           | 35             | BRD         |               | NO                    |
| 109    | 0            | 13MAR15    | 440                | N                 | N                      | N                | N                     |            |       |                 |                |             |               | YES                   |
| 11     | 0            | 06MAR15    | 438                | N                 | N                      | N                | Y                     | 10         | 1     | 103.5           |                |             |               | NO                    |
| 110    | 0            | 13MAR15    | 456                | N                 | N                      | N                | Y                     | 9          | 1     | 104.9           | 17             | BRD         |               | NO                    |
| 111    | 0            | 13MAR15    | 553                | N                 | N                      | N                | N                     |            |       |                 |                |             |               | YES                   |
| 112    | 0            | 13MAR15    | 551                | N                 | Y                      | N                | N                     | 11         | 1     | 105.3           |                |             |               | NO                    |
| 113    | 0            | 13MAR15    | 543                | N                 | N                      | N                | N                     | 12         | 1     | 107.0           | 19             | BRD         |               | NO                    |
| 114    | 0            | 13MAR15    | 559                | N                 | N                      | N                | N                     | 14         | 1     | 104.4           |                |             |               | NO                    |
| 115    | 0            | 13MAR15    | 493                | N                 | Y                      | N                | N                     | 7          | 1     | 104.6           | 13             | BRD         |               | NO                    |
| 116    | 0            | 13MAR15    | 455                | N                 | N                      | N                | N                     | 7          | 1     | 103.6           |                |             |               | NO                    |
| 117    | 0            | 13MAR15    | 447                | N                 | N                      | N                | Y                     | 12         | 1     | 103.6           |                |             |               | NO                    |
| 118    | 0            | 13MAR15    | 570                | N                 | N                      | N                | N                     | 7          | 1     | 106.4           |                |             |               | NO                    |
| 119    | 0            | 13MAR15    | 545                | N                 | N                      | N                | Y                     |            |       |                 |                |             |               | YES                   |
| 12     | 0            | 06MAR15    | 447                | N                 | N                      | N                | N                     | 7          | 1     | 103.5           |                |             |               | NO                    |
| 120    | 0            | 13MAR15    | 507                | N                 | N                      | N                | N                     | 15         | 1     | 108.5           |                |             |               | NO                    |
| 121    | 0            | 13MAR15    | 460                | N                 | N                      | N                | N                     |            |       |                 |                |             |               | YES                   |
| 122    | 0            | 13MAR15    | 514                | N                 | N                      | N                | N                     |            |       |                 |                |             |               | YES                   |

DATA HAVE NOT BEEN VERIFIED

[1] Did not qualify for BRD re-treatment, not a BRD mortality and not removed for non-BRD reasons

PHASE IV ALL SPECIES STUDY BOVINE  
 STUDY: A131R-US-13-231  
 TREATMENT SUCCESS RATE  
 SUMMARY BY ANIMAL

09:30 Tuesday, October 27, 2015 3

treatment=T01 test material=DRAXXIN period=Arrival

| animal | day of study | day 0 date | day 0 weight (LBS) | histophilus somni | mannheimia haemolytica | mycoplasma bovis | pasteurella multocida | day of BRD | score | temperature (F) | day of removal | brd related | BRD mortality | treatment success [1] |
|--------|--------------|------------|--------------------|-------------------|------------------------|------------------|-----------------------|------------|-------|-----------------|----------------|-------------|---------------|-----------------------|
| 123    | 0            | 13MAR15    | 549                | N                 | N                      | N                | N                     |            |       |                 |                |             |               | YES                   |
| 124    | 0            | 13MAR15    | 536                | N                 | N                      | N                | N                     | 28         | 1     | 103.5           |                |             |               | NO                    |
| 125    | 0            | 13MAR15    | 469                | N                 | N                      | N                | N                     |            |       |                 |                |             |               | YES                   |
| 126    | 0            | 13MAR15    | 450                | N                 | N                      | N                | N                     |            |       |                 |                |             |               | YES                   |
| 127    | 0            | 13MAR15    | 440                | N                 | N                      | N                | N                     | 12         | 1     | 104.5           | 39             | BRD         |               | NO                    |
| 128    | 0            | 13MAR15    | 510                | N                 | Y                      | N                | N                     | 14         | 1     | 105.2           | 23             | BRD         |               | NO                    |
| 129    | 0            | 13MAR15    | 525                | N                 | N                      | N                | N                     |            |       |                 |                |             |               | YES                   |
| 13     | 0            | 06MAR15    | 502                | N                 | N                      | N                | N                     |            |       |                 |                |             |               | YES                   |
| 130    | 0            | 13MAR15    | 590                | N                 | N                      | N                | N                     | 11         | 1     | 105.4           | 13             | BRD         |               | NO                    |
| 131    | 0            | 13MAR15    | 524                | N                 | N                      | N                | Y                     |            |       |                 |                |             |               | YES                   |
| 132    | 0            | 13MAR15    | 533                | N                 | N                      | N                | N                     | 14         | 1     | 106.3           | 34             | BRD         |               | NO                    |
| 133    | 0            | 13MAR15    | 532                | N                 | N                      | N                | N                     | 11         | 1     | 107.1           |                |             |               | NO                    |
| 134    | 0            | 13MAR15    | 482                | N                 | N                      | N                | N                     |            |       |                 |                |             |               | YES                   |
| 135    | 0            | 13MAR15    | 474                | N                 | N                      | N                | N                     |            |       |                 |                |             |               | YES                   |
| 136    | 0            | 13MAR15    | 549                | N                 | N                      | N                | Y                     | 10         | 1     | 103.9           |                |             |               | NO                    |
| 137    | 0            | 13MAR15    | 540                | N                 | N                      | N                | N                     | 12         | 1     | 105.0           | 26             | BRD         |               | NO                    |
| 138    | 0            | 13MAR15    | 452                | N                 | N                      | N                | N                     |            |       |                 |                |             |               | YES                   |
| 139    | 0            | 13MAR15    | 498                | N                 | N                      | N                | N                     | 12         | 1     | 105.8           | 17             | BRD         |               | NO                    |
| 14     | 0            | 06MAR15    | 536                | N                 | N                      | N                | N                     |            |       |                 |                |             |               | YES                   |
| 140    | 0            | 13MAR15    | 476                | N                 | Y                      | N                | N                     | 12         | 1     | 104.5           | 28             | BRD         |               | NO                    |
| 141    | 0            | 13MAR15    | 539                | N                 | N                      | N                | N                     | 11         | 1     | 103.5           | 40             | BRD         |               | NO                    |
| 142    | 0            | 13MAR15    | 462                | N                 | N                      | N                | N                     | 12         | 1     | 103.5           |                |             |               | NO                    |
| 143    | 0            | 13MAR15    | 445                | N                 | N                      | N                | N                     |            |       |                 |                |             |               | YES                   |
| 144    | 0            | 13MAR15    | 514                | N                 | Y                      | N                | N                     | 10         | 1     | 105.1           |                |             |               | NO                    |
| 145    | 0            | 13MAR15    | 565                | N                 | N                      | N                | N                     |            |       |                 |                |             |               | YES                   |
| 146    | 0            | 13MAR15    | 467                | N                 | N                      | N                | N                     | 13         | 1     | 104.2           |                |             |               | NO                    |
| 147    | 0            | 13MAR15    | 502                | N                 | N                      | N                | N                     | 17         | 2     | 105.2           |                |             |               | NO                    |
| 148    | 0            | 13MAR15    | 563                | N                 | N                      | N                | N                     | 7          | 1     | 103.6           | 16             | BRD         |               | NO                    |
| 149    | 0            | 13MAR15    | 510                | N                 | Y                      | N                | N                     | 12         | 1     | 103.5           |                |             |               | NO                    |
| 15     | 0            | 06MAR15    | 530                | N                 | N                      | Y                | N                     |            |       |                 |                |             |               | YES                   |
| 151    | 0            | 13MAR15    | 550                | N                 | N                      | N                | N                     | 7          | 1     | 104.0           |                |             |               | NO                    |
| 152    | 0            | 13MAR15    | 444                | N                 | N                      | N                | N                     |            |       |                 |                |             |               | YES                   |
| 153    | 0            | 13MAR15    | 523                | N                 | N                      | N                | N                     |            |       |                 |                |             |               | YES                   |
| 154    | 0            | 13MAR15    | 533                | N                 | N                      | N                | N                     | 13         | 1     | 106.1           |                |             |               | NO                    |

DATA HAVE NOT BEEN VERIFIED

[1] Did not qualify for BRD re-treatment, not a BRD mortality and not removed for non-BRD reasons

PHASE IV ALL SPECIES STUDY BOVINE  
 STUDY: A131R-US-13-231  
 TREATMENT SUCCESS RATE  
 SUMMARY BY ANIMAL

09:30 Tuesday, October 27, 2015 4

treatment=T01 test material=DRAXXIN period=Arrival

| animal | day of study | day 0 date | day 0 weight (LBS) | histophilus somni | mannheimia haemolytica | mycoplasma bovis | pasteurella multocida | day of BRD | score | temperature (F) | day of removal | brd related | BRD mortality | treatment success [1] |
|--------|--------------|------------|--------------------|-------------------|------------------------|------------------|-----------------------|------------|-------|-----------------|----------------|-------------|---------------|-----------------------|
| 155    | 0            | 13MAR15    | 475                | N                 | N                      | N                | N                     | 13         | 1     | 103.7           |                |             |               | NO                    |
| 156    | 0            | 13MAR15    | 431                | N                 | N                      | N                | N                     | 8          | 1     | 103.8           |                |             |               | NO                    |
| 158    | 0            | 13MAR15    | 512                | N                 | Y                      | N                | N                     |            |       |                 |                |             |               | YES                   |
| 159    | 0            | 13MAR15    | 541                | N                 | N                      | N                | N                     | 11         | 1     | 106.4           | 36             | BRD         |               | NO                    |
| 16     | 0            | 06MAR15    | 460                | N                 | N                      | N                | N                     |            |       |                 |                |             |               | YES                   |
| 160    | 0            | 13MAR15    | 549                | N                 | Y                      | N                | Y                     | 7          | 1     | 103.5           | 14             | BRD         |               | NO                    |
| 161    | 0            | 13MAR15    | 560                | N                 | N                      | N                | Y                     |            |       |                 |                |             |               | YES                   |
| 162    | 0            | 13MAR15    | 503                | N                 | N                      | N                | N                     |            |       |                 |                |             |               | YES                   |
| 163    | 0            | 13MAR15    | 499                | N                 | Y                      | N                | N                     | 11         | 1     | 106.2           | 18             | BRD         |               | NO                    |
| 164    | 0            | 13MAR15    | 429                | N                 | N                      | N                | Y                     | 12         | 1     | 103.7           | 20             | BRD         |               | NO                    |
| 165    | 0            | 13MAR15    | 501                | N                 | Y                      | Y                | N                     | 8          | 1     | 104.7           | 17             | BRD         |               | NO                    |
| 166    | 0            | 13MAR15    | 568                | N                 | Y                      | N                | N                     | 8          | 1     | 104.7           | 16             | BRD         |               | NO                    |
| 167    | 0            | 13MAR15    | 569                | N                 | Y                      | Y                | N                     | 18         | 1     | 106.5           |                |             |               | NO                    |
| 168    | 0            | 13MAR15    | 480                | N                 | N                      | N                | N                     |            |       |                 |                |             |               | YES                   |
| 169    | 0            | 13MAR15    | 548                | N                 | N                      | N                | N                     | 13         | 1     | 104.7           |                |             |               | NO                    |
| 17     | 0            | 06MAR15    | 486                | N                 | N                      | N                | N                     | 14         | 2     | 101.3           |                |             |               | NO                    |
| 170    | 0            | 13MAR15    | 487                | N                 | N                      | N                | N                     |            |       |                 |                |             |               | YES                   |
| 171    | 0            | 13MAR15    | 524                | N                 | Y                      | N                | N                     | 10         | 1     | 104.0           | 16             | BRD         |               | NO                    |
| 172    | 0            | 13MAR15    | 448                | N                 | N                      | N                | N                     | 9          | 1     | 103.9           | 18             | BRD         |               | NO                    |
| 173    | 0            | 13MAR15    | 520                | N                 | Y                      | Y                | N                     |            |       |                 |                |             |               | YES                   |
| 174    | 0            | 13MAR15    | 436                | N                 | N                      | N                | Y                     | 12         | 1     | 104.0           |                |             |               | NO                    |
| 175    | 0            | 13MAR15    | 546                | N                 | N                      | N                | N                     | 8          | 1     | 105.5           | 11             | BRD         |               | NO                    |
| 176    | 0            | 13MAR15    | 450                | N                 | N                      | N                | N                     |            |       |                 |                |             |               | YES                   |
| 177    | 0            | 13MAR15    | 507                | N                 | N                      | N                | Y                     | 8          | 1     | 104.8           | 30             | BRD         |               | NO                    |
| 178    | 0            | 13MAR15    | 479                | N                 | Y                      | N                | N                     |            |       |                 |                |             |               | YES                   |
| 179    | 0            | 13MAR15    | 542                | N                 | N                      | N                | Y                     | 17         | 1     | 106.0           | 35             | BRD         |               | NO                    |
| 18     | 0            | 06MAR15    | 505                | N                 | Y                      | N                | N                     |            |       |                 |                |             |               | YES                   |
| 180    | 0            | 13MAR15    | 552                | N                 | N                      | N                | N                     |            |       |                 |                |             |               | YES                   |
| 181    | 0            | 13MAR15    | 478                | N                 | N                      | N                | N                     | 17         | 1     | 108.2           |                |             |               | NO                    |
| 182    | 0            | 13MAR15    | 511                | N                 | N                      | N                | N                     |            |       |                 |                |             |               | YES                   |
| 183    | 0            | 13MAR15    | 500                | N                 | Y                      | N                | N                     |            |       |                 |                |             |               | YES                   |
| 184    | 0            | 13MAR15    | 517                | N                 | N                      | N                | N                     | 7          | 1     | 104.5           | 13             | BRD         |               | NO                    |
| 185    | 0            | 13MAR15    | 534                | N                 | N                      | N                | N                     |            |       |                 |                |             |               | YES                   |
| 186    | 0            | 13MAR15    | 490                | N                 | N                      | N                | N                     |            |       |                 |                |             |               | YES                   |

DATA HAVE NOT BEEN VERIFIED

[1] Did not qualify for BRD re-treatment, not a BRD mortality and not removed for non-BRD reasons

PHASE IV ALL SPECIES STUDY BOVINE  
 STUDY: A131R-US-13-231  
 TREATMENT SUCCESS RATE  
 SUMMARY BY ANIMAL

09:30 Tuesday, October 27, 2015 5

treatment=T01 test material=DRAXXIN period=Arrival

| animal | day of study | day 0 date | day 0 weight (LBS) | histophilus somni | mannheimia haemolytica | mycoplasma bovis | pasteurella multocida | day of BRD | score | temperature (F) | day of removal | brd related | BRD mortality | treatment success [1] |
|--------|--------------|------------|--------------------|-------------------|------------------------|------------------|-----------------------|------------|-------|-----------------|----------------|-------------|---------------|-----------------------|
| 187    | 0            | 13MAR15    | 471                | N                 | N                      | N                | N                     | 7          | 1     | 104.7           |                |             |               | NO                    |
| 188    | 0            | 13MAR15    | 540                | N                 | N                      | N                | N                     | 34         | 1     | 105.0           |                |             |               | NO                    |
| 189    | 0            | 13MAR15    | 508                | N                 | Y                      | N                | N                     |            |       |                 |                |             |               | YES                   |
| 19     | 0            | 06MAR15    | 465                | N                 | N                      | N                | N                     |            |       |                 |                |             |               | YES                   |
| 190    | 0            | 13MAR15    | 556                | N                 | Y                      | N                | N                     |            |       |                 |                |             |               | YES                   |
| 191    | 0            | 13MAR15    | 436                | N                 | N                      | N                | N                     | 13         | 1     | 103.8           | 21             | BRD         |               | NO                    |
| 192    | 0            | 13MAR15    | 474                | N                 | N                      | N                | N                     | 7          | 1     | 105.0           | 10             | BRD         |               | NO                    |
| 193    | 0            | 13MAR15    | 486                | N                 | N                      | N                | N                     |            |       |                 |                |             |               | YES                   |
| 194    | 0            | 13MAR15    | 515                | N                 | N                      | N                | N                     |            |       |                 |                |             |               | YES                   |
| 195    | 0            | 13MAR15    | 546                | N                 | N                      | N                | N                     | 14         | 1     | 105.0           |                |             |               | NO                    |
| 196    | 0            | 13MAR15    | 535                | N                 | N                      | N                | N                     |            |       |                 |                |             |               | YES                   |
| 197    | 0            | 13MAR15    | 527                | N                 | N                      | N                | N                     |            |       |                 |                |             |               | YES                   |
| 198    | 0            | 13MAR15    | 489                | N                 | Y                      | N                | N                     |            |       |                 |                |             |               | YES                   |
| 199    | 0            | 13MAR15    | 554                | N                 | N                      | N                | Y                     |            |       |                 |                |             |               | YES                   |
| 2      | 0            | 06MAR15    | 436                | N                 | Y                      | N                | N                     |            |       |                 |                |             |               | YES                   |
| 20     | 0            | 06MAR15    | 438                | N                 | N                      | N                | Y                     | 11         | 1     | 103.7           | 24             | BRD         |               | NO                    |
| 200    | 0            | 13MAR15    | 477                | N                 | N                      | N                | N                     | 40         | 1     | 104.6           |                |             |               | NO                    |
| 201    | 0            | 13MAR15    | 470                | N                 | N                      | N                | N                     | 7          | 1     | 104.7           |                |             |               | NO                    |
| 202    | 0            | 13MAR15    | 575                | N                 | N                      | N                | N                     | 18         | 1     | 104.0           |                |             |               | NO                    |
| 203    | 0            | 13MAR15    | 496                | N                 | Y                      | N                | N                     | 25         | 2     | 104.6           | 30             | BRD         |               | NO                    |
| 204    | 0            | 13MAR15    | 616                | N                 | N                      | N                | N                     |            |       |                 |                |             |               | YES                   |
| 205    | 0            | 13MAR15    | 475                | N                 | Y                      | N                | N                     |            |       |                 |                |             |               | YES                   |
| 206    | 0            | 13MAR15    | 476                | N                 | N                      | N                | N                     |            |       |                 |                |             |               | YES                   |
| 207    | 0            | 13MAR15    | 514                | N                 | N                      | N                | N                     |            |       |                 |                |             |               | YES                   |
| 208    | 0            | 13MAR15    | 507                | N                 | N                      | N                | N                     |            |       |                 |                |             |               | YES                   |
| 209    | 0            | 13MAR15    | 545                | N                 | Y                      | N                | N                     | 7          | 1     | 103.8           | 12             | BRD         |               | NO                    |
| 21     | 0            | 06MAR15    | 436                | N                 | N                      | N                | N                     |            |       |                 |                |             |               | YES                   |
| 210    | 0            | 13MAR15    | 426                | N                 | N                      | N                | N                     |            |       |                 |                |             |               | YES                   |
| 211    | 0            | 13MAR15    | 512                | N                 | Y                      | N                | Y                     |            |       |                 |                |             |               | YES                   |
| 212    | 0            | 13MAR15    | 483                | N                 | N                      | N                | N                     | 13         | 1     | 106.2           |                |             |               | NO                    |
| 213    | 0            | 13MAR15    | 546                | N                 | N                      | N                | N                     | 25         | 2     | 106.0           |                |             |               | NO                    |
| 214    | 0            | 13MAR15    | 475                | N                 | N                      | N                | Y                     | 11         | 1     | 106.3           |                |             |               | NO                    |
| 215    | 0            | 13MAR15    | 482                | N                 | N                      | N                | N                     | 7          | 1     | 104.0           | 19             | BRD         |               | NO                    |
| 216    | 0            | 13MAR15    | 530                | N                 | N                      | N                | N                     |            |       |                 |                |             |               | YES                   |

DATA HAVE NOT BEEN VERIFIED

[1] Did not qualify for BRD re-treatment, not a BRD mortality and not removed for non-BRD reasons

PHASE IV ALL SPECIES STUDY BOVINE  
 STUDY: A131R-US-13-231  
 TREATMENT SUCCESS RATE  
 SUMMARY BY ANIMAL

09:30 Tuesday, October 27, 2015 6

treatment=T01 test material=DRAXXIN period=Arrival

| animal | day of study | day 0 date | day 0 weight (LBS) | histophilus somni | mannheimia haemolytica | mycoplasma bovis | pasteurella multocida | day of BRD | score | temperature (F) | day of removal | brd related | BRD mortality | treatment success [1] |
|--------|--------------|------------|--------------------|-------------------|------------------------|------------------|-----------------------|------------|-------|-----------------|----------------|-------------|---------------|-----------------------|
| 217    | 0            | 13MAR15    | 516                | N                 | N                      | N                | N                     | 7          | 1     | 103.5           |                |             |               | NO                    |
| 218    | 0            | 13MAR15    | 473                | N                 | N                      | N                | N                     |            |       |                 |                |             |               | YES                   |
| 219    | 0            | 13MAR15    | 584                | N                 | N                      | N                | N                     |            |       |                 |                |             |               | YES                   |
| 22     | 0            | 06MAR15    | 466                | N                 | N                      | N                | N                     | 13         | 1     | 104.6           | 20             | BRD         |               | NO                    |
| 220    | 0            | 13MAR15    | 478                | N                 | N                      | N                | N                     |            |       |                 |                |             |               | YES                   |
| 221    | 0            | 13MAR15    | 486                | N                 | N                      | N                | N                     | 19         | 2     | 105.3           |                |             |               | NO                    |
| 222    | 0            | 13MAR15    | 490                | N                 | N                      | Y                | Y                     | 8          | 1     | 105.6           |                |             |               | NO                    |
| 223    | 0            | 13MAR15    | 473                | N                 | N                      | N                | N                     |            |       |                 |                |             |               | YES                   |
| 224    | 0            | 13MAR15    | 540                | N                 | N                      | N                | N                     |            |       |                 |                |             |               | YES                   |
| 225    | 0            | 13MAR15    | 494                | N                 | Y                      | N                | N                     |            |       |                 |                |             |               | YES                   |
| 226    | 0            | 13MAR15    | 525                | N                 | N                      | N                | N                     |            |       |                 |                |             |               | YES                   |
| 227    | 0            | 13MAR15    | 499                | N                 | N                      | N                | N                     | 18         | 1     | 103.5           |                |             |               | NO                    |
| 228    | 0            | 13MAR15    | 442                | N                 | N                      | N                | N                     |            |       |                 |                |             |               | YES                   |
| 229    | 0            | 13MAR15    | 542                | N                 | N                      | N                | Y                     |            |       |                 |                |             |               | YES                   |
| 23     | 0            | 06MAR15    | 570                | N                 | N                      | N                | N                     |            |       |                 |                |             |               | YES                   |
| 230    | 0            | 13MAR15    | 570                | N                 | N                      | N                | Y                     |            |       |                 |                |             |               | YES                   |
| 231    | 0            | 13MAR15    | 461                | N                 | N                      | N                | N                     |            |       |                 |                |             |               | YES                   |
| 232    | 0            | 13MAR15    | 508                | N                 | N                      | N                | N                     | 14         | 1     | 104.0           | 20             | BRD         |               | NO                    |
| 233    | 0            | 13MAR15    | 450                | N                 | N                      | N                | N                     |            |       |                 |                |             |               | YES                   |
| 234    | 0            | 13MAR15    | 482                | N                 | N                      | N                | N                     | 20         | 1     | 104.3           | 29             | BRD         |               | NO                    |
| 235    | 0            | 13MAR15    | 416                | N                 | N                      | N                | N                     |            |       |                 |                |             |               | YES                   |
| 236    | 0            | 13MAR15    | 531                | N                 | N                      | N                | N                     |            |       |                 |                |             |               | YES                   |
| 237    | 0            | 13MAR15    | 547                | N                 | Y                      | N                | N                     |            |       |                 |                |             |               | YES                   |
| 238    | 0            | 13MAR15    | 446                | N                 | N                      | N                | Y                     | 7          | 1     | 103.5           | 17             | BRD         |               | NO                    |
| 239    | 0            | 13MAR15    | 448                | N                 | N                      | N                | N                     | 14         | 2     | 104.0           |                |             |               | NO                    |
| 24     | 0            | 06MAR15    | 562                | N                 | N                      | N                | N                     | 7          | 1     | 103.5           | 12             | BRD         |               | NO                    |
| 240    | 0            | 13MAR15    | 570                | N                 | N                      | N                | N                     |            |       |                 |                |             |               | YES                   |
| 241    | 0            | 13MAR15    | 473                | N                 | N                      | N                | N                     |            |       |                 |                |             |               | YES                   |
| 242    | 0            | 13MAR15    | 458                | N                 | N                      | N                | N                     |            |       |                 |                |             |               | YES                   |
| 243    | 0            | 13MAR15    | 427                | N                 | N                      | N                | N                     |            |       |                 |                |             |               | YES                   |
| 244    | 0            | 13MAR15    | 507                | N                 | Y                      | N                | N                     |            |       |                 |                |             |               | YES                   |
| 245    | 0            | 13MAR15    | 546                | N                 | N                      | N                | N                     |            |       |                 |                |             |               | YES                   |
| 246    | 0            | 13MAR15    | 558                | N                 | N                      | N                | N                     |            |       |                 |                |             |               | YES                   |
| 247    | 0            | 13MAR15    | 534                | N                 | N                      | N                | N                     | 8          | 1     | 103.5           | 27             | BRD         |               | NO                    |

DATA HAVE NOT BEEN VERIFIED

[1] Did not qualify for BRD re-treatment, not a BRD mortality and not removed for non-BRD reasons

PHASE IV ALL SPECIES STUDY BOVINE  
 STUDY: A131R-US-13-231  
 TREATMENT SUCCESS RATE  
 SUMMARY BY ANIMAL

09:30 Tuesday, October 27, 2015 7

treatment=T01 test material=DRAXXIN period=Arrival

| animal | day of study | day 0 date | day 0 weight (LBS) | histophilus somni | mannheimia haemolytica | mycoplasma bovis | pasteurella multocida | day of BRD | score | temperature (F) | day of removal | brd related | BRD mortality | treatment success [1] |
|--------|--------------|------------|--------------------|-------------------|------------------------|------------------|-----------------------|------------|-------|-----------------|----------------|-------------|---------------|-----------------------|
| 248    | 0            | 13MAR15    | 532                | N                 | Y                      | N                | N                     | 17         | 2     | 107.0           |                |             |               | NO                    |
| 249    | 0            | 13MAR15    | 491                | N                 | N                      | N                | N                     |            |       |                 |                |             |               | YES                   |
| 25     | 0            | 06MAR15    | 568                | N                 | N                      | N                | N                     |            |       |                 |                |             |               | YES                   |
| 250    | 0            | 13MAR15    | 500                | N                 | N                      | N                | N                     | 25         | 2     | 106.5           |                |             |               | NO                    |
| 251    | 0            | 13MAR15    | 508                | N                 | N                      | N                | N                     |            |       |                 |                |             |               | YES                   |
| 252    | 0            | 13MAR15    | 457                | N                 | N                      | N                | Y                     |            |       |                 |                |             |               | YES                   |
| 253    | 0            | 13MAR15    | 503                | N                 | N                      | N                | Y                     |            |       |                 |                |             |               | YES                   |
| 254    | 0            | 13MAR15    | 480                | N                 | N                      | N                | N                     |            |       |                 |                |             |               | YES                   |
| 255    | 0            | 13MAR15    | 450                | N                 | N                      | N                | N                     | 18         | 1     | 105.5           |                |             |               | NO                    |
| 256    | 0            | 13MAR15    | 540                | N                 | N                      | N                | N                     | 29         | 1     | 104.5           |                |             |               | NO                    |
| 257    | 0            | 13MAR15    | 568                | N                 | N                      | N                | N                     |            |       |                 |                |             |               | YES                   |
| 258    | 0            | 13MAR15    | 480                | N                 | N                      | N                | N                     | 18         | 1     | 106.2           | 28             | BRD         |               | NO                    |
| 259    | 0            | 13MAR15    | 510                | N                 | N                      | N                | N                     |            |       |                 |                |             |               | YES                   |
| 26     | 0            | 06MAR15    | 502                | N                 | N                      | N                | N                     | 7          | 1     | 104.6           |                |             |               | NO                    |
| 260    | 0            | 13MAR15    | 557                | N                 | N                      | N                | N                     |            |       |                 |                |             |               | YES                   |
| 261    | 0            | 13MAR15    | 574                | N                 | N                      | N                | N                     |            |       |                 |                |             |               | YES                   |
| 262    | 0            | 13MAR15    | 500                | N                 | N                      | N                | N                     | 12         | 2     | 104.7           | 19             | BRD         |               | NO                    |
| 263    | 0            | 13MAR15    | 512                | N                 | Y                      | N                | N                     |            |       |                 |                |             |               | YES                   |
| 264    | 0            | 13MAR15    | 533                | N                 | N                      | N                | N                     | 21         | 1     | 107.0           | 28             | BRD         |               | NO                    |
| 265    | 0            | 13MAR15    | 435                | N                 | N                      | N                | N                     | 20         | 1     | 106.1           | 30             | BRD         |               | NO                    |
| 266    | 0            | 13MAR15    | 552                | N                 | N                      | N                | N                     | 21         | 1     | 105.5           |                |             |               | NO                    |
| 268    | 0            | 13MAR15    | 560                | N                 | Y                      | N                | N                     | 18         | 1     | 104.5           |                |             |               | NO                    |
| 269    | 0            | 13MAR15    | 556                | N                 | N                      | N                | N                     |            |       |                 |                |             |               | YES                   |
| 27     | 0            | 06MAR15    | 477                | N                 | N                      | N                | N                     |            |       |                 |                |             |               | YES                   |
| 270    | 0            | 13MAR15    | 485                | N                 | N                      | N                | N                     |            |       |                 |                |             |               | YES                   |
| 271    | 0            | 13MAR15    | 527                | N                 | N                      | N                | N                     | 21         | 1     | 105.8           | 28             | BRD         |               | NO                    |
| 272    | 0            | 13MAR15    | 463                | N                 | N                      | N                | Y                     | 33         | 1     | 105.2           |                |             |               | NO                    |
| 273    | 0            | 13MAR15    | 511                | N                 | N                      | N                | N                     |            |       |                 |                |             |               | YES                   |
| 274    | 0            | 13MAR15    | 556                | N                 | N                      | N                | N                     |            |       |                 |                |             |               | YES                   |
| 275    | 0            | 13MAR15    | 492                | N                 | N                      | N                | N                     | 23         | 1     | 106.6           | 25             | BRD         |               | NO                    |
| 276    | 0            | 13MAR15    | 501                | N                 | N                      | N                | Y                     |            |       |                 |                |             |               | YES                   |
| 277    | 0            | 13MAR15    | 480                | N                 | N                      | N                | N                     | 19         | 1     | 106.3           |                |             |               | NO                    |
| 278    | 0            | 13MAR15    | 564                | N                 | N                      | N                | N                     | 21         | 1     | 104.0           |                |             |               | NO                    |
| 279    | 0            | 13MAR15    | 539                | N                 | N                      | N                | N                     |            |       |                 |                |             |               | YES                   |

DATA HAVE NOT BEEN VERIFIED

[1] Did not qualify for BRD re-treatment, not a BRD mortality and not removed for non-BRD reasons



PHASE IV ALL SPECIES STUDY BOVINE  
 STUDY: A131R-US-13-231  
 TREATMENT SUCCESS RATE  
 SUMMARY BY ANIMAL

treatment=T01 test material=DRAXXIN period=Arrival

| animal | day of study | day 0 date | day 0 weight (LBS) | histophilus somni | mannheimia haemolytica | mycoplasma bovis | pasteurella multocida | day of BRD | score | temperature (F) | day of removal | brd related | BRD mortality | treatment success [1] |
|--------|--------------|------------|--------------------|-------------------|------------------------|------------------|-----------------------|------------|-------|-----------------|----------------|-------------|---------------|-----------------------|
| 28     | 0            | 06MAR15    | 506                | N                 | N                      | N                | Y                     |            |       |                 |                |             |               | YES                   |
| 280    | 0            | 13MAR15    | 591                | N                 | N                      | N                | N                     | 17         | 1     | 106.4           | 24             | BRD         |               | NO                    |
| 281    | 0            | 13MAR15    | 521                | N                 | N                      | N                | N                     |            |       |                 |                |             |               | YES                   |
| 282    | 0            | 13MAR15    | 501                | N                 | N                      | N                | N                     |            |       |                 |                |             |               | YES                   |
| 283    | 0            | 13MAR15    | 510                | N                 | Y                      | N                | Y                     |            |       |                 |                |             |               | YES                   |
| 284    | 0            | 13MAR15    | 536                | N                 | N                      | N                | N                     |            |       |                 |                |             |               | YES                   |
| 285    | 0            | 13MAR15    | 577                | N                 | N                      | N                | N                     |            |       |                 |                |             |               | YES                   |
| 286    | 0            | 13MAR15    | 576                | N                 | N                      | N                | Y                     |            |       |                 |                |             |               | YES                   |
| 287    | 0            | 13MAR15    | 577                | N                 | Y                      | N                | N                     | 17         | 1     | 105.7           |                |             |               | NO                    |
| 288    | 0            | 13MAR15    | 453                | N                 | N                      | N                | N                     | 21         | 1     | 106.4           |                |             |               | NO                    |
| 289    | 0            | 13MAR15    | 406                | N                 | Y                      | N                | N                     |            |       |                 |                |             |               | YES                   |
| 29     | 0            | 06MAR15    | 503                | N                 | N                      | N                | N                     | 11         | 1     | 104.6           |                |             |               | NO                    |
| 290    | 0            | 13MAR15    | 463                | N                 | N                      | N                | N                     |            |       |                 |                |             |               | YES                   |
| 291    | 0            | 20MAR15    | 480                | N                 | N                      | N                | N                     | 13         | 1     | 105.6           | 20             | BRD         |               | NO                    |
| 292    | 0            | 20MAR15    | 441                | N                 | Y                      | N                | N                     | 12         | 1     | 103.7           | 24             | BRD         |               | NO                    |
| 293    | 0            | 20MAR15    | 493                | N                 | N                      | N                | N                     |            |       |                 |                |             |               | YES                   |
| 294    | 0            | 20MAR15    | 493                | N                 | Y                      | N                | N                     |            |       |                 |                |             |               | YES                   |
| 295    | 0            | 20MAR15    | 470                | N                 | N                      | N                | N                     | 7          | 1     | 104.9           | 22             | BRD         |               | NO                    |
| 296    | 0            | 20MAR15    | 456                | N                 | N                      | N                | N                     |            |       |                 |                |             |               | YES                   |
| 297    | 0            | 20MAR15    | 463                | N                 | N                      | N                | N                     |            |       |                 |                |             |               | YES                   |
| 298    | 0            | 20MAR15    | 558                | N                 | N                      | N                | N                     |            |       |                 |                |             |               | YES                   |
| 299    | 0            | 20MAR15    | 445                | N                 | N                      | N                | N                     |            |       |                 |                |             |               | YES                   |
| 3      | 0            | 06MAR15    | 470                | N                 | N                      | N                | N                     | 13         | 1     | 103.9           |                |             |               | NO                    |
| 30     | 0            | 06MAR15    | 524                | N                 | N                      | N                | N                     | 7          | 2     | 102.6           | 12             | BRD         |               | NO                    |
| 300    | 0            | 20MAR15    | 455                | N                 | N                      | N                | N                     | 19         | 1     | 104.6           | 35             | BRD         |               | NO                    |
| 301    | 0            | 20MAR15    | 510                | N                 | N                      | N                | N                     | 7          | 2     | 103.3           | 15             | BRD         |               | NO                    |
| 302    | 0            | 20MAR15    | 487                | N                 | N                      | N                | N                     | 7          | 1     | 104.9           |                |             |               | NO                    |
| 303    | 0            | 20MAR15    | 508                | N                 | N                      | N                | N                     |            |       |                 |                |             |               | YES                   |
| 305    | 0            | 20MAR15    | 478                | N                 | N                      | N                | N                     |            |       |                 |                |             |               | YES                   |
| 306    | 0            | 20MAR15    | 478                | N                 | N                      | N                | N                     |            |       |                 |                |             |               | YES                   |
| 307    | 0            | 20MAR15    | 420                | N                 | N                      | N                | N                     | 7          | 1     | 103.5           |                |             |               | NO                    |
| 308    | 0            | 20MAR15    | 520                | N                 | N                      | N                | N                     |            |       |                 |                |             |               | YES                   |
| 309    | 0            | 20MAR15    | 444                | N                 | N                      | N                | N                     | 7          | 1     | 104.7           |                |             |               | NO                    |
| 31     | 0            | 06MAR15    | 527                | N                 | N                      | N                | N                     |            |       |                 |                |             |               | YES                   |

DATA HAVE NOT BEEN VERIFIED

[1] Did not qualify for BRD re-treatment, not a BRD mortality and not removed for non-BRD reasons

PHASE IV ALL SPECIES STUDY BOVINE  
 STUDY: A131R-US-13-231  
 TREATMENT SUCCESS RATE  
 SUMMARY BY ANIMAL

09:30 Tuesday, October 27, 2015 9

treatment=T01 test material=DRAXXIN period=Arrival

| animal | day of study | day 0 date | day 0 weight (LBS) | histophilus somni | mannheimia haemolytica | mycoplasma bovis | pasteurella multocida | day of BRD | score | temperature (F) | day of removal | brd related | BRD mortality | treatment success [1] |
|--------|--------------|------------|--------------------|-------------------|------------------------|------------------|-----------------------|------------|-------|-----------------|----------------|-------------|---------------|-----------------------|
| 310    | 0            | 20MAR15    | 457                | N                 | N                      | N                | N                     |            |       |                 |                |             |               | YES                   |
| 311    | 0            | 20MAR15    | 405                | N                 | N                      | N                | N                     | 12         | 1     | 106.7           | 19             | BRD         |               | NO                    |
| 312    | 0            | 20MAR15    | 484                | N                 | N                      | N                | N                     | 18         | 1     | 107.0           |                |             |               | NO                    |
| 313    | 0            | 20MAR15    | 423                | N                 | N                      | N                | Y                     |            |       |                 |                |             |               | YES                   |
| 314    | 0            | 20MAR15    | 441                | N                 | N                      | N                | Y                     |            |       |                 |                |             |               | YES                   |
| 315    | 0            | 20MAR15    | 425                | N                 | N                      | N                | N                     | 25         | 1     | 104.3           |                |             |               | NO                    |
| 316    | 0            | 20MAR15    | 471                | N                 | N                      | N                | N                     |            |       |                 |                |             |               | YES                   |
| 317    | 0            | 20MAR15    | 463                | N                 | N                      | N                | N                     |            |       |                 |                |             |               | YES                   |
| 318    | 0            | 20MAR15    | 455                | N                 | N                      | N                | N                     | 25         | 1     | 104.8           | 32             | BRD         |               | NO                    |
| 319    | 0            | 20MAR15    | 439                | N                 | N                      | N                | N                     | 11         | 1     | 103.6           | 18             | BRD         |               | NO                    |
| 32     | 0            | 06MAR15    | 475                | N                 | N                      | N                | N                     |            |       |                 |                |             |               | YES                   |
| 320    | 0            | 20MAR15    | 459                | N                 | N                      | N                | Y                     | 14         | 1     | 107.0           |                |             |               | NO                    |
| 321    | 0            | 20MAR15    | 489                | N                 | N                      | N                | N                     |            |       |                 |                |             |               | YES                   |
| 322    | 0            | 20MAR15    | 455                | N                 | N                      | N                | N                     |            |       |                 |                |             |               | YES                   |
| 323    | 0            | 20MAR15    | 430                | N                 | N                      | N                | N                     | 14         | 1     | 104.2           |                |             |               | NO                    |
| 324    | 0            | 20MAR15    | 562                | N                 | N                      | N                | N                     |            |       |                 |                |             |               | YES                   |
| 325    | 0            | 20MAR15    | 506                | N                 | N                      | N                | N                     |            |       |                 |                |             |               | YES                   |
| 326    | 0            | 20MAR15    | 482                | N                 | N                      | N                | N                     |            |       |                 |                |             |               | YES                   |
| 327    | 0            | 20MAR15    | 502                | N                 | N                      | N                | N                     | 7          | 1     | 104.6           |                |             |               | NO                    |
| 328    | 0            | 20MAR15    | 451                | N                 | N                      | N                | N                     |            |       |                 |                |             |               | YES                   |
| 329    | 0            | 20MAR15    | 465                | N                 | N                      | N                | N                     | 15         | 1     | 103.5           |                |             |               | NO                    |
| 33     | 0            | 06MAR15    | 510                | N                 | N                      | N                | N                     | 12         | 1     | 104.7           | 21             | BRD         |               | NO                    |
| 330    | 0            | 20MAR15    | 454                | N                 | N                      | N                | Y                     | 8          | 1     | 106.1           | 12             | BRD         |               | NO                    |
| 331    | 0            | 20MAR15    | 458                | N                 | N                      | N                | N                     |            |       |                 |                |             |               | YES                   |
| 332    | 0            | 20MAR15    | 450                | N                 | N                      | N                | N                     | 9          | 1     | 104.1           |                |             |               | NO                    |
| 333    | 0            | 20MAR15    | 426                | N                 | N                      | N                | N                     |            |       |                 |                |             |               | YES                   |
| 334    | 0            | 20MAR15    | 510                | N                 | N                      | N                | N                     |            |       |                 |                |             |               | YES                   |
| 335    | 0            | 20MAR15    | 480                | N                 | N                      | N                | N                     |            |       |                 |                |             |               | YES                   |
| 336    | 0            | 20MAR15    | 494                | N                 | N                      | N                | N                     |            |       |                 |                |             |               | YES                   |
| 337    | 0            | 20MAR15    | 457                | N                 | N                      | N                | Y                     |            |       |                 |                |             |               | YES                   |
| 338    | 0            | 20MAR15    | 502                | N                 | N                      | N                | N                     |            |       |                 |                |             |               | YES                   |
| 339    | 0            | 20MAR15    | 475                | N                 | N                      | N                | Y                     |            |       |                 |                |             |               | YES                   |
| 34     | 0            | 06MAR15    | 529                | N                 | N                      | N                | N                     | 8          | 1     | 107.3           | 15             | BRD         |               | NO                    |
| 340    | 0            | 20MAR15    | 496                | N                 | N                      | N                | Y                     |            |       |                 |                |             |               | YES                   |

DATA HAVE NOT BEEN VERIFIED

[1] Did not qualify for BRD re-treatment, not a BRD mortality and not removed for non-BRD reasons

PHASE IV ALL SPECIES STUDY BOVINE  
 STUDY: A131R-US-13-231  
 TREATMENT SUCCESS RATE  
 SUMMARY BY ANIMAL

09:30 Tuesday, October 27, 2015 10

treatment=T01 test material=DRAXXIN period=Arrival

| animal | day of study | day 0 date | day 0 weight (LBS) | histophilus somni | mannheimia haemolytica | mycoplasma bovis | pasteurella multocida | day of BRD | score | temperature (F) | day of removal | brd related | BRD mortality | treatment success [1] |
|--------|--------------|------------|--------------------|-------------------|------------------------|------------------|-----------------------|------------|-------|-----------------|----------------|-------------|---------------|-----------------------|
| 341    | 0            | 20MAR15    | 471                | N                 | N                      | N                | N                     | 10         | 1     | 103.6           | 16             | BRD         |               | NO                    |
| 342    | 0            | 20MAR15    | 459                | N                 | N                      | N                | N                     | 7          | 1     | 103.8           |                |             |               | NO                    |
| 343    | 0            | 20MAR15    | 557                | N                 | N                      | N                | N                     | 18         | 1     | 104.2           | 26             | BRD         |               | NO                    |
| 344    | 0            | 20MAR15    | 468                | N                 | N                      | N                | N                     |            |       |                 |                |             |               | YES                   |
| 345    | 0            | 20MAR15    | 552                | N                 | N                      | N                | N                     |            |       |                 |                |             |               | YES                   |
| 346    | 0            | 20MAR15    | 422                | N                 | N                      | N                | N                     | 13         | 1     | 104.4           | 23             | BRD         |               | NO                    |
| 347    | 0            | 20MAR15    | 496                | N                 | N                      | N                | N                     |            |       |                 |                |             |               | YES                   |
| 348    | 0            | 20MAR15    | 509                | N                 | N                      | N                | N                     |            |       |                 |                |             |               | YES                   |
| 349    | 0            | 20MAR15    | 441                | N                 | N                      | N                | N                     | 16         | 2     | 106.4           | 27             | BRD         |               | NO                    |
| 35     | 0            | 06MAR15    | 495                | N                 | N                      | N                | N                     | 16         | 1     | 104.2           |                |             |               | NO                    |
| 350    | 0            | 20MAR15    | 471                | N                 | N                      | N                | N                     | 21         | 2     | 106.7           |                |             |               | NO                    |
| 352    | 0            | 20MAR15    | 435                | N                 | N                      | N                | Y                     |            |       |                 |                |             |               | YES                   |
| 353    | 0            | 20MAR15    | 457                | N                 | N                      | N                | N                     | 19         | 1     | 105.3           |                |             |               | NO                    |
| 354    | 0            | 20MAR15    | 459                | N                 | N                      | N                | N                     |            |       |                 |                |             |               | YES                   |
| 355    | 0            | 20MAR15    | 475                | N                 | N                      | N                | N                     |            |       |                 |                |             |               | YES                   |
| 356    | 0            | 20MAR15    | 404                | N                 | N                      | N                | N                     | 7          | 1     | 103.8           | 18             | BRD         |               | NO                    |
| 357    | 0            | 20MAR15    | 429                | N                 | N                      | N                | N                     | 11         | 1     | 106.6           | 15             | BRD         | YES           | NO                    |
| 358    | 0            | 20MAR15    | 482                | N                 | N                      | N                | N                     |            |       |                 |                |             |               | YES                   |
| 359    | 0            | 20MAR15    | 484                | N                 | N                      | N                | N                     |            |       |                 |                |             |               | YES                   |
| 36     | 0            | 06MAR15    | 530                | N                 | N                      | N                | N                     |            |       |                 |                |             |               | YES                   |
| 360    | 0            | 20MAR15    | 436                | N                 | N                      | N                | N                     |            |       |                 |                |             |               | YES                   |
| 361    | 0            | 20MAR15    | 456                | N                 | N                      | N                | Y                     |            |       |                 |                |             |               | YES                   |
| 362    | 0            | 20MAR15    | 506                | N                 | N                      | N                | N                     |            |       |                 |                |             |               | YES                   |
| 363    | 0            | 20MAR15    | 465                | N                 | Y                      | N                | N                     |            |       |                 |                |             |               | YES                   |
| 364    | 0            | 20MAR15    | 507                | N                 | N                      | N                | N                     |            |       |                 |                |             |               | YES                   |
| 365    | 0            | 20MAR15    | 457                | N                 | N                      | N                | N                     | 19         | 1     | 105.1           | 27             | BRD         |               | NO                    |
| 366    | 0            | 20MAR15    | 434                | N                 | Y                      | N                | N                     | 10         | 1     | 107.4           | 17             | BRD         |               | NO                    |
| 367    | 0            | 20MAR15    | 474                | N                 | N                      | N                | N                     | 14         | 1     | 104.6           | 17             | BRD         |               | NO                    |
| 368    | 0            | 20MAR15    | 448                | N                 | N                      | N                | N                     |            |       |                 |                |             |               | YES                   |
| 369    | 0            | 20MAR15    | 507                | N                 | N                      | N                | N                     | 15         | 1     | 105.3           |                |             |               | NO                    |
| 37     | 0            | 06MAR15    | 564                | N                 | N                      | N                | N                     | 10         | 1     | 105.6           |                |             |               | NO                    |
| 370    | 0            | 20MAR15    | 452                | N                 | N                      | N                | N                     | 12         | 1     | 106.8           | 16             | BRD         |               | NO                    |
| 371    | 0            | 20MAR15    | 513                | N                 | N                      | N                | N                     |            |       |                 |                |             |               | YES                   |
| 372    | 0            | 20MAR15    | 478                | N                 | N                      | N                | Y                     |            |       |                 |                |             |               | YES                   |

DATA HAVE NOT BEEN VERIFIED

[1] Did not qualify for BRD re-treatment, not a BRD mortality and not removed for non-BRD reasons

PHASE IV ALL SPECIES STUDY BOVINE  
 STUDY: A131R-US-13-231  
 TREATMENT SUCCESS RATE  
 SUMMARY BY ANIMAL

09:30 Tuesday, October 27, 2015 11

treatment=T01 test material=DRAXXIN period=Arrival

| animal | day of study | day 0 date | day 0 weight (LBS) | histophilus somni | mannheimia haemolytica | mycoplasma bovis | pasteurella multocida | day of BRD | score | temperature (F) | day of removal | brd related | BRD mortality | treatment success [1] |
|--------|--------------|------------|--------------------|-------------------|------------------------|------------------|-----------------------|------------|-------|-----------------|----------------|-------------|---------------|-----------------------|
| 373    | 0            | 20MAR15    | 449                | N                 | N                      | N                | N                     | 20         | 1     | 104.7           |                |             |               | NO                    |
| 374    | 0            | 20MAR15    | 475                | N                 | N                      | N                | N                     | 13         | 1     | 107.3           | 15             | BRD         | YES           | NO                    |
| 375    | 0            | 20MAR15    | 401                | N                 | N                      | N                | N                     |            |       |                 |                |             |               | YES                   |
| 376    | 0            | 20MAR15    | 450                | N                 | N                      | N                | N                     |            |       |                 |                |             |               | YES                   |
| 377    | 0            | 20MAR15    | 436                | N                 | N                      | N                | N                     | 23         | 1     | 106.4           |                |             |               | NO                    |
| 378    | 0            | 20MAR15    | 495                | N                 | N                      | N                | N                     | 10         | 1     | 104.8           | 17             | BRD         |               | NO                    |
| 379    | 0            | 20MAR15    | 475                | N                 | N                      | N                | N                     | 10         | 1     | 104.6           | 16             | BRD         |               | NO                    |
| 38     | 0            | 06MAR15    | 464                | N                 | Y                      | N                | N                     | 11         | 1     | 103.9           |                |             |               | NO                    |
| 380    | 0            | 20MAR15    | 411                | N                 | N                      | N                | Y                     | 15         | 1     | 106.3           | 18             | BRD         |               | NO                    |
| 381    | 0            | 20MAR15    | 466                | N                 | N                      | N                | N                     |            |       |                 |                |             |               | YES                   |
| 382    | 0            | 20MAR15    | 460                | N                 | N                      | N                | N                     |            |       |                 |                |             |               | YES                   |
| 383    | 0            | 20MAR15    | 483                | N                 | N                      | N                | N                     | 9          | 1     | 103.7           |                |             |               | NO                    |
| 384    | 0            | 20MAR15    | 478                | N                 | N                      | N                | N                     | 8          | 1     | 103.8           |                |             |               | NO                    |
| 385    | 0            | 20MAR15    | 484                | N                 | N                      | N                | N                     | 9          | 1     | 105.1           |                |             |               | NO                    |
| 386    | 0            | 20MAR15    | 546                | N                 | N                      | N                | N                     | 12         | 1     | 103.8           |                |             |               | NO                    |
| 387    | 0            | 20MAR15    | 526                | N                 | N                      | N                | N                     |            |       |                 |                |             |               | YES                   |
| 388    | 0            | 20MAR15    | 471                | N                 | N                      | N                | N                     | 15         | 1     | 104.8           | 19             | BRD         |               | NO                    |
| 389    | 0            | 20MAR15    | 586                | N                 | N                      | N                | N                     |            |       |                 |                |             |               | YES                   |
| 39     | 0            | 06MAR15    | 542                | N                 | N                      | N                | N                     | 12         | 1     | 104.9           | 29             | BRD         |               | NO                    |
| 390    | 0            | 20MAR15    | 573                | N                 | N                      | N                | N                     | 16         | 1     | 106.0           |                |             |               | NO                    |
| 391    | 0            | 20MAR15    | 597                | N                 | N                      | N                | Y                     | 14         | 1     | 107.0           | 21             | BRD         |               | NO                    |
| 392    | 0            | 20MAR15    | 583                | N                 | N                      | N                | N                     |            |       |                 |                |             |               | YES                   |
| 393    | 0            | 20MAR15    | 538                | N                 | N                      | N                | N                     |            |       |                 |                |             |               | YES                   |
| 394    | 0            | 20MAR15    | 510                | N                 | N                      | N                | N                     |            |       |                 |                |             |               | YES                   |
| 395    | 0            | 20MAR15    | 614                | N                 | N                      | N                | N                     | 7          | 1     | 103.7           |                |             |               | NO                    |
| 396    | 0            | 20MAR15    | 536                | N                 | N                      | N                | N                     | 19         | 1     | 103.7           |                |             |               | NO                    |
| 397    | 0            | 20MAR15    | 500                | N                 | N                      | N                | Y                     |            |       |                 |                |             |               | YES                   |
| 398    | 0            | 20MAR15    | 481                | N                 | N                      | N                | N                     |            |       |                 |                |             |               | YES                   |
| 399    | 0            | 20MAR15    | 551                | N                 | N                      | N                | Y                     |            |       |                 |                |             |               | YES                   |
| 4      | 0            | 06MAR15    | 501                | N                 | N                      | N                | N                     |            |       |                 |                |             |               | YES                   |
| 40     | 0            | 06MAR15    | 506                | N                 | N                      | N                | Y                     |            |       |                 |                |             |               | YES                   |
| 400    | 0            | 20MAR15    | 530                | N                 | N                      | N                | N                     |            |       |                 |                |             |               | YES                   |
| 401    | 0            | 20MAR15    | 517                | N                 | N                      | N                | N                     |            |       |                 |                |             |               | YES                   |
| 402    | 0            | 20MAR15    | 642                | N                 | N                      | N                | N                     |            |       |                 |                |             |               | YES                   |

DATA HAVE NOT BEEN VERIFIED

[1] Did not qualify for BRD re-treatment, not a BRD mortality and not removed for non-BRD reasons

PHASE IV ALL SPECIES STUDY BOVINE  
 STUDY: A131R-US-13-231  
 TREATMENT SUCCESS RATE  
 SUMMARY BY ANIMAL

09:30 Tuesday, October 27, 2015 12

treatment=T01 test material=DRAXXIN period=Arrival

| animal | day of study | day 0 date | day 0 weight (LBS) | histophilus somni | mannheimia haemolytica | mycoplasma bovis | pasteurella multocida | day of BRD | score | temperature (F) | day of removal | brd related | BRD mortality | treatment success [1] |
|--------|--------------|------------|--------------------|-------------------|------------------------|------------------|-----------------------|------------|-------|-----------------|----------------|-------------|---------------|-----------------------|
| 403    | 0            | 20MAR15    | 540                | N                 | N                      | N                | N                     |            |       |                 |                |             |               | YES                   |
| 404    | 0            | 20MAR15    | 550                | N                 | N                      | N                | N                     |            |       |                 |                |             |               | YES                   |
| 405    | 0            | 20MAR15    | 532                | N                 | Y                      | N                | N                     |            |       |                 |                |             |               | YES                   |
| 406    | 0            | 20MAR15    | 533                | N                 | N                      | N                | N                     | 17         | 2     | 106.7           |                |             |               | NO                    |
| 407    | 0            | 20MAR15    | 537                | N                 | N                      | N                | N                     | 11         | 1     | 103.5           |                |             |               | NO                    |
| 408    | 0            | 20MAR15    | 527                | N                 | N                      | N                | N                     |            |       |                 |                |             |               | YES                   |
| 409    | 0            | 20MAR15    | 518                | N                 | N                      | N                | N                     |            |       |                 |                |             |               | YES                   |
| 41     | 0            | 06MAR15    | 467                | N                 | N                      | N                | N                     |            |       |                 |                |             |               | YES                   |
| 410    | 0            | 20MAR15    | 505                | N                 | N                      | N                | N                     | 10         | 1     | 104.1           | 17             | BRD         |               | NO                    |
| 411    | 0            | 20MAR15    | 538                | N                 | N                      | N                | N                     | 12         | 2     | 104.9           |                |             |               | NO                    |
| 412    | 0            | 20MAR15    | 500                | N                 | N                      | N                | N                     |            |       |                 |                |             |               | YES                   |
| 413    | 0            | 20MAR15    | 567                | N                 | N                      | N                | N                     |            |       |                 |                |             |               | YES                   |
| 415    | 0            | 20MAR15    | 521                | N                 | N                      | N                | N                     | 10         | 1     | 104.7           | 17             | BRD         |               | NO                    |
| 416    | 0            | 20MAR15    | 489                | N                 | N                      | N                | N                     | 13         | 1     | 107.1           |                |             |               | NO                    |
| 417    | 0            | 20MAR15    | 515                | N                 | N                      | N                | N                     | 7          | 1     | 103.5           | 15             | BRD         |               | NO                    |
| 418    | 0            | 20MAR15    | 511                | N                 | N                      | N                | N                     |            |       |                 |                |             |               | YES                   |
| 419    | 0            | 20MAR15    | 511                | N                 | N                      | N                | Y                     |            |       |                 |                |             |               | YES                   |
| 42     | 0            | 06MAR15    | 478                | N                 | N                      | N                | N                     |            |       |                 |                |             |               | YES                   |
| 420    | 0            | 20MAR15    | 552                | N                 | N                      | N                | N                     |            |       |                 |                |             |               | YES                   |
| 421    | 0            | 20MAR15    | 570                | N                 | N                      | N                | N                     |            |       |                 |                |             |               | YES                   |
| 422    | 0            | 20MAR15    | 514                | N                 | N                      | N                | N                     | 15         | 1     | 104.2           | 18             | BRD         |               | NO                    |
| 423    | 0            | 20MAR15    | 560                | N                 | N                      | N                | N                     |            |       |                 |                |             |               | YES                   |
| 424    | 0            | 20MAR15    | 526                | N                 | N                      | N                | N                     |            |       |                 |                |             |               | YES                   |
| 425    | 0            | 20MAR15    | 556                | N                 | N                      | N                | Y                     |            |       |                 |                |             |               | YES                   |
| 426    | 0            | 20MAR15    | 528                | N                 | N                      | N                | N                     |            |       |                 |                |             |               | YES                   |
| 427    | 0            | 20MAR15    | 550                | N                 | N                      | N                | N                     |            |       |                 |                |             |               | YES                   |
| 428    | 0            | 20MAR15    | 515                | N                 | N                      | N                | N                     | 14         | 1     | 104.4           |                |             |               | NO                    |
| 429    | 0            | 20MAR15    | 522                | N                 | N                      | N                | N                     |            |       |                 |                |             |               | YES                   |
| 43     | 0            | 06MAR15    | 518                | N                 | N                      | N                | N                     |            |       |                 |                |             |               | YES                   |
| 430    | 0            | 20MAR15    | 571                | N                 | N                      | N                | N                     |            |       |                 |                |             |               | YES                   |
| 431    | 0            | 20MAR15    | 537                | N                 | N                      | N                | N                     | 19         | 1     | 103.9           |                |             |               | NO                    |
| 432    | 0            | 20MAR15    | 526                | N                 | N                      | N                | N                     | 8          | 1     | 103.8           |                |             |               | NO                    |
| 433    | 0            | 20MAR15    | 546                | N                 | N                      | N                | N                     | 12         | 1     | 103.9           | 15             | BRD         |               | NO                    |
| 434    | 0            | 20MAR15    | 500                | N                 | N                      | N                | Y                     |            |       |                 |                |             |               | YES                   |

DATA HAVE NOT BEEN VERIFIED

[1] Did not qualify for BRD re-treatment, not a BRD mortality and not removed for non-BRD reasons

PHASE IV ALL SPECIES STUDY BOVINE  
 STUDY: A131R-US-13-231  
 TREATMENT SUCCESS RATE  
 SUMMARY BY ANIMAL

09:30 Tuesday, October 27, 2015 13

treatment=T01 test material=DRAXXIN period=Arrival

| animal | day of study | day 0 date | day 0 weight (LBS) | histophilus somni | mannheimia haemolytica | mycoplasma bovis | pasteurella multocida | day of BRD | score | temperature (F) | day of removal | brd related | BRD mortality | treatment success [1] |
|--------|--------------|------------|--------------------|-------------------|------------------------|------------------|-----------------------|------------|-------|-----------------|----------------|-------------|---------------|-----------------------|
| 435    | 0            | 20MAR15    | 586                | N                 | N                      | N                | N                     |            |       |                 |                |             |               | YES                   |
| 436    | 0            | 20MAR15    | 537                | N                 | N                      | N                | N                     | 19         | 1     | 106.1           |                |             |               | NO                    |
| 437    | 0            | 20MAR15    | 544                | N                 | Y                      | N                | Y                     | 11         | 1     | 106.1           | 30             | BRD         |               | NO                    |
| 438    | 0            | 20MAR15    | 573                | N                 | N                      | N                | N                     |            |       |                 |                |             |               | YES                   |
| 439    | 0            | 20MAR15    | 552                | N                 | N                      | N                | N                     | 7          | 1     | 106.7           |                |             |               | NO                    |
| 44     | 0            | 06MAR15    | 450                | N                 | N                      | N                | N                     | 10         | 1     | 104.5           | 19             | BRD         |               | NO                    |
| 440    | 0            | 20MAR15    | 508                | N                 | N                      | N                | N                     | 7          | 1     | 103.5           | 20             | BRD         |               | NO                    |
| 441    | 0            | 20MAR15    | 506                | N                 | N                      | N                | N                     | 19         | 1     | 105.8           |                |             |               | NO                    |
| 442    | 0            | 20MAR15    | 472                | N                 | N                      | N                | N                     |            |       |                 |                |             |               | YES                   |
| 443    | 0            | 20MAR15    | 578                | N                 | N                      | N                | N                     |            |       |                 |                |             |               | YES                   |
| 444    | 0            | 20MAR15    | 494                | N                 | Y                      | N                | N                     |            |       |                 |                |             |               | YES                   |
| 445    | 0            | 20MAR15    | 551                | N                 | N                      | N                | N                     | 12         | 1     | 105.6           |                |             |               | NO                    |
| 446    | 0            | 20MAR15    | 490                | N                 | N                      | N                | N                     |            |       |                 |                |             |               | YES                   |
| 447    | 0            | 20MAR15    | 515                | N                 | N                      | N                | N                     | 12         | 1     | 104.5           | 20             | BRD         |               | NO                    |
| 448    | 0            | 20MAR15    | 533                | N                 | N                      | N                | N                     | 10         | 1     | 103.8           | 15             | BRD         |               | NO                    |
| 449    | 0            | 20MAR15    | 560                | N                 | Y                      | N                | N                     |            |       |                 |                |             |               | YES                   |
| 45     | 0            | 06MAR15    | 430                | N                 | N                      | N                | N                     | 7          | 2     | 103.1           | 20             | BRD         |               | NO                    |
| 450    | 0            | 20MAR15    | 541                | N                 | N                      | N                | N                     | 11         | 1     | 103.6           | 18             | BRD         |               | NO                    |
| 451    | 0            | 20MAR15    | 512                | N                 | N                      | N                | N                     |            |       |                 |                |             |               | YES                   |
| 452    | 0            | 20MAR15    | 530                | N                 | N                      | N                | Y                     | 23         | 1     | 106.0           | 25             | BRD         |               | NO                    |
| 453    | 0            | 20MAR15    | 538                | N                 | N                      | N                | N                     | 7          | 1     | 103.9           |                |             |               | NO                    |
| 454    | 0            | 20MAR15    | 523                | N                 | N                      | N                | N                     | 11         | 1     | 104.1           | 18             | BRD         |               | NO                    |
| 455    | 0            | 20MAR15    | 544                | N                 | N                      | N                | N                     |            |       |                 |                |             |               | YES                   |
| 456    | 0            | 20MAR15    | 548                | N                 | N                      | N                | N                     | 10         | 1     | 105.1           | 15             | BRD         |               | NO                    |
| 457    | 0            | 20MAR15    | 518                | N                 | N                      | N                | N                     |            |       |                 |                |             |               | YES                   |
| 458    | 0            | 20MAR15    | 552                | N                 | N                      | N                | N                     | 12         | 1     | 105.2           | 20             | BRD         |               | NO                    |
| 459    | 0            | 20MAR15    | 612                | N                 | N                      | N                | N                     |            |       |                 |                |             |               | YES                   |
| 46     | 0            | 06MAR15    | 470                | N                 | N                      | N                | Y                     | 7          | 2     | 103.5           |                |             |               | NO                    |
| 460    | 0            | 20MAR15    | 508                | N                 | N                      | N                | N                     | 24         | 1     | 104.3           |                |             |               | NO                    |
| 461    | 0            | 20MAR15    | 543                | N                 | N                      | N                | N                     | 9          | 1     | 104.0           |                |             |               | NO                    |
| 462    | 0            | 20MAR15    | 524                | N                 | N                      | N                | N                     | 15         | 1     | 104.9           |                |             |               | NO                    |
| 463    | 0            | 20MAR15    | 587                | N                 | N                      | N                | N                     | 15         | 1     | 103.9           |                |             |               | NO                    |
| 464    | 0            | 20MAR15    | 497                | N                 | N                      | N                | Y                     |            |       |                 |                |             |               | YES                   |
| 465    | 0            | 20MAR15    | 482                | N                 | N                      | N                | N                     |            |       |                 |                |             |               | YES                   |

DATA HAVE NOT BEEN VERIFIED

[1] Did not qualify for BRD re-treatment, not a BRD mortality and not removed for non-BRD reasons

PHASE IV ALL SPECIES STUDY BOVINE  
 STUDY: A131R-US-13-231  
 TREATMENT SUCCESS RATE  
 SUMMARY BY ANIMAL

09:30 Tuesday, October 27, 2015 14

treatment=T01 test material=DRAXXIN period=Arrival

| animal | day of study | day 0 date | day 0 weight (LBS) | histophilus somni | mannheimia haemolytica | mycoplasma bovis | pasteurella multocida | day of BRD | score | temperature (F) | day of removal | brd related | BRD mortality | treatment success [1] |
|--------|--------------|------------|--------------------|-------------------|------------------------|------------------|-----------------------|------------|-------|-----------------|----------------|-------------|---------------|-----------------------|
| 466    | 0            | 20MAR15    | 491                | N                 | N                      | N                | N                     |            |       |                 |                |             |               | YES                   |
| 467    | 0            | 20MAR15    | 560                | N                 | N                      | N                | N                     | 21         | 2     | 103.6           |                |             |               | NO                    |
| 468    | 0            | 20MAR15    | 495                | N                 | N                      | N                | N                     |            |       |                 |                |             |               | YES                   |
| 469    | 0            | 23MAR15    | 432                | N                 | N                      | N                | N                     | 8          | 1     | 103.7           | 17             | BRD         |               | NO                    |
| 47     | 0            | 06MAR15    | 496                | N                 | N                      | N                | N                     |            |       |                 |                |             |               | YES                   |
| 470    | 0            | 23MAR15    | 497                | N                 | N                      | N                | N                     | 15         | 1     | 106.5           | 18             | BRD         |               | NO                    |
| 471    | 0            | 23MAR15    | 529                | Y                 | N                      | N                | N                     | 16         | 2     | 106.1           | 18             | BRD         |               | NO                    |
| 472    | 0            | 23MAR15    | 514                | N                 | Y                      | N                | N                     |            |       |                 |                |             |               | YES                   |
| 473    | 0            | 23MAR15    | 450                | N                 | Y                      | N                | N                     | 11         | 1     | 104.1           | 18             | BRD         |               | NO                    |
| 474    | 0            | 23MAR15    | 502                | N                 | N                      | N                | Y                     | 12         | 1     | 104.9           |                |             |               | NO                    |
| 475    | 0            | 23MAR15    | 484                | N                 | N                      | N                | N                     |            |       |                 |                |             |               | YES                   |
| 476    | 0            | 23MAR15    | 532                | N                 | Y                      | N                | N                     | 10         | 1     | 106.9           | 15             | BRD         |               | NO                    |
| 477    | 0            | 23MAR15    | 445                | N                 | N                      | N                | N                     | 8          | 1     | 103.7           | 18             | BRD         |               | NO                    |
| 478    | 0            | 23MAR15    | 555                | N                 | N                      | N                | Y                     | 11         | 1     | 103.8           | 32             | BRD         |               | NO                    |
| 479    | 0            | 23MAR15    | 538                | N                 | N                      | N                | N                     |            |       |                 |                |             |               | YES                   |
| 48     | 0            | 06MAR15    | 488                | N                 | N                      | N                | N                     |            |       |                 |                |             |               | YES                   |
| 480    | 0            | 23MAR15    | 565                | N                 | N                      | N                | N                     |            |       |                 |                |             |               | YES                   |
| 481    | 0            | 23MAR15    | 568                | N                 | N                      | N                | Y                     |            |       |                 |                |             |               | YES                   |
| 482    | 0            | 23MAR15    | 538                | N                 | N                      | N                | N                     |            |       |                 |                |             |               | YES                   |
| 483    | 0            | 23MAR15    | 496                | N                 | N                      | N                | N                     |            |       |                 |                |             |               | YES                   |
| 484    | 0            | 23MAR15    | 537                | N                 | N                      | N                | N                     | 14         | 1     | 105.7           |                |             |               | NO                    |
| 485    | 0            | 23MAR15    | 504                | N                 | Y                      | N                | N                     | 7          | 1     | 104.1           | 16             | BRD         |               | NO                    |
| 486    | 0            | 23MAR15    | 484                | N                 | N                      | N                | N                     | 15         | 1     | 106.9           | 18             | BRD         |               | NO                    |
| 487    | 0            | 23MAR15    | 579                | N                 | Y                      | N                | N                     | 36         | 1     | 103.5           | 40             | BRD         |               | NO                    |
| 488    | 0            | 23MAR15    | 430                | N                 | Y                      | N                | N                     | 10         | 1     | 105.0           | 22             | BRD         |               | NO                    |
| 489    | 0            | 23MAR15    | 503                | N                 | N                      | N                | N                     | 7          | 1     | 105.3           | 15             | BRD         |               | NO                    |
| 49     | 0            | 06MAR15    | 484                | N                 | N                      | N                | N                     | 21         | 1     | 104.0           |                |             |               | NO                    |
| 490    | 0            | 23MAR15    | 516                | N                 | N                      | N                | Y                     |            |       |                 |                |             |               | YES                   |
| 491    | 0            | 23MAR15    | 482                | N                 | N                      | N                | N                     | 7          | 1     | 103.9           | 22             | BRD         |               | NO                    |
| 492    | 0            | 23MAR15    | 537                | N                 | N                      | N                | N                     | 10         | 1     | 105.6           | 14             | BRD         |               | NO                    |
| 493    | 0            | 23MAR15    | 505                | N                 | Y                      | N                | N                     | 9          | 1     | 106.1           | 17             | BRD         |               | NO                    |
| 494    | 0            | 23MAR15    | 428                | N                 | N                      | N                | N                     | 7          | 1     | 103.8           | 19             | BRD         |               | NO                    |
| 495    | 0            | 23MAR15    | 517                | N                 | Y                      | N                | Y                     |            |       |                 |                |             |               | YES                   |
| 496    | 0            | 23MAR15    | 542                | N                 | N                      | N                | N                     | 12         | 1     | 103.6           |                |             |               | NO                    |

DATA HAVE NOT BEEN VERIFIED

[1] Did not qualify for BRD re-treatment, not a BRD mortality and not removed for non-BRD reasons

PHASE IV ALL SPECIES STUDY BOVINE  
 STUDY: A131R-US-13-231  
 TREATMENT SUCCESS RATE  
 SUMMARY BY ANIMAL

09:30 Tuesday, October 27, 2015 15

treatment=T01 test material=DRAXXIN period=Arrival

| animal | day of study | day 0 date | day 0 weight (LBS) | histophilus somni | mannheimia haemolytica | mycoplasma bovis | pasteurella multocida | day of BRD | score | temperature (F) | day of removal | brd related | BRD mortality | treatment success [1] |
|--------|--------------|------------|--------------------|-------------------|------------------------|------------------|-----------------------|------------|-------|-----------------|----------------|-------------|---------------|-----------------------|
| 497    | 0            | 23MAR15    | 439                | N                 | N                      | N                | N                     | 9          | 1     | 104.2           | 20             | BRD         |               | NO                    |
| 498    | 0            | 23MAR15    | 559                | N                 | N                      | N                | N                     |            |       |                 |                |             |               | YES                   |
| 499    | 0            | 23MAR15    | 420                | N                 | N                      | N                | N                     | 7          | 1     | 104.3           | 16             | BRD         |               | NO                    |
| 5      | 0            | 06MAR15    | 472                | N                 | N                      | N                | Y                     | 10         | 1     | 103.5           | 20             | BRD         |               | NO                    |
| 50     | 0            | 06MAR15    | 526                | N                 | N                      | N                | N                     |            |       |                 |                |             |               | YES                   |
| 500    | 0            | 23MAR15    | 495                | N                 | Y                      | N                | N                     |            |       |                 |                |             |               | YES                   |
| 501    | 0            | 23MAR15    | 551                | N                 | N                      | N                | N                     | 12         | 1     | 105.7           |                |             |               | NO                    |
| 502    | 0            | 23MAR15    | 476                | N                 | N                      | N                | N                     |            |       |                 |                |             |               | YES                   |
| 503    | 0            | 23MAR15    | 512                | N                 | N                      | N                | Y                     | 24         | 1     | 106.3           |                |             |               | NO                    |
| 504    | 0            | 23MAR15    | 463                | N                 | N                      | N                | N                     |            |       |                 |                |             |               | YES                   |
| 505    | 0            | 23MAR15    | 486                | N                 | Y                      | N                | Y                     | 7          | 1     | 105.3           | 15             | BRD         |               | NO                    |
| 506    | 0            | 23MAR15    | 539                | N                 | N                      | N                | N                     | 15         | 1     | 104.8           |                |             |               | NO                    |
| 507    | 0            | 23MAR15    | 540                | N                 | N                      | N                | N                     |            |       |                 |                |             |               | YES                   |
| 508    | 0            | 23MAR15    | 485                | N                 | N                      | N                | Y                     | 15         | 1     | 106.2           | 18             | BRD         |               | NO                    |
| 509    | 0            | 23MAR15    | 457                | N                 | N                      | N                | N                     | 8          | 1     | 104.3           | 21             | BRD         |               | NO                    |
| 51     | 0            | 06MAR15    | 514                | N                 | N                      | N                | N                     | 10         | 1     | 103.9           | 17             | BRD         |               | NO                    |
| 510    | 0            | 23MAR15    | 575                | N                 | N                      | N                | N                     | 16         | 2     | 106.0           | 24             | BRD         |               | NO                    |
| 511    | 0            | 23MAR15    | 485                | N                 | N                      | N                | N                     | 11         | 1     | 104.0           | 16             | BRD         |               | NO                    |
| 512    | 0            | 23MAR15    | 573                | N                 | N                      | N                | Y                     | 10         | 1     | 103.8           |                |             |               | NO                    |
| 513    | 0            | 23MAR15    | 527                | N                 | N                      | N                | Y                     | 21         | 1     | 103.6           |                |             |               | NO                    |
| 514    | 0            | 23MAR15    | 471                | N                 | N                      | N                | N                     |            |       |                 |                |             |               | YES                   |
| 515    | 0            | 23MAR15    | 540                | N                 | Y                      | N                | N                     |            |       |                 |                |             |               | YES                   |
| 516    | 0            | 23MAR15    | 493                | N                 | N                      | N                | N                     |            |       |                 |                |             |               | YES                   |
| 517    | 0            | 23MAR15    | 480                | N                 | N                      | N                | N                     | 8          | 1     | 104.9           | 15             | BRD         |               | NO                    |
| 518    | 0            | 23MAR15    | 518                | N                 | N                      | N                | N                     | 10         | 1     | 104.5           |                |             |               | NO                    |
| 519    | 0            | 23MAR15    | 506                | N                 | N                      | N                | N                     | 15         | 1     | 106.5           |                |             |               | NO                    |
| 52     | 0            | 06MAR15    | 509                | N                 | N                      | N                | N                     | 10         | 2     |                 | 19             | BRD         |               | NO                    |
| 520    | 0            | 23MAR15    | 545                | N                 | N                      | N                | N                     | 7          | 1     | 103.5           | 15             | BRD         |               | NO                    |
| 521    | 0            | 23MAR15    | 459                | N                 | N                      | N                | N                     |            |       |                 |                |             |               | YES                   |
| 522    | 0            | 23MAR15    | 478                | N                 | N                      | N                | Y                     | 9          | 1     | 103.8           | 27             | BRD         |               | NO                    |
| 523    | 0            | 23MAR15    | 446                | N                 | N                      | N                | N                     |            |       |                 |                |             |               | YES                   |
| 524    | 0            | 23MAR15    | 500                | N                 | N                      | N                | N                     | 15         | 1     | 104.9           | 22             | BRD         |               | NO                    |
| 525    | 0            | 23MAR15    | 537                | N                 | N                      | N                | Y                     |            |       |                 |                |             |               | YES                   |
| 526    | 0            | 23MAR15    | 568                | N                 | N                      | N                | N                     | 12         | 1     | 104.0           |                |             |               | NO                    |

DATA HAVE NOT BEEN VERIFIED

[1] Did not qualify for BRD re-treatment, not a BRD mortality and not removed for non-BRD reasons



PHASE IV ALL SPECIES STUDY BOVINE  
 STUDY: A131R-US-13-231  
 TREATMENT SUCCESS RATE  
 SUMMARY BY ANIMAL

09:30 Tuesday, October 27, 2015 16

treatment=T01 test material=DRAXXIN period=Arrival

| animal | day of study | day 0 date | day 0 weight (LBS) | histophilus somni | mannheimia haemolytica | mycoplasma bovis | pasteurella multocida | day of BRD | score | temperature (F) | day of removal | brd related | BRD mortality | treatment success [1] |
|--------|--------------|------------|--------------------|-------------------|------------------------|------------------|-----------------------|------------|-------|-----------------|----------------|-------------|---------------|-----------------------|
| 527    | 0            | 23MAR15    | 517                | N                 | N                      | N                | N                     |            |       |                 |                |             |               | YES                   |
| 528    | 0            | 23MAR15    | 577                | N                 | N                      | N                | N                     |            |       |                 |                |             |               | YES                   |
| 529    | 0            | 23MAR15    | 495                | N                 | N                      | N                | N                     |            |       |                 |                |             |               | YES                   |
| 53     | 0            | 06MAR15    | 547                | N                 | N                      | N                | N                     |            |       |                 |                |             |               | YES                   |
| 530    | 0            | 23MAR15    | 507                | N                 | N                      | N                | N                     |            |       |                 |                |             |               | YES                   |
| 531    | 0            | 23MAR15    | 490                | N                 | Y                      | N                | Y                     | 15         | 1     | 106.2           | 22             | BRD         |               | NO                    |
| 532    | 0            | 23MAR15    | 496                | N                 | N                      | N                | N                     | 13         | 1     | 105.9           |                |             |               | NO                    |
| 533    | 0            | 23MAR15    | 481                | N                 | N                      | N                | N                     |            |       |                 |                |             |               | YES                   |
| 534    | 0            | 23MAR15    | 500                | N                 | N                      | N                | N                     |            |       |                 |                |             |               | YES                   |
| 535    | 0            | 23MAR15    | 454                | N                 | N                      | N                | N                     |            |       |                 |                |             |               | YES                   |
| 536    | 0            | 23MAR15    | 518                | N                 | N                      | N                | N                     |            |       |                 |                |             |               | YES                   |
| 537    | 0            | 23MAR15    | 491                | N                 | N                      | N                | N                     | 17         | 2     | 106.3           | 22             | BRD         |               | NO                    |
| 538    | 0            | 23MAR15    | 517                | N                 | N                      | N                | N                     |            |       |                 |                |             |               | YES                   |
| 539    | 0            | 23MAR15    | 527                | N                 | N                      | N                | N                     |            |       |                 |                |             |               | YES                   |
| 54     | 0            | 06MAR15    | 511                | N                 | N                      | N                | N                     |            |       |                 |                |             |               | YES                   |
| 540    | 0            | 23MAR15    | 520                | N                 | N                      | N                | N                     |            |       |                 |                |             |               | YES                   |
| 541    | 0            | 23MAR15    | 502                | N                 | Y                      | N                | N                     | 12         | 1     | 105.6           | 19             | BRD         |               | NO                    |
| 542    | 0            | 23MAR15    | 473                | N                 | Y                      | N                | N                     | 19         | 1     | 103.6           |                |             |               | NO                    |
| 543    | 0            | 23MAR15    | 510                | N                 | Y                      | N                | N                     | 11         | 1     | 104.6           | 19             | BRD         |               | NO                    |
| 544    | 0            | 23MAR15    | 515                | N                 | N                      | N                | N                     |            |       |                 |                |             |               | YES                   |
| 545    | 0            | 23MAR15    | 484                | N                 | N                      | N                | N                     |            |       |                 |                |             |               | YES                   |
| 546    | 0            | 23MAR15    | 493                | N                 | N                      | N                | N                     |            |       |                 |                |             |               | YES                   |
| 547    | 0            | 23MAR15    | 433                | N                 | N                      | N                | N                     | 36         | 1     | 103.6           |                |             |               | NO                    |
| 548    | 0            | 23MAR15    | 480                | N                 | N                      | N                | N                     | 11         | 1     | 104.0           | 19             | BRD         |               | NO                    |
| 549    | 0            | 23MAR15    | 469                | N                 | N                      | N                | N                     | 14         | 1     | 106.3           | 29             | BRD         |               | NO                    |
| 55     | 0            | 06MAR15    | 470                | N                 | N                      | N                | Y                     | 10         | 1     | 105.9           |                |             |               | NO                    |
| 550    | 0            | 23MAR15    | 542                | N                 | N                      | N                | N                     | 26         | 1     | 105.7           |                |             |               | NO                    |
| 551    | 0            | 23MAR15    | 490                | N                 | Y                      | N                | Y                     | 36         | 1     | 105.2           |                |             |               | NO                    |
| 552    | 0            | 23MAR15    | 469                | N                 | N                      | N                | N                     | 8          | 1     | 104.4           | 15             | BRD         |               | NO                    |
| 553    | 0            | 23MAR15    | 543                | N                 | Y                      | N                | N                     |            |       |                 |                |             |               | YES                   |
| 554    | 0            | 23MAR15    | 493                | N                 | N                      | N                | Y                     |            |       |                 |                |             |               | YES                   |
| 555    | 0            | 23MAR15    | 570                | N                 | N                      | N                | N                     |            |       |                 |                |             |               | YES                   |
| 556    | 0            | 23MAR15    | 577                | N                 | Y                      | N                | N                     | 7          | 1     | 106.7           |                |             |               | NO                    |
| 557    | 0            | 23MAR15    | 542                | N                 | Y                      | N                | N                     |            |       |                 |                |             |               | YES                   |

DATA HAVE NOT BEEN VERIFIED

[1] Did not qualify for BRD re-treatment, not a BRD mortality and not removed for non-BRD reasons

PHASE IV ALL SPECIES STUDY BOVINE  
 STUDY: A131R-US-13-231  
 TREATMENT SUCCESS RATE  
 SUMMARY BY ANIMAL

09:30 Tuesday, October 27, 2015 17

treatment=T01 test material=DRAXXIN period=Arrival

| animal | day of study | day 0 date | day 0 weight (LBS) | histophilus somni | mannheimia haemolytica | mycoplasma bovis | pasteurella multocida | day of BRD | score | temperature (F) | day of removal | brd related | BRD mortality | treatment success [1] |
|--------|--------------|------------|--------------------|-------------------|------------------------|------------------|-----------------------|------------|-------|-----------------|----------------|-------------|---------------|-----------------------|
| 558    | 0            | 23MAR15    | 602                | N                 | N                      | N                | N                     |            |       |                 |                |             |               | YES                   |
| 559    | 0            | 23MAR15    | 489                | N                 | N                      | N                | N                     |            |       |                 |                |             |               | YES                   |
| 56     | 0            | 06MAR15    | 514                | N                 | N                      | N                | N                     |            |       |                 |                |             |               | YES                   |
| 560    | 0            | 23MAR15    | 555                | N                 | N                      | N                | N                     |            |       |                 |                |             |               | YES                   |
| 561    | 0            | 23MAR15    | 569                | N                 | Y                      | N                | N                     | 20         | 1     | 105.6           |                |             |               | NO                    |
| 562    | 0            | 23MAR15    | 642                | N                 | N                      | N                | N                     |            |       |                 |                |             |               | YES                   |
| 563    | 0            | 23MAR15    | 601                | N                 | N                      | N                | Y                     |            |       |                 |                |             |               | YES                   |
| 564    | 0            | 23MAR15    | 481                | N                 | N                      | N                | N                     | 11         | 2     | 102.1           |                |             |               | NO                    |
| 565    | 0            | 23MAR15    | 621                | N                 | N                      | N                | N                     |            |       |                 |                |             |               | YES                   |
| 566    | 0            | 23MAR15    | 524                | N                 | N                      | N                | N                     |            |       |                 |                |             |               | YES                   |
| 567    | 0            | 23MAR15    | 527                | N                 | N                      | N                | N                     | 13         | 1     | 105.4           |                |             |               | NO                    |
| 568    | 0            | 23MAR15    | 522                | N                 | N                      | N                | N                     |            |       |                 |                |             |               | YES                   |
| 569    | 0            | 23MAR15    | 593                | N                 | N                      | N                | N                     |            |       |                 |                |             |               | YES                   |
| 57     | 0            | 06MAR15    | 496                | N                 | N                      | N                | N                     | 9          | 2     | 103.7           | 15             | BRD         |               | NO                    |
| 570    | 0            | 23MAR15    | 633                | N                 | N                      | N                | N                     | 10         | 1     | 104.3           |                |             |               | NO                    |
| 571    | 0            | 23MAR15    | 501                | N                 | N                      | N                | N                     | 16         | 1     | 104.4           |                |             |               | NO                    |
| 572    | 0            | 23MAR15    | 624                | N                 | N                      | N                | N                     |            |       |                 |                |             |               | YES                   |
| 574    | 0            | 23MAR15    | 514                | N                 | N                      | N                | Y                     |            |       |                 |                |             |               | YES                   |
| 575    | 0            | 23MAR15    | 526                | N                 | N                      | N                | N                     |            |       |                 |                |             |               | YES                   |
| 576    | 0            | 23MAR15    | 563                | N                 | Y                      | N                | N                     | 7          | 1     | 103.8           |                |             |               | NO                    |
| 577    | 0            | 23MAR15    | 563                | N                 | N                      | N                | N                     |            |       |                 |                |             |               | YES                   |
| 578    | 0            | 23MAR15    | 505                | N                 | Y                      | N                | N                     |            |       |                 |                |             |               | YES                   |
| 579    | 0            | 23MAR15    | 578                | N                 | Y                      | N                | Y                     |            |       |                 |                |             |               | YES                   |
| 58     | 0            | 06MAR15    | 557                | N                 | N                      | N                | Y                     |            |       |                 |                |             |               | YES                   |
| 580    | 0            | 23MAR15    | 571                | N                 | N                      | N                | N                     |            |       |                 |                |             |               | YES                   |
| 581    | 0            | 23MAR15    | 571                | N                 | N                      | N                | N                     |            |       |                 |                |             |               | YES                   |
| 582    | 0            | 23MAR15    | 554                | N                 | Y                      | N                | N                     | 29         | 1     | 106.1           |                |             |               | NO                    |
| 583    | 0            | 23MAR15    | 566                | N                 | N                      | N                | N                     | 8          | 1     | 103.6           | 20             | BRD         |               | NO                    |
| 584    | 0            | 23MAR15    | 582                | N                 | N                      | Y                | N                     |            |       |                 |                |             |               | YES                   |
| 585    | 0            | 23MAR15    | 540                | N                 | N                      | N                | N                     | 16         | 1     | 107.0           | 27             | BRD         |               | NO                    |
| 586    | 0            | 23MAR15    | 490                | N                 | N                      | N                | N                     |            |       |                 |                |             |               | YES                   |
| 587    | 0            | 23MAR15    | 583                | N                 | N                      | N                | N                     |            |       |                 |                |             |               | YES                   |
| 588    | 0            | 23MAR15    | 488                | N                 | Y                      | N                | Y                     |            |       |                 |                |             |               | YES                   |
| 589    | 0            | 23MAR15    | 578                | N                 | N                      | N                | N                     |            |       |                 |                |             |               | YES                   |

DATA HAVE NOT BEEN VERIFIED

[1] Did not qualify for BRD re-treatment, not a BRD mortality and not removed for non-BRD reasons

PHASE IV ALL SPECIES STUDY BOVINE  
 STUDY: A131R-US-13-231  
 TREATMENT SUCCESS RATE  
 SUMMARY BY ANIMAL

09:30 Tuesday, October 27, 2015 18

treatment=T01 test material=DRAXXIN period=Arrival

| animal | day of study | day 0 date | day 0 weight (LBS) | histophilus somni | mannheimia haemolytica | mycoplasma bovis | pasteurella multocida | day of BRD | score | temperature (F) | day of removal | brd related | BRD mortality | treatment success [1] |
|--------|--------------|------------|--------------------|-------------------|------------------------|------------------|-----------------------|------------|-------|-----------------|----------------|-------------|---------------|-----------------------|
| 59     | 0            | 06MAR15    | 499                | N                 | N                      | N                | Y                     |            |       |                 |                |             |               | YES                   |
| 590    | 0            | 23MAR15    | 599                | N                 | N                      | N                | N                     |            |       |                 |                |             |               | YES                   |
| 591    | 0            | 23MAR15    | 504                | N                 | N                      | N                | N                     |            |       |                 |                |             |               | YES                   |
| 592    | 0            | 23MAR15    | 561                | N                 | N                      | N                | N                     |            |       |                 |                |             |               | YES                   |
| 593    | 0            | 23MAR15    | 580                | N                 | N                      | N                | Y                     |            |       |                 |                |             |               | YES                   |
| 594    | 0            | 23MAR15    | 607                | N                 | N                      | N                | N                     |            |       |                 |                |             |               | YES                   |
| 595    | 0            | 23MAR15    | 619                | N                 | Y                      | N                | Y                     | 16         | 1     | 104.1           |                |             |               | NO                    |
| 596    | 0            | 23MAR15    | 600                | N                 | N                      | N                | N                     |            |       |                 |                |             |               | YES                   |
| 597    | 0            | 23MAR15    | 535                | N                 | Y                      | N                | Y                     |            |       |                 |                |             |               | YES                   |
| 598    | 0            | 23MAR15    | 581                | N                 | N                      | N                | N                     |            |       |                 |                |             |               | YES                   |
| 599    | 0            | 23MAR15    | 602                | N                 | N                      | N                | N                     |            |       |                 |                |             |               | YES                   |
| 6      | 0            | 06MAR15    | 513                | N                 | N                      | N                | N                     |            |       |                 |                |             |               | YES                   |
| 60     | 0            | 06MAR15    | 482                | N                 | N                      | N                | N                     |            |       |                 |                |             |               | YES                   |
| 600    | 0            | 23MAR15    | 578                | N                 | N                      | N                | N                     |            |       |                 |                |             |               | YES                   |
| 601    | 0            | 23MAR15    | 554                | N                 | N                      | N                | Y                     | 8          | 1     | 103.5           | 31             | BRD         |               | NO                    |
| 602    | 0            | 23MAR15    | 565                | N                 | N                      | N                | N                     |            |       |                 |                |             |               | YES                   |
| 603    | 0            | 23MAR15    | 515                | N                 | N                      | N                | N                     | 7          | 1     | 104.8           | 19             | BRD         |               | NO                    |
| 604    | 0            | 23MAR15    | 564                | N                 | N                      | N                | N                     |            |       |                 |                |             |               | YES                   |
| 605    | 0            | 23MAR15    | 488                | N                 | N                      | N                | N                     |            |       |                 |                |             |               | YES                   |
| 606    | 0            | 23MAR15    | 572                | N                 | Y                      | N                | Y                     |            |       |                 |                |             |               | YES                   |
| 607    | 0            | 23MAR15    | 538                | N                 | N                      | N                | Y                     |            |       |                 |                |             |               | YES                   |
| 608    | 0            | 23MAR15    | 540                | N                 | N                      | N                | Y                     |            |       |                 |                |             |               | YES                   |
| 609    | 0            | 23MAR15    | 586                | N                 | Y                      | N                | N                     |            |       |                 |                |             |               | YES                   |
| 61     | 0            | 06MAR15    | 541                | N                 | N                      | N                | N                     |            |       |                 |                |             |               | YES                   |
| 610    | 0            | 23MAR15    | 498                | N                 | N                      | N                | N                     |            |       |                 |                |             |               | YES                   |
| 611    | 0            | 23MAR15    | 580                | N                 | N                      | N                | N                     |            |       |                 |                |             |               | YES                   |
| 612    | 0            | 23MAR15    | 549                | N                 | Y                      | N                | N                     |            |       |                 |                |             |               | YES                   |
| 613    | 0            | 23MAR15    | 571                | N                 | N                      | N                | N                     |            |       |                 |                |             |               | YES                   |
| 614    | 0            | 23MAR15    | 580                | N                 | Y                      | N                | N                     |            |       |                 |                |             |               | YES                   |
| 615    | 0            | 23MAR15    | 510                | N                 | N                      | N                | N                     | 7          | 1     | 103.7           | 16             | BRD         |               | NO                    |
| 616    | 0            | 23MAR15    | 546                | N                 | Y                      | N                | N                     |            |       |                 |                |             |               | YES                   |
| 617    | 0            | 23MAR15    | 600                | N                 | Y                      | N                | N                     | 28         | 1     | 105.1           |                |             |               | NO                    |
| 618    | 0            | 23MAR15    | 516                | N                 | Y                      | N                | N                     | 7          | 1     | 104.8           |                |             |               | NO                    |
| 619    | 0            | 23MAR15    | 588                | N                 | Y                      | N                | N                     | 16         | 1     | 104.7           | 24             | BRD         |               | NO                    |

DATA HAVE NOT BEEN VERIFIED

[1] Did not qualify for BRD re-treatment, not a BRD mortality and not removed for non-BRD reasons

PHASE IV ALL SPECIES STUDY BOVINE  
 STUDY: A131R-US-13-231  
 TREATMENT SUCCESS RATE  
 SUMMARY BY ANIMAL

09:30 Tuesday, October 27, 2015 19

treatment=T01 test material=DRAXXIN period=Arrival

| animal | day of study | day 0 date | day 0 weight (LBS) | histophilus somni | mannheimia haemolytica | mycoplasma bovis | pasteurella multocida | day of BRD | score | temperature (F) | day of removal | brd related | BRD mortality | treatment success [1] |
|--------|--------------|------------|--------------------|-------------------|------------------------|------------------|-----------------------|------------|-------|-----------------|----------------|-------------|---------------|-----------------------|
| 62     | 0            | 06MAR15    | 444                | N                 | N                      | N                | N                     | 24         | 2     | 103.4           |                |             |               | NO                    |
| 620    | 0            | 23MAR15    | 547                | N                 | Y                      | N                | N                     |            |       |                 |                |             |               | YES                   |
| 621    | 0            | 23MAR15    | 595                | N                 | N                      | N                | N                     |            |       |                 |                |             |               | YES                   |
| 622    | 0            | 23MAR15    | 570                | N                 | N                      | N                | N                     | 13         | 1     | 103.5           |                |             |               | NO                    |
| 623    | 0            | 23MAR15    | 591                | N                 | Y                      | N                | N                     |            |       |                 |                |             |               | YES                   |
| 624    | 0            | 23MAR15    | 548                | N                 | N                      | N                | Y                     |            |       |                 |                |             |               | YES                   |
| 625    | 0            | 23MAR15    | 497                | N                 | N                      | N                | N                     | 11         | 1     | 104.0           |                |             |               | NO                    |
| 626    | 0            | 23MAR15    | 490                | N                 | N                      | N                | Y                     | 16         | 1     | 104.3           |                |             |               | NO                    |
| 627    | 0            | 23MAR15    | 510                | N                 | N                      | N                | N                     |            |       |                 |                |             |               | YES                   |
| 628    | 0            | 23MAR15    | 599                | N                 | N                      | N                | N                     |            |       |                 |                |             |               | YES                   |
| 629    | 0            | 23MAR15    | 560                | N                 | N                      | N                | N                     |            |       |                 |                |             |               | YES                   |
| 63     | 0            | 06MAR15    | 407                | N                 | N                      | N                | N                     |            |       |                 |                |             |               | YES                   |
| 630    | 0            | 23MAR15    | 550                | N                 | Y                      | N                | N                     | 24         | 1     | 104.2           |                |             |               | NO                    |
| 631    | 0            | 23MAR15    | 568                | N                 | Y                      | N                | N                     | 7          | 1     | 104.6           | 14             | BRD         |               | NO                    |
| 632    | 0            | 23MAR15    | 558                | N                 | N                      | N                | Y                     |            |       |                 |                |             |               | YES                   |
| 633    | 0            | 23MAR15    | 613                | N                 | N                      | N                | N                     |            |       |                 |                |             |               | YES                   |
| 634    | 0            | 23MAR15    | 534                | N                 | Y                      | N                | N                     |            |       |                 |                |             |               | YES                   |
| 635    | 0            | 23MAR15    | 557                | N                 | N                      | N                | N                     |            |       |                 |                |             |               | YES                   |
| 636    | 0            | 23MAR15    | 573                | N                 | N                      | N                | N                     | 8          | 1     | 104.5           |                |             |               | NO                    |
| 637    | 0            | 23MAR15    | 526                | N                 | Y                      | N                | N                     |            |       |                 |                |             |               | YES                   |
| 638    | 0            | 23MAR15    | 550                | N                 | N                      | N                | N                     |            |       |                 |                |             |               | YES                   |
| 639    | 0            | 23MAR15    | 566                | N                 | N                      | N                | N                     |            |       |                 |                |             |               | YES                   |
| 64     | 0            | 06MAR15    | 484                | N                 | N                      | N                | N                     | 10         | 2     | 103.1           |                |             |               | NO                    |
| 640    | 0            | 23MAR15    | 505                | N                 | N                      | N                | N                     |            |       |                 |                |             |               | YES                   |
| 641    | 0            | 23MAR15    | 588                | N                 | Y                      | N                | N                     |            |       |                 |                |             |               | YES                   |
| 642    | 0            | 23MAR15    | 490                | N                 | N                      | N                | N                     |            |       |                 |                |             |               | YES                   |
| 643    | 0            | 23MAR15    | 538                | N                 | N                      | N                | N                     |            |       |                 |                |             |               | YES                   |
| 644    | 0            | 25MAR15    | 402                | N                 | N                      | N                | N                     | 15         | 1     | 104.0           | 22             | BRD         |               | NO                    |
| 645    | 0            | 25MAR15    | 429                | N                 | N                      | N                | N                     | 14         | 1     | 103.5           |                |             |               | NO                    |
| 646    | 0            | 25MAR15    | 394                | N                 | N                      | N                | N                     |            |       |                 |                |             |               | YES                   |
| 647    | 0            | 25MAR15    | 317                | N                 | N                      | N                | N                     |            |       |                 |                |             |               | YES                   |
| 648    | 0            | 25MAR15    | 480                | N                 | N                      | N                | N                     |            |       |                 |                |             |               | YES                   |
| 649    | 0            | 25MAR15    | 440                | N                 | N                      | N                | N                     |            |       |                 |                |             |               | YES                   |
| 65     | 0            | 06MAR15    | 503                | N                 | N                      | N                | Y                     | 11         | 1     | 103.6           | 17             | BRD         |               | NO                    |

DATA HAVE NOT BEEN VERIFIED

[1] Did not qualify for BRD re-treatment, not a BRD mortality and not removed for non-BRD reasons

PHASE IV ALL SPECIES STUDY BOVINE  
 STUDY: A131R-US-13-231  
 TREATMENT SUCCESS RATE  
 SUMMARY BY ANIMAL

09:30 Tuesday, October 27, 2015 20

treatment=T01 test material=DRAXXIN period=Arrival

| animal | day of study | day 0 date | day 0 weight (LBS) | histophilus somni | mannheimia haemolytica | mycoplasma bovis | pasteurella multocida | day of BRD | score | temperature (F) | day of removal | brd related | BRD mortality | treatment success [1] |
|--------|--------------|------------|--------------------|-------------------|------------------------|------------------|-----------------------|------------|-------|-----------------|----------------|-------------|---------------|-----------------------|
| 650    | 0            | 25MAR15    | 341                | N                 | N                      | N                | N                     |            |       |                 |                |             |               | YES                   |
| 651    | 0            | 25MAR15    | 410                | N                 | N                      | N                | N                     | 16         | 1     | 104.9           |                |             |               | NO                    |
| 652    | 0            | 25MAR15    | 423                | N                 | N                      | N                | N                     |            |       |                 |                |             |               | YES                   |
| 653    | 0            | 25MAR15    | 372                | N                 | N                      | N                | N                     | 13         | 1     | 106.3           | 20             | BRD         |               | NO                    |
| 654    | 0            | 25MAR15    | 399                | N                 | N                      | N                | N                     | 14         | 1     | 105.7           | 16             | BRD         |               | NO                    |
| 655    | 0            | 25MAR15    | 393                | N                 | N                      | N                | N                     |            |       |                 |                |             |               | YES                   |
| 656    | 0            | 25MAR15    | 445                | N                 | N                      | N                | N                     | 16         | 1     | 105.6           | 35             | BRD         |               | NO                    |
| 657    | 0            | 25MAR15    | 411                | N                 | N                      | N                | N                     |            |       |                 |                |             |               | YES                   |
| 658    | 0            | 25MAR15    | 425                | N                 | N                      | N                | N                     |            |       |                 |                |             |               | YES                   |
| 659    | 0            | 25MAR15    | 428                | N                 | N                      | N                | N                     |            |       |                 |                |             |               | YES                   |
| 66     | 0            | 06MAR15    | 545                | N                 | N                      | N                | N                     | 7          | 2     | 105.1           | 9              | BRD         |               | NO                    |
| 660    | 0            | 25MAR15    | 430                | N                 | N                      | N                | N                     |            |       |                 |                |             |               | YES                   |
| 661    | 0            | 25MAR15    | 443                | N                 | N                      | N                | N                     |            |       |                 |                |             |               | YES                   |
| 662    | 0            | 25MAR15    | 422                | N                 | N                      | N                | N                     |            |       |                 |                |             |               | YES                   |
| 663    | 0            | 25MAR15    | 428                | Y                 | N                      | N                | N                     |            |       |                 |                |             |               | YES                   |
| 664    | 0            | 25MAR15    | 404                | N                 | N                      | N                | N                     |            |       |                 |                |             |               | YES                   |
| 665    | 0            | 25MAR15    | 437                | N                 | N                      | N                | Y                     | 20         | 1     | 103.5           |                |             |               | NO                    |
| 666    | 0            | 25MAR15    | 425                | N                 | N                      | N                | N                     |            |       |                 |                |             |               | YES                   |
| 667    | 0            | 25MAR15    | 436                | N                 | N                      | N                | N                     |            |       |                 |                |             |               | YES                   |
| 668    | 0            | 25MAR15    | 422                | N                 | N                      | N                | N                     |            |       |                 |                |             |               | YES                   |
| 669    | 0            | 25MAR15    | 405                | N                 | Y                      | N                | N                     |            |       |                 |                |             |               | YES                   |
| 67     | 0            | 06MAR15    | 546                | N                 | N                      | N                | N                     |            |       |                 |                |             |               | YES                   |
| 670    | 0            | 25MAR15    | 370                | N                 | N                      | N                | N                     |            |       |                 |                |             |               | YES                   |
| 671    | 0            | 25MAR15    | 468                | N                 | N                      | N                | N                     |            |       |                 |                |             |               | YES                   |
| 672    | 0            | 25MAR15    | 450                | N                 | N                      | N                | N                     |            |       |                 |                |             |               | YES                   |
| 673    | 0            | 25MAR15    | 418                | N                 | N                      | N                | N                     |            |       |                 |                |             |               | YES                   |
| 674    | 0            | 25MAR15    | 422                | N                 | N                      | N                | N                     |            |       |                 |                |             |               | YES                   |
| 675    | 0            | 25MAR15    | 455                | N                 | N                      | N                | N                     | 16         | 1     | 105.8           |                |             |               | NO                    |
| 676    | 0            | 25MAR15    | 462                | N                 | N                      | N                | N                     |            |       |                 |                |             |               | YES                   |
| 677    | 0            | 25MAR15    | 423                | N                 | N                      | N                | N                     |            |       |                 |                |             |               | YES                   |
| 678    | 0            | 25MAR15    | 346                | N                 | N                      | N                | N                     |            |       |                 |                |             |               | YES                   |
| 679    | 0            | 25MAR15    | 471                | N                 | N                      | N                | N                     |            |       |                 |                |             |               | YES                   |
| 68     | 0            | 06MAR15    | 590                | N                 | Y                      | N                | N                     |            |       |                 |                |             |               | YES                   |
| 680    | 0            | 25MAR15    | 378                | N                 | N                      | N                | N                     | 16         | 1     | 104.5           |                |             |               | NO                    |

DATA HAVE NOT BEEN VERIFIED

[1] Did not qualify for BRD re-treatment, not a BRD mortality and not removed for non-BRD reasons

PHASE IV ALL SPECIES STUDY BOVINE  
 STUDY: A131R-US-13-231  
 TREATMENT SUCCESS RATE  
 SUMMARY BY ANIMAL

treatment=T01 test material=DRAXXIN period=Arrival

| animal | day of study | day 0 date | day 0 weight (LBS) | histophilus somni | mannheimia haemolytica | mycoplasma bovis | pasteurella multocida | day of BRD | score | temperature (F) | day of removal | brd related | BRD mortality | treatment success [1] |
|--------|--------------|------------|--------------------|-------------------|------------------------|------------------|-----------------------|------------|-------|-----------------|----------------|-------------|---------------|-----------------------|
| 681    | 0            | 25MAR15    | 430                | N                 | N                      | N                | N                     |            |       |                 |                |             |               | YES                   |
| 682    | 0            | 25MAR15    | 414                | N                 | N                      | N                | N                     |            |       |                 |                |             |               | YES                   |
| 683    | 0            | 25MAR15    | 465                | N                 | N                      | N                | N                     |            |       |                 |                |             |               | YES                   |
| 684    | 0            | 25MAR15    | 355                | N                 | N                      | N                | N                     |            |       |                 |                |             |               | YES                   |
| 685    | 0            | 25MAR15    | 427                | Y                 | N                      | N                | N                     |            |       |                 |                |             |               | YES                   |
| 686    | 0            | 25MAR15    | 479                | N                 | N                      | N                | N                     |            |       |                 |                |             |               | YES                   |
| 687    | 0            | 25MAR15    | 418                | Y                 | N                      | N                | Y                     |            |       |                 |                |             |               | YES                   |
| 688    | 0            | 25MAR15    | 485                | N                 | N                      | N                | N                     |            |       |                 |                |             |               | YES                   |
| 689    | 0            | 25MAR15    | 427                | N                 | N                      | N                | Y                     |            |       |                 |                |             |               | YES                   |
| 69     | 0            | 06MAR15    | 497                | N                 | Y                      | N                | N                     | 10         | 1     | 105.3           | 18             | BRD         |               | NO                    |
| 690    | 0            | 25MAR15    | 403                | N                 | N                      | N                | N                     |            |       |                 |                |             |               | YES                   |
| 691    | 0            | 25MAR15    | 422                | N                 | N                      | N                | N                     |            |       |                 |                |             |               | YES                   |
| 692    | 0            | 25MAR15    | 413                | N                 | N                      | N                | N                     | 17         | 1     | 103.8           |                |             |               | NO                    |
| 693    | 0            | 25MAR15    | 433                | N                 | N                      | N                | N                     | 15         | 1     | 104.0           | 22             | BRD         |               | NO                    |
| 694    | 0            | 25MAR15    | 407                | N                 | Y                      | N                | N                     |            |       |                 |                |             |               | YES                   |
| 695    | 0            | 25MAR15    | 428                | N                 | N                      | N                | N                     | 13         | 1     | 104.8           |                |             |               | NO                    |
| 696    | 0            | 25MAR15    | 384                | N                 | N                      | N                | N                     |            |       |                 |                |             |               | YES                   |
| 697    | 0            | 25MAR15    | 436                | N                 | N                      | N                | N                     |            |       |                 |                |             |               | YES                   |
| 698    | 0            | 25MAR15    | 448                | N                 | N                      | N                | N                     |            |       |                 |                |             |               | YES                   |
| 699    | 0            | 25MAR15    | 385                | N                 | N                      | N                | N                     |            |       |                 |                |             |               | YES                   |
| 7      | 0            | 06MAR15    | 481                | N                 | N                      | N                | N                     | 7          | 2     | 104.2           |                |             |               | NO                    |
| 70     | 0            | 06MAR15    | 540                | N                 | N                      | N                | N                     | 10         | 1     | 103.6           |                |             |               | NO                    |
| 700    | 0            | 25MAR15    | 454                | N                 | N                      | N                | N                     |            |       |                 |                |             |               | YES                   |
| 701    | 0            | 25MAR15    | 426                | N                 | N                      | N                | N                     |            |       |                 |                |             |               | YES                   |
| 702    | 0            | 25MAR15    | 382                | N                 | N                      | N                | N                     |            |       |                 |                |             |               | YES                   |
| 703    | 0            | 25MAR15    | 426                | N                 | N                      | N                | N                     |            |       |                 |                |             |               | YES                   |
| 704    | 0            | 25MAR15    | 390                | N                 | N                      | N                | N                     |            |       |                 |                |             |               | YES                   |
| 705    | 0            | 25MAR15    | 400                | N                 | N                      | N                | N                     | 22         | 1     | 103.8           |                |             |               | NO                    |
| 706    | 0            | 25MAR15    | 424                | N                 | N                      | N                | N                     | 15         | 1     | 107.9           | 22             | BRD         |               | NO                    |
| 707    | 0            | 25MAR15    | 402                | N                 | N                      | N                | N                     |            |       |                 |                |             |               | YES                   |
| 708    | 0            | 25MAR15    | 407                | N                 | N                      | N                | N                     | 16         | 1     | 106.2           |                |             |               | NO                    |
| 709    | 0            | 25MAR15    | 452                | N                 | N                      | N                | N                     |            |       |                 |                |             |               | YES                   |
| 71     | 0            | 06MAR15    | 538                | N                 | N                      | N                | N                     |            |       |                 |                |             |               | YES                   |
| 710    | 0            | 25MAR15    | 398                | N                 | N                      | N                | N                     |            |       |                 |                |             |               | YES                   |

DATA HAVE NOT BEEN VERIFIED

[1] Did not qualify for BRD re-treatment, not a BRD mortality and not removed for non-BRD reasons

PHASE IV ALL SPECIES STUDY BOVINE  
 STUDY: A131R-US-13-231  
 TREATMENT SUCCESS RATE  
 SUMMARY BY ANIMAL

treatment=T01 test material=DRAXXIN period=Arrival

| animal | day of study | day 0 date | day 0 weight (LBS) | histophilus somni | mannheimia haemolytica | mycoplasma bovis | pasteurella multocida | day of BRD | score | temperature (F) | day of removal | brd related | BRD mortality | treatment success [1] |
|--------|--------------|------------|--------------------|-------------------|------------------------|------------------|-----------------------|------------|-------|-----------------|----------------|-------------|---------------|-----------------------|
| 711    | 0            | 25MAR15    | 430                | N                 | N                      | N                | Y                     |            |       |                 |                |             |               | YES                   |
| 712    | 0            | 25MAR15    | 355                | N                 | N                      | N                | N                     | 22         | 1     | 104.9           |                |             |               | NO                    |
| 713    | 0            | 25MAR15    | 409                | N                 | N                      | N                | N                     | 15         | 1     | 107.0           | 22             | BRD         |               | NO                    |
| 714    | 0            | 25MAR15    | 395                | Y                 | N                      | N                | N                     |            |       |                 |                |             |               | YES                   |
| 715    | 0            | 25MAR15    | 449                | N                 | N                      | N                | N                     |            |       |                 |                |             |               | YES                   |
| 716    | 0            | 25MAR15    | 408                | N                 | Y                      | N                | N                     |            |       |                 |                |             |               | YES                   |
| 717    | 0            | 25MAR15    | 493                | N                 | N                      | N                | N                     |            |       |                 |                |             |               | YES                   |
| 718    | 0            | 25MAR15    | 451                | N                 | N                      | N                | N                     |            |       |                 |                |             |               | YES                   |
| 72     | 0            | 06MAR15    | 484                | N                 | N                      | N                | N                     | 11         | 1     | 104.4           | 17             | BRD         |               | NO                    |
| 720    | 0            | 25MAR15    | 426                | N                 | N                      | N                | N                     |            |       |                 |                |             |               | YES                   |
| 721    | 0            | 25MAR15    | 412                | N                 | N                      | N                | N                     | 15         | 1     | 107.7           | 22             | BRD         |               | NO                    |
| 722    | 0            | 25MAR15    | 378                | N                 | N                      | N                | N                     |            |       |                 |                |             |               | YES                   |
| 723    | 0            | 25MAR15    | 380                | N                 | N                      | N                | N                     |            |       |                 |                |             |               | YES                   |
| 724    | 0            | 25MAR15    | 380                | N                 | N                      | N                | N                     | 35         | 1     | 105.3           |                |             |               | NO                    |
| 725    | 0            | 25MAR15    | 373                | N                 | N                      | N                | N                     |            |       |                 |                |             |               | YES                   |
| 726    | 0            | 25MAR15    | 415                | N                 | N                      | N                | N                     |            |       |                 |                |             |               | YES                   |
| 727    | 0            | 25MAR15    | 401                | N                 | N                      | N                | N                     |            |       |                 |                |             |               | YES                   |
| 728    | 0            | 25MAR15    | 394                | N                 | N                      | N                | N                     | 12         | 1     | 105.8           | 21             | BRD         |               | NO                    |
| 729    | 0            | 25MAR15    | 371                | N                 | N                      | N                | Y                     |            |       |                 |                |             |               | YES                   |
| 73     | 0            | 06MAR15    | 508                | N                 | N                      | N                | N                     | 12         | 1     | 104.9           | 19             | BRD         |               | NO                    |
| 730    | 0            | 25MAR15    | 363                | N                 | N                      | N                | N                     |            |       |                 |                |             |               | YES                   |
| 731    | 0            | 25MAR15    | 410                | N                 | N                      | N                | N                     |            |       |                 |                |             |               | YES                   |
| 733    | 0            | 25MAR15    | 382                | N                 | N                      | N                | Y                     |            |       |                 |                |             |               | YES                   |
| 734    | 0            | 25MAR15    | 458                | N                 | N                      | N                | N                     |            |       |                 |                |             |               | YES                   |
| 735    | 0            | 25MAR15    | 449                | N                 | N                      | N                | N                     |            |       |                 |                |             |               | YES                   |
| 736    | 0            | 25MAR15    | 431                | N                 | N                      | N                | N                     |            |       |                 |                |             |               | YES                   |
| 737    | 0            | 25MAR15    | 340                | N                 | N                      | N                | N                     | 14         | 1     | 105.8           |                |             |               | NO                    |
| 738    | 0            | 25MAR15    | 410                | N                 | N                      | N                | N                     |            |       |                 |                |             |               | YES                   |
| 739    | 0            | 25MAR15    | 364                | N                 | N                      | N                | N                     |            |       |                 |                |             |               | YES                   |
| 74     | 0            | 06MAR15    | 420                | N                 | N                      | N                | Y                     | 7          | 1     | 103.9           |                |             |               | NO                    |
| 740    | 0            | 25MAR15    | 428                | N                 | N                      | N                | N                     |            |       |                 |                |             |               | YES                   |
| 741    | 0            | 25MAR15    | 443                | N                 | N                      | N                | N                     |            |       |                 |                |             |               | YES                   |
| 742    | 0            | 25MAR15    | 440                | N                 | N                      | N                | N                     |            |       |                 |                |             |               | YES                   |
| 743    | 0            | 25MAR15    | 424                | N                 | Y                      | Y                | N                     |            |       |                 |                |             |               | YES                   |

DATA HAVE NOT BEEN VERIFIED

[1] Did not qualify for BRD re-treatment, not a BRD mortality and not removed for non-BRD reasons

PHASE IV ALL SPECIES STUDY BOVINE  
 STUDY: A131R-US-13-231  
 TREATMENT SUCCESS RATE  
 SUMMARY BY ANIMAL

treatment=T01 test material=DRAXXIN period=Arrival

| animal | day of study | day 0 date | day 0 weight (LBS) | histophilus somni | mannheimia haemolytica | mycoplasma bovis | pasteurella multocida | day of BRD | score | temperature (F) | day of removal | brd related | BRD mortality | treatment success [1] |
|--------|--------------|------------|--------------------|-------------------|------------------------|------------------|-----------------------|------------|-------|-----------------|----------------|-------------|---------------|-----------------------|
| 744    | 0            | 25MAR15    | 440                | N                 | N                      | N                | N                     |            |       |                 |                |             |               | YES                   |
| 745    | 0            | 25MAR15    | 450                | N                 | N                      | N                | N                     | 14         | 1     | 106.6           |                |             |               | NO                    |
| 746    | 0            | 25MAR15    | 432                | N                 | N                      | N                | Y                     |            |       |                 |                |             |               | YES                   |
| 747    | 0            | 25MAR15    | 442                | N                 | N                      | N                | N                     |            |       |                 |                |             |               | YES                   |
| 748    | 0            | 25MAR15    | 434                | N                 | N                      | N                | N                     | 14         | 1     | 105.1           |                |             |               | NO                    |
| 749    | 0            | 25MAR15    | 443                | N                 | N                      | N                | N                     |            |       |                 |                |             |               | YES                   |
| 75     | 0            | 06MAR15    | 534                | N                 | N                      | N                | N                     |            |       |                 |                |             |               | YES                   |
| 750    | 0            | 25MAR15    | 460                | N                 | N                      | N                | N                     |            |       |                 |                |             |               | YES                   |
| 751    | 0            | 25MAR15    | 400                | N                 | N                      | N                | N                     |            |       |                 |                |             |               | YES                   |
| 752    | 0            | 25MAR15    | 434                | N                 | N                      | N                | N                     | 14         | 1     | 106.7           | 24             | BRD         |               | NO                    |
| 753    | 0            | 25MAR15    | 404                | N                 | N                      | N                | N                     | 9          | 1     | 105.7           |                |             |               | NO                    |
| 754    | 0            | 25MAR15    | 349                | N                 | N                      | N                | N                     | 18         | 1     | 106.7           |                |             |               | NO                    |
| 755    | 0            | 25MAR15    | 403                | N                 | N                      | N                | N                     |            |       |                 |                |             |               | YES                   |
| 757    | 0            | 25MAR15    | 425                | N                 | N                      | N                | N                     |            |       |                 |                |             |               | YES                   |
| 758    | 0            | 25MAR15    | 435                | N                 | N                      | N                | N                     |            |       |                 |                |             |               | YES                   |
| 759    | 0            | 25MAR15    | 429                | N                 | N                      | N                | N                     |            |       |                 |                |             |               | YES                   |
| 760    | 0            | 26MAR15    | 511                | N                 | N                      | N                | N                     | 13         | 1     | 105.1           | 34             | BRD         |               | NO                    |
| 761    | 0            | 26MAR15    | 498                | N                 | N                      | N                | N                     |            |       |                 |                |             |               | YES                   |
| 762    | 0            | 26MAR15    | 466                | N                 | N                      | N                | N                     |            |       |                 |                |             |               | YES                   |
| 763    | 0            | 26MAR15    | 503                | N                 | N                      | Y                | N                     |            |       |                 |                |             |               | YES                   |
| 764    | 0            | 26MAR15    | 514                | N                 | N                      | N                | N                     |            |       |                 |                |             |               | YES                   |
| 765    | 0            | 26MAR15    | 504                | N                 | N                      | N                | Y                     | 13         | 1     | 106.8           |                |             |               | NO                    |
| 766    | 0            | 26MAR15    | 485                | N                 | N                      | N                | N                     | 18         | 1     | 105.6           |                |             |               | NO                    |
| 767    | 0            | 26MAR15    | 508                | N                 | N                      | N                | Y                     |            |       |                 |                |             |               | YES                   |
| 768    | 0            | 26MAR15    | 456                | N                 | N                      | N                | N                     |            |       |                 |                |             |               | YES                   |
| 769    | 0            | 26MAR15    | 475                | N                 | N                      | N                | N                     | 30         | 1     | 104.8           |                |             |               | NO                    |
| 77     | 0            | 06MAR15    | 485                | N                 | N                      | N                | N                     |            |       |                 |                |             |               | YES                   |
| 770    | 0            | 26MAR15    | 525                | N                 | Y                      | N                | N                     |            |       |                 |                |             |               | YES                   |
| 771    | 0            | 26MAR15    | 492                | N                 | N                      | N                | N                     | 10         | 1     | 103.5           |                |             |               | NO                    |
| 772    | 0            | 26MAR15    | 558                | N                 | N                      | N                | N                     | 18         | 1     | 105.7           | 25             | BRD         |               | NO                    |
| 773    | 0            | 26MAR15    | 454                | N                 | N                      | N                | N                     | 10         | 1     | 104.5           |                |             |               | NO                    |
| 774    | 0            | 26MAR15    | 498                | N                 | N                      | N                | N                     |            |       |                 |                |             |               | YES                   |
| 775    | 0            | 26MAR15    | 466                | N                 | N                      | N                | N                     | 8          | 1     | 106.5           | 12             | BRD         |               | NO                    |
| 776    | 0            | 26MAR15    | 492                | N                 | N                      | N                | N                     |            |       |                 |                |             |               | YES                   |

DATA HAVE NOT BEEN VERIFIED

[1] Did not qualify for BRD re-treatment, not a BRD mortality and not removed for non-BRD reasons



PHASE IV ALL SPECIES STUDY BOVINE  
 STUDY: A131R-US-13-231  
 TREATMENT SUCCESS RATE  
 SUMMARY BY ANIMAL

treatment=T01 test material=DRAXXIN period=Arrival

| animal | day of study | day 0 date | day 0 weight (LBS) | histophilus somni | mannheimia haemolytica | mycoplasma bovis | pasteurella multocida | day of BRD | score | temperature (F) | day of removal | brd related | BRD mortality | treatment success [1] |
|--------|--------------|------------|--------------------|-------------------|------------------------|------------------|-----------------------|------------|-------|-----------------|----------------|-------------|---------------|-----------------------|
| 777    | 0            | 26MAR15    | 519                | N                 | N                      | N                | N                     |            |       |                 |                |             |               | YES                   |
| 778    | 0            | 26MAR15    | 569                | N                 | N                      | N                | N                     |            |       |                 |                |             |               | YES                   |
| 779    | 0            | 26MAR15    | 467                | N                 | N                      | N                | N                     | 13         | 1     | 104.5           | 20             | BRD         |               | NO                    |
| 78     | 0            | 06MAR15    | 481                | N                 | N                      | N                | N                     |            |       |                 |                |             |               | YES                   |
| 780    | 0            | 26MAR15    | 483                | N                 | N                      | N                | N                     |            |       |                 |                |             |               | YES                   |
| 781    | 0            | 26MAR15    | 483                | N                 | N                      | N                | N                     |            |       |                 |                |             |               | YES                   |
| 782    | 0            | 26MAR15    | 432                | N                 | N                      | N                | N                     |            |       |                 |                |             |               | YES                   |
| 783    | 0            | 26MAR15    | 505                | N                 | N                      | N                | N                     | 14         | 2     | 107.3           | 21             | BRD         |               | NO                    |
| 784    | 0            | 26MAR15    | 509                | N                 | N                      | N                | N                     |            |       |                 |                |             |               | YES                   |
| 785    | 0            | 26MAR15    | 464                | N                 | N                      | N                | N                     |            |       |                 |                |             |               | YES                   |
| 786    | 0            | 26MAR15    | 499                | N                 | N                      | N                | N                     | 17         | 2     | 105.9           | 33             | BRD         |               | NO                    |
| 787    | 0            | 26MAR15    | 464                | N                 | N                      | N                | N                     |            |       |                 |                |             |               | YES                   |
| 788    | 0            | 26MAR15    | 569                | N                 | N                      | N                | N                     |            |       |                 |                |             |               | YES                   |
| 789    | 0            | 26MAR15    | 574                | N                 | N                      | N                | N                     |            |       |                 |                |             |               | YES                   |
| 79     | 0            | 06MAR15    | 500                | N                 | N                      | N                | N                     |            |       |                 |                |             |               | YES                   |
| 790    | 0            | 26MAR15    | 448                | N                 | N                      | N                | N                     |            |       |                 |                |             |               | YES                   |
| 791    | 0            | 26MAR15    | 518                | N                 | N                      | N                | N                     |            |       |                 |                |             |               | YES                   |
| 792    | 0            | 26MAR15    | 507                | N                 | N                      | N                | N                     | 10         | 1     | 104.3           | 15             | BRD         |               | NO                    |
| 793    | 0            | 26MAR15    | 532                | N                 | N                      | N                | N                     | 9          | 1     | 105.8           |                |             |               | NO                    |
| 794    | 0            | 26MAR15    | 462                | N                 | N                      | N                | Y                     |            |       |                 |                |             |               | YES                   |
| 795    | 0            | 26MAR15    | 535                | N                 | N                      | N                | N                     | 16         | 2     | 106.9           |                |             |               | NO                    |
| 796    | 0            | 26MAR15    | 439                | N                 | Y                      | N                | N                     |            |       |                 |                |             |               | YES                   |
| 797    | 0            | 26MAR15    | 635                | N                 | N                      | N                | N                     |            |       |                 |                |             |               | YES                   |
| 798    | 0            | 26MAR15    | 545                | N                 | N                      | N                | N                     | 8          | 1     | 105.0           | 24             | BRD         |               | NO                    |
| 799    | 0            | 26MAR15    | 500                | N                 | N                      | N                | N                     | 11         | 2     | 105.2           | 18             | BRD         |               | NO                    |
| 8      | 0            | 06MAR15    | 522                | N                 | N                      | N                | N                     | 14         | 1     | 104.6           |                |             |               | NO                    |
| 80     | 0            | 06MAR15    | 497                | N                 | N                      | N                | N                     | 7          | 1     | 103.6           | 12             | BRD         |               | NO                    |
| 800    | 0            | 26MAR15    | 510                | N                 | N                      | N                | N                     | 12         | 1     | 104.7           |                |             |               | NO                    |
| 801    | 0            | 26MAR15    | 580                | N                 | N                      | N                | N                     |            |       |                 |                |             |               | YES                   |
| 802    | 0            | 26MAR15    | 487                | N                 | N                      | N                | N                     | 7          | 1     | 104.8           |                |             |               | NO                    |
| 803    | 0            | 26MAR15    | 511                | N                 | N                      | N                | N                     |            |       |                 |                |             |               | YES                   |
| 804    | 0            | 26MAR15    | 562                | N                 | N                      | N                | N                     |            |       |                 |                |             |               | YES                   |
| 805    | 0            | 26MAR15    | 474                | N                 | N                      | N                | N                     | 9          | 1     | 103.5           | 21             | BRD         |               | NO                    |
| 806    | 0            | 26MAR15    | 482                | N                 | N                      | N                | N                     | 11         | 1     | 105.6           | 19             | BRD         |               | NO                    |

DATA HAVE NOT BEEN VERIFIED

[1] Did not qualify for BRD re-treatment, not a BRD mortality and not removed for non-BRD reasons

PHASE IV ALL SPECIES STUDY BOVINE  
 STUDY: A131R-US-13-231  
 TREATMENT SUCCESS RATE  
 SUMMARY BY ANIMAL

treatment=T01 test material=DRAXXIN period=Arrival

| animal | day of study | day 0 date | day 0 weight (LBS) | histophilus somni | mannheimia haemolytica | mycoplasma bovis | pasteurella multocida | day of BRD | score | temperature (F) | day of removal | brd related | BRD mortality | treatment success [1] |
|--------|--------------|------------|--------------------|-------------------|------------------------|------------------|-----------------------|------------|-------|-----------------|----------------|-------------|---------------|-----------------------|
| 807    | 0            | 26MAR15    | 520                | N                 | N                      | N                | N                     | 7          | 1     | 104.9           | 14             | BRD         |               | NO                    |
| 808    | 0            | 26MAR15    | 470                | N                 | Y                      | N                | Y                     |            |       |                 |                |             |               | YES                   |
| 809    | 0            | 26MAR15    | 513                | N                 | N                      | N                | N                     | 13         | 1     | 104.0           | 17             | BRD         |               | NO                    |
| 81     | 0            | 06MAR15    | 558                | N                 | N                      | N                | N                     |            |       |                 |                |             |               | YES                   |
| 810    | 0            | 26MAR15    | 628                | N                 | N                      | N                | N                     |            |       |                 |                |             |               | YES                   |
| 811    | 0            | 26MAR15    | 520                | N                 | N                      | N                | N                     |            |       |                 |                |             |               | YES                   |
| 812    | 0            | 26MAR15    | 514                | N                 | N                      | N                | N                     |            |       |                 |                |             |               | YES                   |
| 813    | 0            | 26MAR15    | 506                | N                 | N                      | N                | N                     |            |       |                 |                |             |               | YES                   |
| 814    | 0            | 26MAR15    | 500                | N                 | N                      | N                | N                     | 26         | 1     | 106.1           | 33             | BRD         |               | NO                    |
| 815    | 0            | 26MAR15    | 515                | N                 | N                      | N                | N                     | 7          | 1     | 104.2           | 14             | BRD         |               | NO                    |
| 816    | 0            | 26MAR15    | 510                | N                 | N                      | N                | N                     |            |       |                 |                |             |               | YES                   |
| 817    | 0            | 26MAR15    | 424                | N                 | N                      | N                | N                     |            |       |                 |                |             |               | YES                   |
| 818    | 0            | 26MAR15    | 450                | N                 | N                      | N                | N                     | 8          | 1     | 105.7           | 13             | BRD         |               | NO                    |
| 819    | 0            | 26MAR15    | 423                | N                 | N                      | N                | N                     | 8          | 1     | 104.9           | 17             | BRD         |               | NO                    |
| 82     | 0            | 06MAR15    | 541                | N                 | N                      | N                | N                     |            |       |                 |                |             |               | YES                   |
| 820    | 0            | 26MAR15    | 476                | N                 | N                      | N                | N                     |            |       |                 |                |             |               | YES                   |
| 821    | 0            | 26MAR15    | 418                | N                 | N                      | N                | N                     |            |       |                 |                |             |               | YES                   |
| 822    | 0            | 26MAR15    | 436                | N                 | N                      | N                | N                     |            |       |                 |                |             |               | YES                   |
| 823    | 0            | 26MAR15    | 507                | N                 | N                      | N                | N                     |            |       |                 |                |             |               | YES                   |
| 824    | 0            | 26MAR15    | 474                | N                 | N                      | N                | N                     | 8          | 1     | 103.6           | 19             | BRD         |               | NO                    |
| 825    | 0            | 26MAR15    | 539                | N                 | N                      | N                | N                     |            |       |                 |                |             |               | YES                   |
| 826    | 0            | 26MAR15    | 515                | N                 | N                      | N                | N                     |            |       |                 |                |             |               | YES                   |
| 827    | 0            | 26MAR15    | 493                | N                 | N                      | N                | N                     |            |       |                 |                |             |               | YES                   |
| 828    | 0            | 26MAR15    | 485                | N                 | N                      | N                | N                     |            |       |                 |                |             |               | YES                   |
| 829    | 0            | 26MAR15    | 493                | N                 | N                      | N                | N                     | 13         | 1     | 105.8           | 15             | BRD         |               | NO                    |
| 83     | 0            | 06MAR15    | 540                | N                 | Y                      | N                | N                     | 11         | 1     | 103.6           |                |             |               | NO                    |
| 830    | 0            | 26MAR15    | 435                | N                 | N                      | N                | N                     |            |       |                 |                |             |               | YES                   |
| 831    | 0            | 26MAR15    | 455                | N                 | N                      | N                | N                     |            |       |                 |                |             |               | YES                   |
| 832    | 0            | 26MAR15    | 446                | N                 | N                      | N                | N                     | 13         | 1     | 106.2           | 21             | BRD         |               | NO                    |
| 834    | 0            | 26MAR15    | 520                | N                 | N                      | N                | N                     | 7          | 1     | 104.8           |                |             |               | NO                    |
| 836    | 0            | 26MAR15    | 443                | N                 | N                      | N                | N                     | 19         | 1     | 105.4           | 28             | BRD         |               | NO                    |
| 837    | 0            | 26MAR15    | 541                | N                 | N                      | N                | N                     |            |       |                 |                |             |               | YES                   |
| 838    | 0            | 26MAR15    | 501                | N                 | N                      | N                | N                     | 14         | 1     | 104.6           | 21             | BRD         |               | NO                    |
| 839    | 0            | 26MAR15    | 467                | N                 | N                      | N                | N                     |            |       |                 |                |             |               | YES                   |

DATA HAVE NOT BEEN VERIFIED

[1] Did not qualify for BRD re-treatment, not a BRD mortality and not removed for non-BRD reasons

PHASE IV ALL SPECIES STUDY BOVINE  
 STUDY: A131R-US-13-231  
 TREATMENT SUCCESS RATE  
 SUMMARY BY ANIMAL

treatment=T01 test material=DRAXXIN period=Arrival

| animal | day of study | day 0 date | day 0 weight (LBS) | histophilus somni | mannheimia haemolytica | mycoplasma bovis | pasteurella multocida | day of BRD | score | temperature (F) | day of removal | brd related | BRD mortality | treatment success [1] |
|--------|--------------|------------|--------------------|-------------------|------------------------|------------------|-----------------------|------------|-------|-----------------|----------------|-------------|---------------|-----------------------|
| 84     | 0            | 06MAR15    | 460                | N                 | Y                      | N                | Y                     | 7          | 2     | 103.6           |                |             |               | NO                    |
| 840    | 0            | 26MAR15    | 577                | N                 | N                      | N                | N                     |            |       |                 |                |             |               | YES                   |
| 841    | 0            | 26MAR15    | 510                | N                 | N                      | N                | N                     |            |       |                 |                |             |               | YES                   |
| 842    | 0            | 26MAR15    | 442                | N                 | N                      | N                | N                     | 12         | 1     | 107.6           |                |             |               | NO                    |
| 843    | 0            | 26MAR15    | 636                | N                 | N                      | N                | N                     |            |       |                 |                |             |               | YES                   |
| 844    | 0            | 26MAR15    | 598                | N                 | N                      | N                | N                     |            |       |                 |                |             |               | YES                   |
| 845    | 0            | 26MAR15    | 480                | N                 | N                      | N                | N                     |            |       |                 |                |             |               | YES                   |
| 846    | 0            | 26MAR15    | 595                | N                 | N                      | N                | N                     |            |       |                 |                |             |               | YES                   |
| 847    | 0            | 26MAR15    | 437                | N                 | N                      | N                | N                     |            |       |                 |                |             |               | YES                   |
| 848    | 0            | 26MAR15    | 499                | N                 | N                      | N                | Y                     |            |       |                 |                |             |               | YES                   |
| 849    | 0            | 27MAR15    | 566                | N                 | Y                      | N                | N                     |            |       |                 |                |             |               | YES                   |
| 850    | 0            | 27MAR15    | 523                | N                 | N                      | N                | N                     |            |       |                 |                |             |               | YES                   |
| 851    | 0            | 27MAR15    | 482                | N                 | N                      | N                | N                     |            |       |                 |                |             |               | YES                   |
| 852    | 0            | 27MAR15    | 515                | N                 | N                      | N                | N                     | 12         | 1     | 104.6           | 33             | BRD         |               | NO                    |
| 853    | 0            | 27MAR15    | 528                | N                 | N                      | N                | N                     | 15         | 2     | 105.1           |                |             |               | NO                    |
| 854    | 0            | 27MAR15    | 539                | N                 | N                      | N                | N                     | 7          | 1     | 103.6           |                |             |               | NO                    |
| 855    | 0            | 27MAR15    | 522                | N                 | N                      | N                | N                     | 32         | 1     | 103.7           |                |             |               | NO                    |
| 856    | 0            | 27MAR15    | 530                | N                 | N                      | N                | N                     | 7          | 1     | 103.9           |                |             |               | NO                    |
| 857    | 0            | 27MAR15    | 556                | N                 | N                      | N                | N                     |            |       |                 |                |             |               | YES                   |
| 858    | 0            | 27MAR15    | 567                | N                 | N                      | N                | N                     |            |       |                 |                |             |               | YES                   |
| 859    | 0            | 27MAR15    | 523                | N                 | N                      | N                | N                     |            |       |                 |                |             |               | YES                   |
| 86     | 0            | 06MAR15    | 418                | N                 | Y                      | N                | N                     | 13         | 1     | 104.9           | 19             | BRD         |               | NO                    |
| 860    | 0            | 27MAR15    | 540                | N                 | N                      | N                | N                     |            |       |                 |                |             |               | YES                   |
| 861    | 0            | 27MAR15    | 508                | N                 | N                      | Y                | N                     |            |       |                 |                |             |               | YES                   |
| 863    | 0            | 27MAR15    | 535                | N                 | N                      | N                | N                     |            |       |                 |                |             |               | YES                   |
| 864    | 0            | 27MAR15    | 499                | N                 | N                      | N                | N                     |            |       |                 |                |             |               | YES                   |
| 865    | 0            | 27MAR15    | 464                | N                 | N                      | N                | N                     | 11         | 1     | 105.8           | 18             | BRD         |               | NO                    |
| 866    | 0            | 27MAR15    | 595                | N                 | N                      | N                | N                     |            |       |                 |                |             |               | YES                   |
| 867    | 0            | 27MAR15    | 523                | N                 | N                      | N                | N                     | 9          | 1     | 107.8           | 14             | BRD         |               | NO                    |
| 868    | 0            | 27MAR15    | 560                | N                 | N                      | N                | N                     | 7          | 1     | 105.1           | 10             | BRD         | YES           | NO                    |
| 869    | 0            | 27MAR15    | 458                | N                 | N                      | N                | N                     |            |       |                 |                |             |               | YES                   |
| 87     | 0            | 06MAR15    | 444                | N                 | Y                      | N                | N                     | 19         | 1     | 103.5           |                |             |               | NO                    |
| 870    | 0            | 27MAR15    | 492                | N                 | N                      | N                | N                     |            |       |                 |                |             |               | YES                   |
| 871    | 0            | 27MAR15    | 593                | N                 | N                      | N                | N                     |            |       |                 |                |             |               | YES                   |

DATA HAVE NOT BEEN VERIFIED

[1] Did not qualify for BRD re-treatment, not a BRD mortality and not removed for non-BRD reasons

PHASE IV ALL SPECIES STUDY BOVINE  
 STUDY: A131R-US-13-231  
 TREATMENT SUCCESS RATE  
 SUMMARY BY ANIMAL

treatment=T01 test material=DRAXXIN period=Arrival

| animal | day of study | day 0 date | day 0 weight (LBS) | histophilus somni | mannheimia haemolytica | mycoplasma bovis | pasteurella multocida | day of BRD | score | temperature (F) | day of removal | brd related | BRD mortality | treatment success [1] |
|--------|--------------|------------|--------------------|-------------------|------------------------|------------------|-----------------------|------------|-------|-----------------|----------------|-------------|---------------|-----------------------|
| 872    | 0            | 27MAR15    | 534                | N                 | N                      | N                | Y                     | 7          | 1     | 104.2           |                |             |               | NO                    |
| 873    | 0            | 27MAR15    | 538                | N                 | N                      | N                | N                     | 10         | 1     | 105.5           | 12             | BRD         |               | NO                    |
| 874    | 0            | 27MAR15    | 563                | N                 | N                      | N                | N                     | 7          | 1     | 106.3           | 10             | BRD         |               | NO                    |
| 875    | 0            | 27MAR15    | 519                | N                 | N                      | N                | Y                     |            |       |                 |                |             |               | YES                   |
| 876    | 0            | 27MAR15    | 538                | N                 | N                      | N                | N                     | 25         | 1     | 104.8           | 40             | BRD         |               | NO                    |
| 877    | 0            | 27MAR15    | 542                | N                 | N                      | N                | N                     | 9          | 1     | 104.1           | 19             | BRD         |               | NO                    |
| 878    | 0            | 27MAR15    | 475                | N                 | N                      | N                | N                     | 18         | 1     | 105.0           |                |             |               | NO                    |
| 879    | 0            | 27MAR15    | 471                | N                 | Y                      | N                | N                     |            |       |                 |                |             |               | YES                   |
| 88     | 0            | 06MAR15    | 479                | N                 | N                      | N                | N                     | 18         | 1     | 106.8           | 20             | BRD         |               | NO                    |
| 880    | 0            | 27MAR15    | 547                | N                 | N                      | N                | N                     |            |       |                 |                |             |               | YES                   |
| 881    | 0            | 27MAR15    | 510                | N                 | N                      | N                | N                     |            |       |                 |                |             |               | YES                   |
| 882    | 0            | 27MAR15    | 509                | N                 | N                      | N                | N                     |            |       |                 |                |             |               | YES                   |
| 883    | 0            | 27MAR15    | 481                | N                 | N                      | N                | N                     |            |       |                 |                |             |               | YES                   |
| 884    | 0            | 27MAR15    | 501                | N                 | N                      | N                | N                     |            |       |                 |                |             |               | YES                   |
| 885    | 0            | 27MAR15    | 524                | N                 | N                      | N                | N                     |            |       |                 |                |             |               | YES                   |
| 886    | 0            | 27MAR15    | 578                | N                 | N                      | N                | N                     |            |       |                 |                |             |               | YES                   |
| 887    | 0            | 27MAR15    | 534                | N                 | N                      | N                | N                     |            |       |                 |                |             |               | YES                   |
| 888    | 0            | 27MAR15    | 483                | N                 | N                      | N                | N                     | 12         | 1     | 104.0           | 19             | BRD         |               | NO                    |
| 889    | 0            | 27MAR15    | 560                | N                 | N                      | N                | N                     |            |       |                 |                |             |               | YES                   |
| 89     | 0            | 06MAR15    | 479                | N                 | N                      | N                | Y                     | 7          | 2     | 102.4           |                |             |               | NO                    |
| 890    | 0            | 27MAR15    | 527                | N                 | N                      | N                | N                     |            |       |                 |                |             |               | YES                   |
| 891    | 0            | 27MAR15    | 594                | N                 | N                      | N                | N                     |            |       |                 |                |             |               | YES                   |
| 892    | 0            | 27MAR15    | 546                | N                 | Y                      | N                | N                     |            |       |                 |                |             |               | YES                   |
| 893    | 0            | 27MAR15    | 554                | N                 | N                      | N                | N                     | 26         | 2     | 104.9           | 33             | BRD         |               | NO                    |
| 894    | 0            | 27MAR15    | 538                | N                 | N                      | N                | N                     | 25         | 1     | 105.3           | 37             | BRD         |               | NO                    |
| 895    | 0            | 27MAR15    | 486                | N                 | N                      | N                | N                     | 40         | 1     | 103.6           |                |             |               | NO                    |
| 896    | 0            | 27MAR15    | 582                | N                 | N                      | N                | N                     | 32         | 1     | 103.7           | 40             | BRD         |               | NO                    |
| 897    | 0            | 27MAR15    | 532                | N                 | N                      | N                | N                     |            |       |                 |                |             |               | YES                   |
| 898    | 0            | 27MAR15    | 519                | N                 | N                      | N                | N                     | 8          | 1     | 103.8           |                |             |               | NO                    |
| 899    | 0            | 27MAR15    | 501                | N                 | N                      | N                | N                     |            |       |                 |                |             |               | YES                   |
| 9      | 0            | 06MAR15    | 526                | N                 | N                      | N                | N                     | 7          | 1     | 104.2           | 17             | BRD         |               | NO                    |
| 90     | 0            | 06MAR15    | 414                | N                 | N                      | N                | N                     | 7          | 1     | 103.5           |                |             |               | NO                    |
| 900    | 0            | 27MAR15    | 576                | N                 | N                      | N                | N                     |            |       |                 |                |             |               | YES                   |
| 901    | 0            | 27MAR15    | 548                | N                 | N                      | N                | N                     | 10         | 1     | 104.0           |                |             |               | NO                    |

DATA HAVE NOT BEEN VERIFIED

[1] Did not qualify for BRD re-treatment, not a BRD mortality and not removed for non-BRD reasons

PHASE IV ALL SPECIES STUDY BOVINE  
 STUDY: A131R-US-13-231  
 TREATMENT SUCCESS RATE  
 SUMMARY BY ANIMAL

treatment=T01 test material=DRAXXIN period=Arrival

| animal | day of study | day 0 date | day 0 weight (LBS) | histophilus somni | mannheimia haemolytica | mycoplasma bovis | pasteurella multocida | day of BRD | score | temperature (F) | day of removal | brd related | BRD mortality | treatment success [1] |
|--------|--------------|------------|--------------------|-------------------|------------------------|------------------|-----------------------|------------|-------|-----------------|----------------|-------------|---------------|-----------------------|
| 902    | 0            | 27MAR15    | 571                | N                 | N                      | N                | N                     |            |       |                 |                |             |               | YES                   |
| 903    | 0            | 27MAR15    | 545                | N                 | N                      | N                | N                     |            |       |                 |                |             |               | YES                   |
| 904    | 0            | 27MAR15    | 528                | N                 | N                      | N                | N                     | 11         | 2     | 105.5           | 17             | BRD         |               | NO                    |
| 905    | 0            | 27MAR15    | 534                | N                 | N                      | N                | N                     |            |       |                 |                |             |               | YES                   |
| 906    | 0            | 27MAR15    | 511                | N                 | N                      | N                | N                     |            |       |                 |                |             |               | YES                   |
| 907    | 0            | 27MAR15    | 575                | N                 | N                      | N                | N                     | 33         | 1     | 106.2           |                |             |               | NO                    |
| 908    | 0            | 27MAR15    | 565                | N                 | N                      | N                | N                     |            |       |                 |                |             |               | YES                   |
| 909    | 0            | 27MAR15    | 531                | N                 | N                      | N                | N                     |            |       |                 |                |             |               | YES                   |
| 91     | 0            | 06MAR15    | 437                | N                 | N                      | N                | N                     |            |       |                 |                |             |               | YES                   |
| 910    | 0            | 27MAR15    | 498                | N                 | Y                      | N                | N                     |            |       |                 |                |             |               | YES                   |
| 911    | 0            | 27MAR15    | 540                | N                 | N                      | N                | N                     |            |       |                 |                |             |               | YES                   |
| 912    | 0            | 27MAR15    | 506                | N                 | Y                      | N                | N                     | 10         | 1     | 104.3           | 18             | BRD         |               | NO                    |
| 913    | 0            | 27MAR15    | 458                | N                 | N                      | N                | N                     | 7          | 1     | 105.4           |                |             |               | NO                    |
| 914    | 0            | 27MAR15    | 540                | N                 | N                      | N                | N                     |            |       |                 |                |             |               | YES                   |
| 915    | 0            | 27MAR15    | 441                | N                 | N                      | N                | N                     | 20         | 1     | 106.4           | 37             | BRD         |               | NO                    |
| 916    | 0            | 27MAR15    | 500                | N                 | N                      | N                | N                     |            |       |                 |                |             |               | YES                   |
| 917    | 0            | 27MAR15    | 525                | N                 | N                      | N                | Y                     | 27         | 1     | 103.5           |                |             |               | NO                    |
| 918    | 0            | 27MAR15    | 558                | N                 | N                      | N                | N                     | 12         | 1     | 104.3           | 21             | BRD         |               | NO                    |
| 919    | 0            | 27MAR15    | 528                | N                 | N                      | N                | N                     |            |       |                 |                |             |               | YES                   |
| 92     | 0            | 06MAR15    | 440                | N                 | N                      | N                | N                     |            |       |                 |                |             |               | YES                   |
| 920    | 0            | 27MAR15    | 587                | N                 | N                      | N                | N                     |            |       |                 |                |             |               | YES                   |
| 921    | 0            | 27MAR15    | 439                | N                 | N                      | N                | N                     |            |       |                 |                |             |               | YES                   |
| 922    | 0            | 27MAR15    | 477                | N                 | N                      | N                | N                     | 12         | 2     | 103.8           | 14             | BRD         |               | NO                    |
| 923    | 0            | 27MAR15    | 502                | N                 | N                      | N                | N                     |            |       |                 |                |             |               | YES                   |
| 924    | 0            | 27MAR15    | 514                | N                 | N                      | N                | N                     |            |       |                 |                |             |               | YES                   |
| 925    | 0            | 27MAR15    | 495                | N                 | N                      | N                | N                     |            |       |                 |                |             |               | YES                   |
| 926    | 0            | 27MAR15    | 428                | N                 | N                      | N                | N                     |            |       |                 |                |             |               | YES                   |
| 927    | 0            | 27MAR15    | 560                | N                 | N                      | N                | N                     |            |       |                 |                |             |               | YES                   |
| 928    | 0            | 27MAR15    | 613                | N                 | N                      | N                | N                     |            |       |                 |                |             |               | YES                   |
| 929    | 0            | 27MAR15    | 559                | N                 | N                      | N                | N                     |            |       |                 |                |             |               | YES                   |
| 93     | 0            | 06MAR15    | 517                | N                 | N                      | N                | N                     |            |       |                 |                |             |               | YES                   |
| 930    | 0            | 27MAR15    | 590                | N                 | N                      | N                | N                     |            |       |                 |                |             |               | YES                   |
| 931    | 0            | 27MAR15    | 510                | N                 | N                      | N                | N                     | 29         | 1     | 106.5           |                |             |               | NO                    |
| 932    | 0            | 27MAR15    | 540                | N                 | N                      | N                | N                     | 9          | 1     | 103.7           | 23             | BRD         |               | NO                    |

DATA HAVE NOT BEEN VERIFIED

[1] Did not qualify for BRD re-treatment, not a BRD mortality and not removed for non-BRD reasons

PHASE IV ALL SPECIES STUDY BOVINE  
 STUDY: A131R-US-13-231  
 TREATMENT SUCCESS RATE  
 SUMMARY BY ANIMAL

treatment=T01 test material=DRAXXIN period=Arrival

| animal | day of study | day 0 date | day 0 weight (LBS) | histophilus somni | mannheimia haemolytica | mycoplasma bovis | pasteurella multocida | day of BRD | score | temperature (F) | day of removal | brd related | BRD mortality | treatment success [1] |
|--------|--------------|------------|--------------------|-------------------|------------------------|------------------|-----------------------|------------|-------|-----------------|----------------|-------------|---------------|-----------------------|
| 933    | 0            | 27MAR15    | 540                | N                 | N                      | N                | N                     |            |       |                 |                |             |               | YES                   |
| 934    | 0            | 27MAR15    | 518                | N                 | N                      | N                | N                     | 11         | 1     | 106.7           |                |             |               | NO                    |
| 935    | 0            | 27MAR15    | 576                | N                 | N                      | N                | N                     |            |       |                 |                |             |               | YES                   |
| 936    | 0            | 27MAR15    | 482                | N                 | N                      | N                | N                     |            |       |                 |                |             |               | YES                   |
| 937    | 0            | 27MAR15    | 546                | N                 | N                      | N                | N                     |            |       |                 |                |             |               | YES                   |
| 938    | 0            | 27MAR15    | 506                | N                 | N                      | N                | N                     |            |       |                 |                |             |               | YES                   |
| 939    | 0            | 27MAR15    | 462                | N                 | N                      | N                | N                     |            |       |                 |                |             |               | YES                   |
| 94     | 0            | 06MAR15    | 452                | N                 | N                      | N                | Y                     |            |       |                 |                |             |               | YES                   |
| 940    | 0            | 27MAR15    | 507                | N                 | N                      | N                | N                     |            |       |                 |                |             |               | YES                   |
| 941    | 0            | 27MAR15    | 550                | N                 | N                      | N                | N                     |            |       |                 |                |             |               | YES                   |
| 942    | 0            | 28MAR15    | 449                | N                 | N                      | N                | N                     | 11         | 1     | 105.7           | 13             | BRD         |               | NO                    |
| 943    | 0            | 28MAR15    | 465                | N                 | N                      | N                | N                     |            |       |                 |                |             |               | YES                   |
| 944    | 0            | 28MAR15    | 440                | N                 | N                      | N                | N                     | 11         | 1     | 104.5           |                |             |               | NO                    |
| 945    | 0            | 28MAR15    | 470                | N                 | N                      | N                | N                     | 13         | 2     | 106.6           |                |             |               | NO                    |
| 946    | 0            | 28MAR15    | 539                | N                 | N                      | N                | N                     | 39         | 1     | 103.5           |                |             |               | NO                    |
| 947    | 0            | 28MAR15    | 477                | N                 | Y                      | N                | N                     | 11         | 1     | 104.7           | 13             | BRD         |               | NO                    |
| 948    | 0            | 28MAR15    | 551                | N                 | N                      | N                | N                     |            |       |                 |                |             |               | YES                   |
| 949    | 0            | 28MAR15    | 433                | N                 | N                      | N                | N                     | 11         | 1     | 105.1           | 20             | BRD         |               | NO                    |
| 95     | 0            | 13MAR15    | 475                | N                 | N                      | N                | N                     |            |       |                 |                |             |               | YES                   |
| 950    | 0            | 28MAR15    | 454                | N                 | N                      | N                | N                     | 12         | 2     | 107.7           | 19             | BRD         |               | NO                    |
| 951    | 0            | 28MAR15    | 448                | N                 | N                      | N                | N                     | 11         | 1     | 104.3           | 21             | BRD         |               | NO                    |
| 952    | 0            | 28MAR15    | 462                | N                 | Y                      | N                | N                     |            |       |                 |                |             |               | YES                   |
| 953    | 0            | 28MAR15    | 488                | N                 | N                      | N                | N                     | 7          | 1     | 106.6           | 18             | BRD         |               | NO                    |
| 954    | 0            | 28MAR15    | 511                | N                 | N                      | N                | N                     |            |       |                 |                |             |               | YES                   |
| 955    | 0            | 28MAR15    | 472                | N                 | N                      | N                | N                     |            |       |                 |                |             |               | YES                   |
| 956    | 0            | 28MAR15    | 509                | N                 | N                      | N                | N                     | 12         | 1     | 107.2           | 15             | BRD         |               | NO                    |
| 957    | 0            | 28MAR15    | 447                | N                 | N                      | N                | N                     |            |       |                 |                |             |               | YES                   |
| 958    | 0            | 28MAR15    | 456                | N                 | N                      | N                | N                     | 10         | 1     | 105.6           | 19             | BRD         |               | NO                    |
| 959    | 0            | 28MAR15    | 465                | N                 | N                      | N                | N                     |            |       |                 |                |             |               | YES                   |
| 96     | 0            | 13MAR15    | 542                | N                 | N                      | N                | N                     |            |       |                 |                |             |               | YES                   |
| 960    | 0            | 28MAR15    | 511                | N                 | N                      | N                | N                     |            |       |                 |                |             |               | YES                   |
| 961    | 0            | 28MAR15    | 418                | N                 | N                      | N                | Y                     |            |       |                 |                |             |               | YES                   |
| 962    | 0            | 28MAR15    | 446                | N                 | N                      | N                | N                     | 17         | 1     | 106.3           |                |             |               | NO                    |
| 963    | 0            | 28MAR15    | 445                | N                 | N                      | N                | N                     |            |       |                 |                |             |               | YES                   |

DATA HAVE NOT BEEN VERIFIED

[1] Did not qualify for BRD re-treatment, not a BRD mortality and not removed for non-BRD reasons

PHASE IV ALL SPECIES STUDY BOVINE  
 STUDY: A131R-US-13-231  
 TREATMENT SUCCESS RATE  
 SUMMARY BY ANIMAL

treatment=T01 test material=DRAXXIN period=Arrival

| animal | day of study | day 0 date | day 0 weight (LBS) | histophilus somni | mannheimia haemolytica | mycoplasma bovis | pasteurella multocida | day of BRD | score | temperature (F) | day of removal | brd related | BRD mortality | treatment success [1] |
|--------|--------------|------------|--------------------|-------------------|------------------------|------------------|-----------------------|------------|-------|-----------------|----------------|-------------|---------------|-----------------------|
| 964    | 0            | 28MAR15    | 438                | N                 | N                      | N                | N                     | 31         | 1     | 104.0           |                |             |               | NO                    |
| 965    | 0            | 28MAR15    | 487                | N                 | N                      | N                | N                     |            |       |                 |                |             |               | YES                   |
| 966    | 0            | 28MAR15    | 448                | N                 | N                      | N                | N                     |            |       |                 |                |             |               | YES                   |
| 967    | 0            | 28MAR15    | 460                | N                 | N                      | N                | N                     |            |       |                 |                |             |               | YES                   |
| 968    | 0            | 28MAR15    | 425                | N                 | N                      | N                | N                     |            |       |                 |                |             |               | YES                   |
| 969    | 0            | 28MAR15    | 441                | N                 | N                      | N                | N                     |            |       |                 |                |             |               | YES                   |
| 97     | 0            | 13MAR15    | 515                | N                 | N                      | N                | N                     | 7          | 1     | 103.5           |                |             |               | NO                    |
| 970    | 0            | 28MAR15    | 465                | N                 | N                      | N                | N                     | 37         | 1     | 103.9           |                |             |               | NO                    |
| 971    | 0            | 28MAR15    | 480                | N                 | N                      | N                | N                     |            |       |                 |                |             |               | YES                   |
| 972    | 0            | 28MAR15    | 489                | N                 | N                      | N                | N                     | 17         | 1     | 105.1           | 27             | BRD         |               | NO                    |
| 973    | 0            | 28MAR15    | 417                | N                 | N                      | N                | N                     | 14         | 1     | 105.6           | 21             | BRD         |               | NO                    |
| 974    | 0            | 28MAR15    | 467                | N                 | N                      | N                | N                     |            |       |                 |                |             |               | YES                   |
| 975    | 0            | 28MAR15    | 507                | N                 | N                      | N                | N                     | 9          | 1     | 103.7           | 16             | BRD         |               | NO                    |
| 976    | 0            | 28MAR15    | 587                | N                 | N                      | N                | N                     |            |       |                 |                |             |               | YES                   |
| 977    | 0            | 28MAR15    | 430                | N                 | N                      | N                | N                     |            |       |                 |                |             |               | YES                   |
| 978    | 0            | 28MAR15    | 519                | N                 | N                      | N                | N                     |            |       |                 |                |             |               | YES                   |
| 979    | 0            | 28MAR15    | 429                | N                 | Y                      | N                | N                     |            |       |                 |                |             |               | YES                   |
| 98     | 0            | 13MAR15    | 533                | N                 | N                      | N                | N                     | 10         | 1     | 104.4           | 17             | BRD         |               | NO                    |
| 980    | 0            | 28MAR15    | 522                | N                 | N                      | N                | N                     |            |       |                 |                |             |               | YES                   |
| 981    | 0            | 28MAR15    | 424                | N                 | N                      | N                | N                     |            |       |                 |                |             |               | YES                   |
| 982    | 0            | 28MAR15    | 513                | N                 | N                      | N                | N                     | 8          | 1     | 104.5           | 12             | BRD         |               | NO                    |
| 983    | 0            | 28MAR15    | 475                | N                 | N                      | N                | N                     | 16         | 1     | 105.1           |                |             |               | NO                    |
| 984    | 0            | 28MAR15    | 463                | N                 | N                      | N                | N                     |            |       |                 |                |             |               | YES                   |
| 985    | 0            | 28MAR15    | 520                | N                 | N                      | N                | N                     |            |       |                 |                |             |               | YES                   |
| 986    | 0            | 28MAR15    | 530                | N                 | N                      | N                | N                     |            |       |                 |                |             |               | YES                   |
| 987    | 0            | 28MAR15    | 431                | N                 | N                      | N                | N                     | 21         | 1     | 105.1           |                |             |               | NO                    |
| 988    | 0            | 28MAR15    | 561                | N                 | N                      | N                | N                     |            |       |                 |                |             |               | YES                   |
| 989    | 0            | 28MAR15    | 382                | N                 | N                      | N                | N                     | 8          | 1     | 107.2           | 13             | BRD         |               | NO                    |
| 99     | 0            | 13MAR15    | 482                | N                 | N                      | N                | N                     |            |       |                 |                |             |               | YES                   |
| 990    | 0            | 28MAR15    | 516                | N                 | Y                      | N                | N                     | 16         | 1     | 106.9           | 18             | BRD         |               | NO                    |
| 991    | 0            | 28MAR15    | 464                | N                 | N                      | N                | N                     |            |       |                 |                |             |               | YES                   |
| 992    | 0            | 28MAR15    | 471                | N                 | N                      | N                | N                     |            |       |                 |                |             |               | YES                   |
| 993    | 0            | 28MAR15    | 593                | N                 | N                      | N                | Y                     | 7          | 1     | 104.4           |                |             |               | NO                    |
| 994    | 0            | 28MAR15    | 454                | N                 | N                      | N                | N                     |            |       |                 |                |             |               | YES                   |

DATA HAVE NOT BEEN VERIFIED

[1] Did not qualify for BRD re-treatment, not a BRD mortality and not removed for non-BRD reasons

PHASE IV ALL SPECIES STUDY BOVINE  
 STUDY: A131R-US-13-231  
 TREATMENT SUCCESS RATE  
 SUMMARY BY ANIMAL

treatment=T01 test material=DRAXXIN period=Arrival

| animal | day of study | day 0 date | day 0 weight (LBS) | histophilus somni | mannheimia haemolytica | mycoplasma bovis | pasteurella multocida | day of BRD | score | temperature (F) | day of removal | brd related | BRD mortality | treatment success [1] |
|--------|--------------|------------|--------------------|-------------------|------------------------|------------------|-----------------------|------------|-------|-----------------|----------------|-------------|---------------|-----------------------|
| 995    | 0            | 28MAR15    | 536                | N                 | N                      | N                | N                     |            |       |                 |                |             |               | YES                   |
| 996    | 0            | 28MAR15    | 536                | N                 | N                      | N                | N                     | 10         | 1     | 103.6           |                |             |               | NO                    |
| 997    | 0            | 28MAR15    | 494                | N                 | N                      | N                | N                     |            |       |                 |                |             |               | YES                   |
| 998    | 0            | 28MAR15    | 417                | N                 | N                      | N                | N                     |            |       |                 |                |             |               | YES                   |
| 999    | 0            | 28MAR15    | 484                | N                 | N                      | N                | N                     | 12         | 1     | 106.3           | 19             | BRD         |               | NO                    |

DATA HAVE NOT BEEN VERIFIED

[1] Did not qualify for BRD re-treatment, not a BRD mortality and not removed for non-BRD reasons



**PHASE IV ALL SPECIES STUDY BOVINE**  
**STUDY: A131R-US-13-231**  
**TREATMENT SUCCESS RATE**  
**SUMMARY BY ANIMAL**

treatment=T01 test material=DRAXXIN period=First Pull

| animal | day of study | day 0 date | day 0 weight (LBS) | histophilus sommi | mannheimia haemolytica | mycoplasma bovis | pasteurella multocida | Bovine Parainfluenza 3 (qPCR-BPI3) | Bovine Respiratory Syncytial Virus (qPCR-BRSV-PCR) | Bovine Viral Diarrhea (qPCR-BVD-PCR) |
|--------|--------------|------------|--------------------|-------------------|------------------------|------------------|-----------------------|------------------------------------|----------------------------------------------------|--------------------------------------|
| 100    | 9            | 13MAR15    | 508                | N                 | N                      | N                | N                     | Positive                           | Positive                                           | Positive                             |
| 1004   | 19           | 28MAR15    | 540                | N                 | Y                      | P                | N                     | Negative                           | Negative                                           | Negative                             |
| 1006   | 12           | 28MAR15    | 450                | N                 | Y                      | N                | N                     | Negative                           | Positive                                           | Negative                             |
| 1009   | 25           | 28MAR15    | 471                | N                 | N                      | P                | N                     | Positive                           | Negative                                           | Negative                             |
| 101    | 10           | 13MAR15    | 556                | N                 | Y                      | N                | N                     | Positive                           | Positive                                           | Positive                             |
| 1011   | 24           | 28MAR15    | 487                | N                 | Y                      | P                | N                     | Negative                           | Negative                                           | Negative                             |
| 1016   | 37           | 28MAR15    | 468                | N                 | Y                      |                  | Y                     | Negative                           | Positive                                           | Negative                             |
| 102    | 7            | 13MAR15    | 473                | N                 | N                      | Y                | N                     | Positive                           | Positive                                           | Positive                             |
| 1030   | 11           | 28MAR15    | 533                | N                 | Y                      | N                | N                     | Positive                           | Positive                                           | Positive                             |
| 1032   | 14           | 28MAR15    | 470                | N                 | Y                      | N                | N                     | Negative                           | Positive                                           | Negative                             |
| 1033   | 16           | 28MAR15    | 487                | N                 | Y                      | N                | N                     | Negative                           | Negative                                           | Negative                             |
| 1034   | 37           | 28MAR15    | 497                | N                 | N                      |                  | N                     | Negative                           | Positive                                           | Negative                             |
| 1035   | 11           | 28MAR15    | 456                | N                 | N                      | N                | N                     | Positive                           | Positive                                           | Negative                             |
| 1036   | 8            | 28MAR15    | 439                | N                 | N                      | N                | N                     | Negative                           | Negative                                           | Positive                             |
| 1037   | 11           | 28MAR15    | 437                | N                 | N                      | N                | N                     | Positive                           | Negative                                           | Negative                             |
| 104    | 12           | 13MAR15    | 548                | N                 | Y                      | Y                | N                     | Negative                           | Negative                                           | Negative                             |
| 105    | 7            | 13MAR15    | 523                | N                 | N                      | N                | N                     | Positive                           | Positive                                           | Positive                             |
| 108    | 8            | 13MAR15    | 453                | N                 | N                      | Y                | N                     | Positive                           | Positive                                           | Negative                             |
| 11     | 10           | 06MAR15    | 438                | N                 | N                      | N                | N                     | Negative                           | Positive                                           | Negative                             |
| 110    | 9            | 13MAR15    | 456                | N                 | N                      | N                | N                     | Positive                           | Positive                                           | Positive                             |
| 112    | 11           | 13MAR15    | 551                | N                 | N                      | Y                | Y                     | Positive                           | Negative                                           | Positive                             |
| 113    | 12           | 13MAR15    | 543                | N                 | N                      | N                | N                     | Positive                           | Negative                                           | Positive                             |
| 114    | 14           | 13MAR15    | 559                | N                 | N                      | N                | N                     | Negative                           | Positive                                           | Negative                             |
| 115    | 7            | 13MAR15    | 493                | N                 | N                      | N                | N                     | Positive                           | Positive                                           | Positive                             |
| 117    | 12           | 13MAR15    | 447                | N                 | N                      | Y                | N                     | Negative                           | Negative                                           | Positive                             |
| 118    | 7            | 13MAR15    | 570                | N                 | N                      | N                | N                     | Positive                           | Positive                                           | Positive                             |
| 12     | 7            | 06MAR15    | 447                | N                 | N                      | N                | N                     | Positive                           | Negative                                           | Negative                             |
| 120    | 15           | 13MAR15    | 507                | N                 | N                      | N                | N                     | Negative                           | Negative                                           | Negative                             |
| 124    | 28           | 13MAR15    | 536                | N                 | N                      | P                | N                     | Negative                           | Negative                                           | Negative                             |
| 127    | 12           | 13MAR15    | 440                | N                 | N                      | Y                | N                     | Positive                           | Positive                                           | Positive                             |
| 128    | 14           | 13MAR15    | 510                | N                 | N                      | Y                | N                     | Negative                           | Negative                                           | Negative                             |
| 130    | 11           | 13MAR15    | 590                | N                 | Y                      | Y                | N                     | Positive                           | Negative                                           | Positive                             |

**DATA HAVE NOT BEEN VERIFIED**

**[1] Did not qualify for BRD re-treatment, not a BRD mortality and not removed for non-BRD reasons**

PHASE IV ALL SPECIES STUDY BOVINE  
 STUDY: A131R-US-13-231  
 TREATMENT SUCCESS RATE  
 SUMMARY BY ANIMAL

treatment=T01 test material=DRAXXIN period=First Pull

| animal | Infectious<br>Bovine<br>Rhinotracheitis<br>(qPCR-IBR-BHV) | day<br>of<br>BRD | score | temperature<br>(F) | day of<br>removal | brd<br>related | BRD<br>mortality | treatment<br>success<br>[1] |
|--------|-----------------------------------------------------------|------------------|-------|--------------------|-------------------|----------------|------------------|-----------------------------|
| 100    | Negative                                                  |                  |       |                    | 13                | BRD            |                  | NO                          |
| 1004   | Negative                                                  |                  |       |                    |                   |                |                  | YES                         |
| 1006   | Negative                                                  |                  |       |                    |                   |                |                  | YES                         |
| 1009   | Negative                                                  |                  |       |                    | 28                | BRD            |                  | NO                          |
| 101    | Positive                                                  | 18               | 1     | 103.5              | 18                | BRD            |                  | NO                          |
| 1011   | Negative                                                  |                  |       |                    |                   |                |                  | YES                         |
| 1016   | Negative                                                  | 40               | 3     | 102.4              | 40                | BRD            |                  | NO                          |
| 102    | Negative                                                  |                  |       |                    |                   |                |                  | YES                         |
| 1030   | Negative                                                  | 19               | 1     | 105.5              | 19                | BRD            |                  | NO                          |
| 1032   | Negative                                                  |                  |       |                    |                   |                |                  | YES                         |
| 1033   | Negative                                                  |                  |       |                    |                   |                |                  | YES                         |
| 1034   | Negative                                                  |                  |       |                    |                   |                |                  | YES                         |
| 1035   | Negative                                                  |                  |       |                    | 18                | BRD            |                  | NO                          |
| 1036   | Negative                                                  |                  |       |                    | 14                | BRD            |                  | NO                          |
| 1037   | Negative                                                  |                  |       |                    | 14                | BRD            |                  | NO                          |
| 104    | Negative                                                  |                  |       |                    |                   |                |                  | YES                         |
| 105    | Negative                                                  |                  |       |                    | 15                | BRD            |                  | NO                          |
| 108    | Negative                                                  |                  |       |                    | 35                | BRD            |                  | NO                          |
| 11     | Negative                                                  |                  |       |                    |                   |                |                  | YES                         |
| 110    | Positive                                                  |                  |       |                    | 17                | BRD            |                  | NO                          |
| 112    | Negative                                                  |                  |       |                    |                   |                |                  | YES                         |
| 113    | Negative                                                  |                  |       |                    | 19                | BRD            |                  | NO                          |
| 114    | Negative                                                  |                  |       |                    |                   |                |                  | YES                         |
| 115    | Negative                                                  |                  |       |                    | 13                | BRD            |                  | NO                          |
| 117    | Negative                                                  |                  |       |                    |                   |                |                  | YES                         |
| 118    | Negative                                                  |                  |       |                    |                   |                |                  | YES                         |
| 12     | Negative                                                  |                  |       |                    |                   |                |                  | YES                         |
| 120    | Negative                                                  |                  |       |                    |                   |                |                  | YES                         |
| 124    | Negative                                                  |                  |       |                    |                   |                |                  | YES                         |
| 127    | Positive                                                  |                  |       |                    | 39                | BRD            |                  | NO                          |
| 128    | Negative                                                  |                  |       |                    | 23                | BRD            |                  | NO                          |
| 130    | Negative                                                  | 13               | 3     | 105.9              | 13                | BRD            |                  | NO                          |

DATA HAVE NOT BEEN VERIFIED

[1] Did not qualify for BRD re-treatment, not a BRD mortality and not removed for non-BRD reasons

PHASE IV ALL SPECIES STUDY BOVINE  
 STUDY: A131R-US-13-231  
 TREATMENT SUCCESS RATE  
 SUMMARY BY ANIMAL

treatment=T01 test material=DRAXXIN period=First Pull

| animal | day of study | day 0 date | day 0 weight (LBS) | histophilus sommi | mannheimia haemolytica | mycoplasma bovis | pasteurella multocida | Bovine Parainfluenza 3 (qPCR-BPI3) | Bovine Respiratory Syncytial Virus (qPCR-BRSV-PCR) | Bovine Viral Diarrhea (qPCR-BVD-PCR) |
|--------|--------------|------------|--------------------|-------------------|------------------------|------------------|-----------------------|------------------------------------|----------------------------------------------------|--------------------------------------|
| 132    | 14           | 13MAR15    | 533                | N                 | N                      | N                | N                     | Positive                           | Negative                                           | Positive                             |
| 133    | 11           | 13MAR15    | 532                | N                 | Y                      | Y                | N                     | Positive                           | Positive                                           | Positive                             |
| 137    | 12           | 13MAR15    | 540                | N                 | N                      | Y                | N                     | Positive                           | Positive                                           | Positive                             |
| 139    | 12           | 13MAR15    | 498                | N                 | N                      | N                | N                     | Positive                           | Positive                                           | Positive                             |
| 140    | 12           | 13MAR15    | 476                | N                 | N                      | Y                | N                     | Positive                           | Negative                                           | Negative                             |
| 141    | 11           | 13MAR15    | 539                | N                 | Y                      | Y                | N                     | Positive                           | Negative                                           | Positive                             |
| 142    | 12           | 13MAR15    | 462                | N                 | Y                      | Y                | N                     | Negative                           | Negative                                           | Positive                             |
| 144    | 10           | 13MAR15    | 514                | N                 | N                      | Y                | N                     | Positive                           | Positive                                           | Positive                             |
| 146    | 13           | 13MAR15    | 467                | N                 | N                      | N                | N                     | Positive                           | Negative                                           | Negative                             |
| 147    | 17           | 13MAR15    | 502                | N                 | N                      | Y                | N                     | Negative                           | Negative                                           | Negative                             |
| 148    | 7            | 13MAR15    | 563                | N                 | N                      | N                | N                     | Positive                           | Positive                                           | Negative                             |
| 149    | 12           | 13MAR15    | 510                | N                 | N                      | N                | N                     | Negative                           | Negative                                           | Positive                             |
| 151    | 7            | 13MAR15    | 550                | N                 | N                      | Y                | N                     | Positive                           | Positive                                           | Positive                             |
| 156    | 8            | 13MAR15    | 431                | N                 | N                      | N                | N                     | Positive                           | Positive                                           | Positive                             |
| 159    | 11           | 13MAR15    | 541                | Y                 | Y                      | Y                | N                     | Negative                           | Positive                                           | Positive                             |
| 160    | 7            | 13MAR15    | 549                | Y                 | N                      | Y                | N                     | Positive                           | Positive                                           | Positive                             |
| 163    | 11           | 13MAR15    | 499                | N                 | Y                      | Y                | N                     | Positive                           | Positive                                           | Positive                             |
| 164    | 12           | 13MAR15    | 429                | N                 | N                      | N                | Y                     | Positive                           | Positive                                           | Negative                             |
| 165    | 8            | 13MAR15    | 501                | N                 | N                      | N                | N                     | Positive                           | Positive                                           | Positive                             |
| 166    | 8            | 13MAR15    | 568                | N                 | N                      | N                | N                     | Positive                           | Positive                                           | Positive                             |
| 167    | 18           | 13MAR15    | 569                | N                 | Y                      | Y                | N                     | Negative                           | Positive                                           | Negative                             |
| 169    | 13           | 13MAR15    | 548                | N                 | N                      | Y                | N                     | Negative                           | Negative                                           | Positive                             |
| 17     | 14           | 06MAR15    | 486                | N                 | N                      | Y                | N                     | Positive                           | Positive                                           | Positive                             |
| 171    | 10           | 13MAR15    | 524                | N                 | N                      | Y                | N                     | Positive                           | Positive                                           | Negative                             |
| 172    | 9            | 13MAR15    | 448                | N                 | N                      | N                | N                     | Positive                           | Positive                                           | Positive                             |
| 174    | 12           | 13MAR15    | 436                | N                 | N                      | Y                | N                     | Positive                           | Negative                                           | Negative                             |
| 175    | 8            | 13MAR15    | 546                | N                 | N                      | N                | N                     | Positive                           | Positive                                           | Positive                             |
| 177    | 8            | 13MAR15    | 507                | N                 | N                      | Y                | N                     | Positive                           | Positive                                           | Positive                             |
| 179    | 17           | 13MAR15    | 542                | N                 | Y                      | Y                | N                     | Negative                           | Negative                                           | Negative                             |
| 181    | 17           | 13MAR15    | 478                | N                 | Y                      | Y                | N                     | Negative                           | Negative                                           | Negative                             |
| 184    | 7            | 13MAR15    | 517                | N                 | Y                      | Y                | N                     | Positive                           | Positive                                           | Negative                             |
| 187    | 7            | 13MAR15    | 471                | N                 | N                      | N                | N                     | Positive                           | Positive                                           | Positive                             |

DATA HAVE NOT BEEN VERIFIED

[1] Did not qualify for BRD re-treatment, not a BRD mortality and not removed for non-BRD reasons

PHASE IV ALL SPECIES STUDY BOVINE  
 STUDY: A131R-US-13-231  
 TREATMENT SUCCESS RATE  
 SUMMARY BY ANIMAL

treatment=T01 test material=DRAXXIN period=First Pull

| animal | Infectious<br>Bovine<br>Rhinotracheitis<br>(qPCR-IBR-BHV) | day<br>of<br>BRD | score | temperature<br>(F) | day of<br>removal | brd<br>related | BRD<br>mortality | treatment<br>success<br>[1] |
|--------|-----------------------------------------------------------|------------------|-------|--------------------|-------------------|----------------|------------------|-----------------------------|
| 132    | Negative                                                  |                  |       |                    | 34                | BRD            |                  | NO                          |
| 133    | Positive                                                  |                  |       |                    |                   |                |                  | YES                         |
| 137    | Negative                                                  |                  |       |                    | 26                | BRD            |                  | NO                          |
| 139    | Negative                                                  |                  |       |                    | 17                | BRD            |                  | NO                          |
| 140    | Negative                                                  |                  |       |                    | 28                | BRD            |                  | NO                          |
| 141    | Negative                                                  | 40               | 1     | 106.0              | 40                | BRD            |                  | NO                          |
| 142    | Negative                                                  |                  |       |                    |                   |                |                  | YES                         |
| 144    | Negative                                                  |                  |       |                    |                   |                |                  | YES                         |
| 146    | Negative                                                  |                  |       |                    |                   |                |                  | YES                         |
| 147    | Negative                                                  |                  |       |                    |                   |                |                  | YES                         |
| 148    | Negative                                                  |                  |       |                    | 16                | BRD            |                  | NO                          |
| 149    | Negative                                                  |                  |       |                    |                   |                |                  | YES                         |
| 151    | Negative                                                  |                  |       |                    |                   |                |                  | YES                         |
| 156    | Negative                                                  |                  |       |                    |                   |                |                  | YES                         |
| 159    | Positive                                                  | 36               | 2     | 105.1              | 36                | BRD            |                  | NO                          |
| 160    | Negative                                                  |                  |       |                    | 14                | BRD            |                  | NO                          |
| 163    | Negative                                                  | 18               | 2     | 106.2              | 18                | BRD            |                  | NO                          |
| 164    | Negative                                                  | 19               | 2     |                    | 20                | BRD            |                  | NO                          |
| 165    | Positive                                                  |                  |       |                    | 17                | BRD            |                  | NO                          |
| 166    | Negative                                                  |                  |       |                    | 16                | BRD            |                  | NO                          |
| 167    | Negative                                                  |                  |       |                    |                   |                |                  | YES                         |
| 169    | Negative                                                  |                  |       |                    |                   |                |                  | YES                         |
| 17     | Negative                                                  |                  |       |                    |                   |                |                  | YES                         |
| 171    | Negative                                                  |                  |       |                    | 16                | BRD            |                  | NO                          |
| 172    | Negative                                                  |                  |       |                    | 18                | BRD            |                  | NO                          |
| 174    | Negative                                                  |                  |       |                    |                   |                |                  | YES                         |
| 175    | Positive                                                  |                  |       |                    | 11                | BRD            |                  | NO                          |
| 177    | Positive                                                  |                  |       |                    | 30                | BRD            |                  | NO                          |
| 179    | Negative                                                  | 35               | 1     | 103.5              | 35                | BRD            |                  | NO                          |
| 181    | Negative                                                  |                  |       |                    |                   |                |                  | YES                         |
| 184    | Negative                                                  | 13               | 3     | 107.3              | 13                | BRD            |                  | NO                          |
| 187    | Positive                                                  |                  |       |                    |                   |                |                  | YES                         |

DATA HAVE NOT BEEN VERIFIED

[1] Did not qualify for BRD re-treatment, not a BRD mortality and not removed for non-BRD reasons

PHASE IV ALL SPECIES STUDY BOVINE  
 STUDY: A131R-US-13-231  
 TREATMENT SUCCESS RATE  
 SUMMARY BY ANIMAL

treatment=T01 test material=DRAXXIN period=First Pull

| animal | day of study | day 0 date | day 0 weight (LBS) | histophilus sommi | mannheimia haemolytica | mycoplasma bovis | pasteurella multocida | Bovine Parainfluenza 3 (qPCR-BPI3) | Bovine Respiratory Syncytial Virus (qPCR-BRSV-PCR) | Bovine Viral Diarrhea (qPCR-BVD-PCR) |
|--------|--------------|------------|--------------------|-------------------|------------------------|------------------|-----------------------|------------------------------------|----------------------------------------------------|--------------------------------------|
| 188    | 34           | 13MAR15    | 540                | N                 | N                      | N                | N                     | Negative                           | Negative                                           | Negative                             |
| 191    | 13           | 13MAR15    | 436                | N                 | N                      | N                | N                     | Negative                           | Negative                                           | Positive                             |
| 192    | 7            | 13MAR15    | 474                | N                 | N                      | N                | N                     | Positive                           | Positive                                           | Positive                             |
| 195    | 14           | 13MAR15    | 546                | N                 | N                      | N                | N                     | Negative                           | Positive                                           | Negative                             |
| 20     | 11           | 06MAR15    | 438                | N                 | N                      | Y                | N                     | Negative                           | Positive                                           | Positive                             |
| 200    | 40           | 13MAR15    | 477                | Y                 | Y                      | N                | Y                     | Negative                           | Negative                                           | Negative                             |
| 201    | 7            | 13MAR15    | 470                | N                 | Y                      | N                | N                     | Positive                           | Positive                                           | Negative                             |
| 202    | 18           | 13MAR15    | 575                | N                 | Y                      | Y                | N                     | Positive                           | Positive                                           | Negative                             |
| 203    | 25           | 13MAR15    | 496                | N                 | N                      | N                | N                     | Negative                           | Positive                                           | Negative                             |
| 209    | 7            | 13MAR15    | 545                | N                 | N                      | N                | N                     | Positive                           | Positive                                           | Negative                             |
| 212    | 13           | 13MAR15    | 483                | N                 | Y                      | Y                | N                     | Negative                           | Negative                                           | Negative                             |
| 213    | 25           | 13MAR15    | 546                | N                 | N                      | N                | N                     | Negative                           | Negative                                           | Negative                             |
| 214    | 11           | 13MAR15    | 475                | N                 | N                      | N                | N                     | Negative                           | Positive                                           | Positive                             |
| 215    | 7            | 13MAR15    | 482                | N                 | N                      | N                | N                     | Positive                           | Positive                                           | Negative                             |
| 217    | 7            | 13MAR15    | 516                | N                 | N                      | P                | N                     | Positive                           | Positive                                           | Negative                             |
| 22     | 13           | 06MAR15    | 466                | N                 | N                      | Y                | N                     | Positive                           | Positive                                           | Positive                             |
| 221    | 19           | 13MAR15    | 486                | N                 | Y                      | N                | N                     | Positive                           | Negative                                           | Negative                             |
| 222    | 8            | 13MAR15    | 490                | N                 | Y                      | Y                | N                     | Positive                           | Positive                                           | Negative                             |
| 227    | 18           | 13MAR15    | 499                | N                 | N                      | Y                | N                     | Negative                           | Positive                                           | Negative                             |
| 232    | 14           | 13MAR15    | 508                | N                 | Y                      | Y                | N                     | Positive                           | Positive                                           | Negative                             |
| 234    | 20           | 13MAR15    | 482                | N                 | N                      | N                | N                     | Negative                           | Positive                                           | Negative                             |
| 238    | 7            | 13MAR15    | 446                | N                 | N                      | N                | N                     | Positive                           | Positive                                           | Negative                             |
| 24     | 7            | 06MAR15    | 562                | N                 | N                      | N                | N                     | Negative                           | Negative                                           | Positive                             |
| 247    | 8            | 13MAR15    | 534                | N                 | N                      | N                | N                     | Positive                           | Positive                                           | Positive                             |
| 248    | 17           | 13MAR15    | 532                | N                 | Y                      | N                | N                     | Negative                           | Positive                                           | Negative                             |
| 250    | 25           | 13MAR15    | 500                | N                 | Y                      | P                | Y                     | Negative                           | Negative                                           | Negative                             |
| 255    | 18           | 13MAR15    | 450                | N                 | Y                      | N                | N                     | Positive                           | Positive                                           | Negative                             |
| 256    | 29           | 13MAR15    | 540                | N                 | N                      | N                | N                     | Negative                           | Negative                                           | Negative                             |
| 258    | 18           | 13MAR15    | 480                | N                 | N                      | Y                | Y                     | Negative                           | Positive                                           | Negative                             |
| 26     | 7            | 06MAR15    | 502                | N                 | N                      | N                | N                     | Negative                           | Negative                                           | Positive                             |
| 262    | 12           | 13MAR15    | 500                | N                 | N                      | N                | N                     | Negative                           | Negative                                           | Positive                             |
| 264    | 21           | 13MAR15    | 533                | Y                 | Y                      | P                | N                     | Negative                           | Negative                                           | Negative                             |

DATA HAVE NOT BEEN VERIFIED

[1] Did not qualify for BRD re-treatment, not a BRD mortality and not removed for non-BRD reasons

PHASE IV ALL SPECIES STUDY BOVINE  
 STUDY: A131R-US-13-231  
 TREATMENT SUCCESS RATE  
 SUMMARY BY ANIMAL

treatment=T01 test material=DRAXXIN period=First Pull

| animal | Infectious<br>Bovine<br>Rhinotracheitis<br>(qPCR-IBR-BHV) | day<br>of<br>BRD | score | temperature<br>(F) | day of<br>removal | brd<br>related | BRD<br>mortality | treatment<br>success<br>[1] |
|--------|-----------------------------------------------------------|------------------|-------|--------------------|-------------------|----------------|------------------|-----------------------------|
| 188    | Negative                                                  |                  |       |                    |                   |                |                  | YES                         |
| 191    | Negative                                                  |                  |       |                    | 21                | BRD            |                  | NO                          |
| 192    | Negative                                                  |                  |       |                    | 10                | BRD            |                  | NO                          |
| 195    | Negative                                                  |                  |       |                    |                   |                |                  | YES                         |
| 20     | Positive                                                  |                  |       |                    | 24                | BRD            |                  | NO                          |
| 200    | Negative                                                  |                  |       |                    |                   |                |                  | YES                         |
| 201    | Negative                                                  |                  |       |                    |                   |                |                  | YES                         |
| 202    | Negative                                                  |                  |       |                    |                   |                |                  | YES                         |
| 203    | Negative                                                  |                  |       |                    | 30                | BRD            |                  | NO                          |
| 209    | Negative                                                  |                  |       |                    | 12                | BRD            |                  | NO                          |
| 212    | Negative                                                  |                  |       |                    |                   |                |                  | YES                         |
| 213    | Negative                                                  |                  |       |                    |                   |                |                  | YES                         |
| 214    | Positive                                                  |                  |       |                    |                   |                |                  | YES                         |
| 215    | Negative                                                  |                  |       |                    | 19                | BRD            |                  | NO                          |
| 217    | Negative                                                  |                  |       |                    |                   |                |                  | YES                         |
| 22     | Negative                                                  |                  |       |                    | 20                | BRD            |                  | NO                          |
| 221    | Negative                                                  |                  |       |                    |                   |                |                  | YES                         |
| 222    | Negative                                                  |                  |       |                    |                   |                |                  | YES                         |
| 227    | Negative                                                  |                  |       |                    |                   |                |                  | YES                         |
| 232    | Negative                                                  | 20               | 3     | 105.0              | 20                | BRD            |                  | NO                          |
| 234    | Positive                                                  |                  |       |                    | 29                | BRD            |                  | NO                          |
| 238    | Negative                                                  |                  |       |                    | 17                | BRD            |                  | NO                          |
| 24     | Negative                                                  |                  |       |                    | 12                | BRD            |                  | NO                          |
| 247    | Positive                                                  |                  |       |                    | 27                | BRD            |                  | NO                          |
| 248    | Negative                                                  |                  |       |                    |                   |                |                  | YES                         |
| 250    | Negative                                                  |                  |       |                    |                   |                |                  | YES                         |
| 255    | Negative                                                  |                  |       |                    |                   |                |                  | YES                         |
| 256    | Negative                                                  |                  |       |                    |                   |                |                  | YES                         |
| 258    | Negative                                                  | 28               | 1     | 103.7              | 28                | BRD            |                  | NO                          |
| 26     | Positive                                                  |                  |       |                    |                   |                |                  | YES                         |
| 262    | Negative                                                  |                  |       |                    | 19                | BRD            |                  | NO                          |
| 264    | Negative                                                  | 28               | 3     | 105.4              | 28                | BRD            |                  | NO                          |

DATA HAVE NOT BEEN VERIFIED

[1] Did not qualify for BRD re-treatment, not a BRD mortality and not removed for non-BRD reasons

PHASE IV ALL SPECIES STUDY BOVINE  
 STUDY: A131R-US-13-231  
 TREATMENT SUCCESS RATE  
 SUMMARY BY ANIMAL

treatment=T01 test material=DRAXXIN period=First Pull

| animal | day of study | day 0 date | day 0 weight (LBS) | histophilus somni | mannheimia haemolytica | mycoplasma bovis | pasteurella multocida | Bovine Parainfluenza 3 (qPCR-BPI3) | Bovine Respiratory Syncytial Virus (qPCR-BRSV-PCR) | Bovine Viral Diarrhea (qPCR-BVD-PCR) |
|--------|--------------|------------|--------------------|-------------------|------------------------|------------------|-----------------------|------------------------------------|----------------------------------------------------|--------------------------------------|
| 265    | 20           | 13MAR15    | 435                | N                 | N                      | N                | Y                     | Positive                           | Negative                                           | Negative                             |
| 266    | 21           | 13MAR15    | 552                | N                 | Y                      | N                | N                     | Negative                           | Negative                                           | Negative                             |
| 268    | 18           | 13MAR15    | 560                | N                 | Y                      | Y                | N                     | Negative                           | Negative                                           | Negative                             |
| 271    | 21           | 13MAR15    | 527                | N                 | Y                      | P                | N                     | Negative                           | Negative                                           | Negative                             |
| 272    | 33           | 13MAR15    | 463                | Y                 | N                      | P                | N                     | Negative                           | Negative                                           | Negative                             |
| 275    | 23           | 13MAR15    | 492                | N                 | N                      | N                | N                     | Negative                           | Negative                                           | Negative                             |
| 277    | 19           | 13MAR15    | 480                | N                 | Y                      | N                | N                     | Negative                           | Positive                                           | Negative                             |
| 278    | 21           | 13MAR15    | 564                | N                 | N                      | N                | N                     | Negative                           | Negative                                           | Negative                             |
| 280    | 17           | 13MAR15    | 591                | N                 | N                      | N                | N                     | Negative                           | Positive                                           | Negative                             |
| 287    | 17           | 13MAR15    | 577                | N                 | N                      | N                | N                     | Positive                           | Positive                                           | Negative                             |
| 288    | 21           | 13MAR15    | 453                | N                 | N                      | P                | N                     | Negative                           | Negative                                           | Negative                             |
| 291    | 13           | 20MAR15    | 480                | N                 | Y                      | P                | N                     | Positive                           | Positive                                           | Positive                             |
| 292    | 12           | 20MAR15    | 441                | N                 | N                      | N                | N                     | Negative                           | Negative                                           | Negative                             |
| 295    | 7            | 20MAR15    | 470                | N                 | N                      | N                | N                     | Positive                           | Negative                                           | Negative                             |
| 3      | 13           | 06MAR15    | 470                | N                 | N                      | Y                | N                     | Positive                           | Positive                                           | Positive                             |
| 30     | 7            | 06MAR15    | 524                | N                 | N                      | N                | N                     | Negative                           | Negative                                           | Positive                             |
| 300    | 19           | 20MAR15    | 455                | N                 | N                      | N                | N                     | Positive                           | Positive                                           | Negative                             |
| 301    | 7            | 20MAR15    | 510                | N                 | N                      | N                | N                     | Negative                           | Positive                                           | Negative                             |
| 302    | 7            | 20MAR15    | 487                | N                 | N                      | N                | N                     | Negative                           | Negative                                           | Negative                             |
| 309    | 7            | 20MAR15    | 444                | N                 | N                      | N                | N                     | Negative                           | Positive                                           | Negative                             |
| 311    | 12           | 20MAR15    | 405                | N                 | Y                      | Y                | N                     | Negative                           | Positive                                           | Negative                             |
| 312    | 18           | 20MAR15    | 484                | N                 | Y                      | N                | N                     | Negative                           | Negative                                           | Negative                             |
| 315    | 25           | 20MAR15    | 425                | N                 | N                      | P                | Y                     | Negative                           | Negative                                           | Negative                             |
| 318    | 25           | 20MAR15    | 455                | N                 | Y                      | P                | Y                     | Negative                           | Negative                                           | Negative                             |
| 319    | 11           | 20MAR15    | 439                | N                 | N                      | N                | N                     | Positive                           | Positive                                           | Negative                             |
| 320    | 14           | 20MAR15    | 459                | N                 | N                      | N                | N                     | Positive                           | Positive                                           | Negative                             |
| 323    | 14           | 20MAR15    | 430                | N                 | Y                      | P                | N                     | Negative                           | Positive                                           | Negative                             |
| 327    | 7            | 20MAR15    | 502                | N                 | N                      | N                | N                     | Negative                           | Positive                                           | Negative                             |
| 329    | 15           | 20MAR15    | 465                | N                 | Y                      | N                | N                     | Negative                           | Positive                                           | Negative                             |
| 33     | 12           | 06MAR15    | 510                | N                 | N                      | N                | N                     | Negative                           | Positive                                           | Positive                             |
| 330    | 8            | 20MAR15    | 454                | N                 | N                      | N                | N                     | Negative                           | Positive                                           | Negative                             |
| 332    | 9            | 20MAR15    | 450                | N                 | N                      | N                | N                     | Negative                           | Positive                                           | Negative                             |

DATA HAVE NOT BEEN VERIFIED

[1] Did not qualify for BRD re-treatment, not a BRD mortality and not removed for non-BRD reasons

PHASE IV ALL SPECIES STUDY BOVINE  
 STUDY: A131R-US-13-231  
 TREATMENT SUCCESS RATE  
 SUMMARY BY ANIMAL

treatment=T01 test material=DRAXXIN period=First Pull

| animal | Infectious<br>Bovine<br>Rhinotracheitis<br>(qPCR-IBR-BHV) | day<br>of<br>BRD | score | temperature<br>(F) | day of<br>removal | brd<br>related | BRD<br>mortality | treatment<br>success<br>[1] |
|--------|-----------------------------------------------------------|------------------|-------|--------------------|-------------------|----------------|------------------|-----------------------------|
| 265    | Negative                                                  | 30               | 1     | 104.0              | 30                | BRD            |                  | NO                          |
| 266    | Positive                                                  |                  |       |                    |                   |                |                  | YES                         |
| 268    | Negative                                                  |                  |       |                    |                   |                |                  | YES                         |
| 271    | Negative                                                  | 28               | 2     | 105.1              | 28                | BRD            |                  | NO                          |
| 272    | Negative                                                  |                  |       |                    |                   |                |                  | YES                         |
| 275    | Negative                                                  |                  |       |                    | 25                | BRD            |                  | NO                          |
| 277    | Negative                                                  |                  |       |                    |                   |                |                  | YES                         |
| 278    | Negative                                                  |                  |       |                    |                   |                |                  | YES                         |
| 280    | Negative                                                  |                  |       |                    | 24                | BRD            |                  | NO                          |
| 287    | Negative                                                  |                  |       |                    |                   |                |                  | YES                         |
| 288    | Negative                                                  |                  |       |                    |                   |                |                  | YES                         |
| 291    | Positive                                                  | 20               | 2     | 104.2              | 20                | BRD            |                  | NO                          |
| 292    | Negative                                                  |                  |       |                    | 24                | BRD            |                  | NO                          |
| 295    | Negative                                                  |                  |       |                    | 22                | BRD            |                  | NO                          |
| 3      | Negative                                                  |                  |       |                    |                   |                |                  | YES                         |
| 30     | Positive                                                  |                  |       |                    | 12                | BRD            |                  | NO                          |
| 300    | Negative                                                  |                  |       |                    | 35                | BRD            |                  | NO                          |
| 301    | Negative                                                  |                  |       |                    | 15                | BRD            |                  | NO                          |
| 302    | Negative                                                  |                  |       |                    |                   |                |                  | YES                         |
| 309    | Negative                                                  |                  |       |                    |                   |                |                  | YES                         |
| 311    | Negative                                                  | 19               | 2     | 105.7              | 19                | BRD            |                  | NO                          |
| 312    | Negative                                                  |                  |       |                    |                   |                |                  | YES                         |
| 315    | Negative                                                  |                  |       |                    |                   |                |                  | YES                         |
| 318    | Negative                                                  | 32               | 1     | 103.8              | 32                | BRD            |                  | NO                          |
| 319    | Negative                                                  |                  |       |                    | 18                | BRD            |                  | NO                          |
| 320    | Negative                                                  |                  |       |                    |                   |                |                  | YES                         |
| 323    | Negative                                                  |                  |       |                    |                   |                |                  | YES                         |
| 327    | Negative                                                  |                  |       |                    |                   |                |                  | YES                         |
| 329    | Negative                                                  |                  |       |                    |                   |                |                  | YES                         |
| 33     | Positive                                                  |                  |       |                    | 21                | BRD            |                  | NO                          |
| 330    | Negative                                                  |                  |       |                    | 12                | BRD            |                  | NO                          |
| 332    | Negative                                                  |                  |       |                    |                   |                |                  | YES                         |

DATA HAVE NOT BEEN VERIFIED

[1] Did not qualify for BRD re-treatment, not a BRD mortality and not removed for non-BRD reasons



PHASE IV ALL SPECIES STUDY BOVINE  
 STUDY: A131R-US-13-231  
 TREATMENT SUCCESS RATE  
 SUMMARY BY ANIMAL

treatment=T01 test material=DRAXXIN period=First Pull

| animal | day of study | day 0 date | day 0 weight (LBS) | histophilus sommi | mannheimia haemolytica | mycoplasma bovis | pasteurella multocida | Bovine Parainfluenza 3 (qPCR-BPI3) | Bovine Respiratory Syncytial Virus (qPCR-BRSV-PCR) | Bovine Viral Diarrhea (qPCR-BVD-PCR) |
|--------|--------------|------------|--------------------|-------------------|------------------------|------------------|-----------------------|------------------------------------|----------------------------------------------------|--------------------------------------|
| 34     | 8            | 06MAR15    | 529                | N                 | N                      | Y                | N                     |                                    |                                                    |                                      |
| 341    | 10           | 20MAR15    | 471                | N                 | N                      | N                | N                     | Negative                           | Positive                                           | Positive                             |
| 342    | 7            | 20MAR15    | 459                | N                 | N                      | N                | N                     | Negative                           | Negative                                           | Negative                             |
| 343    | 18           | 20MAR15    | 557                | N                 | Y                      | N                | N                     | Negative                           | Positive                                           | Negative                             |
| 346    | 13           | 20MAR15    | 422                | N                 | N                      | P                | Y                     | Negative                           | Negative                                           | Negative                             |
| 349    | 16           | 20MAR15    | 441                | N                 | Y                      | P                | N                     | Positive                           | Positive                                           | Negative                             |
| 35     | 16           | 06MAR15    | 495                | N                 | N                      | N                | N                     | Positive                           | Negative                                           | Negative                             |
| 350    | 21           | 20MAR15    | 471                | N                 | N                      | N                | N                     | Negative                           | Negative                                           | Negative                             |
| 353    | 19           | 20MAR15    | 457                | N                 | N                      | N                | N                     | Positive                           | Positive                                           | Negative                             |
| 356    | 7            | 20MAR15    | 404                | N                 | N                      | N                | N                     | Negative                           | Negative                                           | Negative                             |
| 357    | 11           | 20MAR15    | 429                | N                 | N                      | N                | N                     | Positive                           | Positive                                           | Positive                             |
| 365    | 19           | 20MAR15    | 457                | N                 | Y                      | N                | N                     | Negative                           | Positive                                           | Negative                             |
| 366    | 10           | 20MAR15    | 434                | N                 | N                      | N                | N                     | Negative                           | Positive                                           | Positive                             |
| 367    | 14           | 20MAR15    | 474                | N                 | Y                      | N                | N                     | Negative                           | Positive                                           | Negative                             |
| 369    | 15           | 20MAR15    | 507                | N                 | N                      | N                | N                     | Negative                           | Positive                                           | Negative                             |
| 37     | 10           | 06MAR15    | 564                | N                 | N                      | Y                | N                     | Negative                           | Negative                                           | Positive                             |
| 370    | 12           | 20MAR15    | 452                | N                 | N                      | N                | N                     | Negative                           | Negative                                           | Negative                             |
| 373    | 20           | 20MAR15    | 449                | N                 | N                      | N                | N                     | Negative                           | Negative                                           | Negative                             |
| 374    | 13           | 20MAR15    | 475                | N                 | Y                      | P                | N                     | Positive                           | Negative                                           | Negative                             |
| 377    | 23           | 20MAR15    | 436                | N                 | Y                      | P                | N                     | Negative                           | Negative                                           | Negative                             |
| 378    | 10           | 20MAR15    | 495                | N                 | N                      | Y                | N                     | Negative                           | Negative                                           | Positive                             |
| 379    | 10           | 20MAR15    | 475                | N                 | N                      | Y                | N                     | Negative                           | Negative                                           | Negative                             |
| 38     | 11           | 06MAR15    | 464                | N                 | N                      | N                | N                     | Negative                           | Negative                                           | Positive                             |
| 380    | 15           | 20MAR15    | 411                | N                 | N                      | P                | N                     | Negative                           | Negative                                           | Negative                             |
| 385    | 9            | 20MAR15    | 484                | N                 | N                      | N                | N                     | Negative                           | Positive                                           | Negative                             |
| 386    | 12           | 20MAR15    | 546                | N                 | N                      | N                | N                     | Negative                           | Negative                                           | Negative                             |
| 388    | 15           | 20MAR15    | 471                | N                 | Y                      | P                | N                     | Negative                           | Negative                                           | Negative                             |
| 39     | 12           | 06MAR15    | 542                | N                 | N                      | Y                | N                     | Negative                           | Positive                                           | Positive                             |
| 390    | 16           | 20MAR15    | 573                | N                 | Y                      | P                | N                     | Negative                           | Positive                                           | Negative                             |
| 391    | 14           | 20MAR15    | 597                | N                 | Y                      | P                | N                     | Negative                           | Positive                                           | Negative                             |
| 395    | 7            | 20MAR15    | 614                | N                 | N                      | N                | N                     | Negative                           | Positive                                           | Negative                             |
| 396    | 19           | 20MAR15    | 536                | N                 | N                      | P                | N                     | Positive                           | Positive                                           | Negative                             |

DATA HAVE NOT BEEN VERIFIED

[1] Did not qualify for BRD re-treatment, not a BRD mortality and not removed for non-BRD reasons

PHASE IV ALL SPECIES STUDY BOVINE  
 STUDY: A131R-US-13-231  
 TREATMENT SUCCESS RATE  
 SUMMARY BY ANIMAL

treatment=T01 test material=DRAXXIN period=First Pull

| animal | Infectious<br>Bovine<br>Rhinotracheitis<br>(qPCR-IBR-BHV) | day<br>of<br>BRD | score | temperature<br>(F) | day of<br>removal | brd<br>related | BRD<br>mortality | treatment<br>success<br>[1] |
|--------|-----------------------------------------------------------|------------------|-------|--------------------|-------------------|----------------|------------------|-----------------------------|
| 34     |                                                           |                  |       |                    | 15                | BRD            |                  | NO                          |
| 341    | Negative                                                  |                  |       |                    | 16                | BRD            |                  | NO                          |
| 342    | Negative                                                  |                  |       |                    |                   |                |                  | YES                         |
| 343    | Negative                                                  | 26               | 1     | 104.5              | 26                | BRD            |                  | NO                          |
| 346    | Positive                                                  | 23               | 3     | 105.8              | 23                | BRD            |                  | NO                          |
| 349    | Negative                                                  | 27               | 1     | 104.8              | 27                | BRD            |                  | NO                          |
| 35     | Negative                                                  |                  |       |                    |                   |                |                  | YES                         |
| 350    | Negative                                                  |                  |       |                    |                   |                |                  | YES                         |
| 353    | Negative                                                  |                  |       |                    |                   |                |                  | YES                         |
| 356    | Negative                                                  |                  |       |                    | 18                | BRD            |                  | NO                          |
| 357    | Negative                                                  |                  |       |                    | 15                | BRD            | YES              | NO                          |
| 365    | Negative                                                  | 27               | 1     | 105.3              | 27                | BRD            |                  | NO                          |
| 366    | Negative                                                  |                  |       |                    | 17                | BRD            |                  | NO                          |
| 367    | Negative                                                  | 17               | 3     | 105.6              | 17                | BRD            |                  | NO                          |
| 369    | Negative                                                  |                  |       |                    |                   |                |                  | YES                         |
| 37     | Negative                                                  |                  |       |                    |                   |                |                  | YES                         |
| 370    | Negative                                                  |                  |       |                    | 16                | BRD            |                  | NO                          |
| 373    | Negative                                                  |                  |       |                    |                   |                |                  | YES                         |
| 374    | Negative                                                  | 15               | 3     | 104.5              | 15                | BRD            | YES              | NO                          |
| 377    | Negative                                                  |                  |       |                    |                   |                |                  | YES                         |
| 378    | Negative                                                  |                  |       |                    | 17                | BRD            |                  | NO                          |
| 379    | Negative                                                  |                  |       |                    | 16                | BRD            |                  | NO                          |
| 38     | Negative                                                  |                  |       |                    |                   |                |                  | YES                         |
| 380    | Negative                                                  |                  |       |                    | 18                | BRD            |                  | NO                          |
| 385    | Negative                                                  |                  |       |                    |                   |                |                  | YES                         |
| 386    | Negative                                                  |                  |       |                    |                   |                |                  | YES                         |
| 388    | Negative                                                  | 19               | 3     | 104.5              | 19                | BRD            |                  | NO                          |
| 39     | Positive                                                  |                  |       |                    | 29                | BRD            |                  | NO                          |
| 390    | Negative                                                  |                  |       |                    |                   |                |                  | YES                         |
| 391    | Negative                                                  | 21               | 2     | 106.0              | 21                | BRD            |                  | NO                          |
| 395    | Negative                                                  |                  |       |                    |                   |                |                  | YES                         |
| 396    | Negative                                                  |                  |       |                    |                   |                |                  | YES                         |

DATA HAVE NOT BEEN VERIFIED

[1] Did not qualify for BRD re-treatment, not a BRD mortality and not removed for non-BRD reasons

PHASE IV ALL SPECIES STUDY BOVINE  
 STUDY: A131R-US-13-231  
 TREATMENT SUCCESS RATE  
 SUMMARY BY ANIMAL

treatment=T01 test material=DRAXXIN period=First Pull

| animal | day of study | day 0 date | day 0 weight (LBS) | histophilus sommi | mannheimia haemolytica | mycoplasma bovis | pasteurella multocida | Bovine Parainfluenza 3 (qPCR-BPI3) | Bovine Respiratory Syncytial Virus (qPCR-BRSV-PCR) | Bovine Viral Diarrhea (qPCR-BVD-PCR) |
|--------|--------------|------------|--------------------|-------------------|------------------------|------------------|-----------------------|------------------------------------|----------------------------------------------------|--------------------------------------|
| 406    | 17           | 20MAR15    | 533                | N                 | Y                      | P                | N                     | Positive                           | Negative                                           | Negative                             |
| 407    | 11           | 20MAR15    | 537                | N                 | N                      | N                | N                     | Negative                           | Positive                                           | Negative                             |
| 410    | 10           | 20MAR15    | 505                | N                 | N                      | N                | N                     | Negative                           | Positive                                           | Negative                             |
| 411    | 12           | 20MAR15    | 538                | N                 | Y                      | Y                | N                     | Negative                           | Positive                                           | Negative                             |
| 415    | 10           | 20MAR15    | 521                | N                 | Y                      | N                | N                     | Positive                           | Positive                                           | Negative                             |
| 416    | 13           | 20MAR15    | 489                | N                 | Y                      | P                | N                     | Negative                           | Positive                                           | Negative                             |
| 417    | 7            | 20MAR15    | 515                | N                 | N                      | N                | N                     | Negative                           | Positive                                           | Positive                             |
| 422    | 15           | 20MAR15    | 514                | N                 | Y                      | P                | N                     | Negative                           | Positive                                           | Negative                             |
| 428    | 14           | 20MAR15    | 515                | N                 | N                      | P                | Y                     | Negative                           | Positive                                           | Negative                             |
| 431    | 19           | 20MAR15    | 537                | N                 | N                      | N                | N                     | Negative                           | Positive                                           | Negative                             |
| 433    | 12           | 20MAR15    | 546                | N                 | N                      | Y                | Y                     | Negative                           | Positive                                           | Negative                             |
| 436    | 19           | 20MAR15    | 537                | N                 | N                      | N                | N                     | Negative                           | Positive                                           | Negative                             |
| 437    | 11           | 20MAR15    | 544                | N                 | N                      | N                | N                     | Negative                           | Positive                                           | Negative                             |
| 44     | 10           | 06MAR15    | 450                | N                 | N                      | Y                | N                     | Negative                           | Negative                                           | Positive                             |
| 440    | 7            | 20MAR15    | 508                | N                 | N                      | N                | N                     | Negative                           | Positive                                           | Negative                             |
| 441    | 19           | 20MAR15    | 506                | N                 | N                      | N                | N                     | Negative                           | Positive                                           | Negative                             |
| 445    | 12           | 20MAR15    | 551                | N                 | Y                      | N                | N                     | Positive                           | Positive                                           | Negative                             |
| 447    | 12           | 20MAR15    | 515                | N                 | N                      | N                | N                     | Negative                           | Positive                                           | Negative                             |
| 448    | 10           | 20MAR15    | 533                | N                 | N                      | N                | N                     | Negative                           | Positive                                           | Negative                             |
| 45     | 7            | 06MAR15    | 430                | N                 | N                      | N                | N                     | Negative                           | Negative                                           | Negative                             |
| 450    | 11           | 20MAR15    | 541                | N                 | N                      | N                | N                     | Negative                           | Positive                                           | Negative                             |
| 452    | 23           | 20MAR15    | 530                | Y                 | N                      | N                | Y                     | Negative                           | Negative                                           | Negative                             |
| 453    | 7            | 20MAR15    | 538                | N                 | N                      | N                | N                     | Negative                           | Positive                                           | Negative                             |
| 454    | 11           | 20MAR15    | 523                | Y                 | Y                      | Y                | N                     | Negative                           | Positive                                           | Positive                             |
| 456    | 10           | 20MAR15    | 548                | N                 | N                      | N                | N                     | Negative                           | Positive                                           | Positive                             |
| 458    | 12           | 20MAR15    | 552                | N                 | N                      | Y                | N                     | Negative                           | Positive                                           | Negative                             |
| 46     | 7            | 06MAR15    | 470                | N                 | N                      | N                | N                     | Negative                           | Negative                                           | Negative                             |
| 460    | 24           | 20MAR15    | 508                | N                 | N                      | N                | N                     | Negative                           | Negative                                           | Negative                             |
| 461    | 9            | 20MAR15    | 543                | N                 | N                      | N                | N                     | Negative                           | Negative                                           | Negative                             |
| 462    | 15           | 20MAR15    | 524                |                   |                        |                  |                       | Negative                           | Positive                                           | Positive                             |
| 463    | 15           | 20MAR15    | 587                | N                 | N                      | N                | N                     | Negative                           | Negative                                           | Negative                             |
| 467    | 21           | 20MAR15    | 560                | N                 | N                      | P                | Y                     | Negative                           | Negative                                           | Negative                             |

DATA HAVE NOT BEEN VERIFIED

[1] Did not qualify for BRD re-treatment, not a BRD mortality and not removed for non-BRD reasons

PHASE IV ALL SPECIES STUDY BOVINE  
 STUDY: A131R-US-13-231  
 TREATMENT SUCCESS RATE  
 SUMMARY BY ANIMAL

treatment=T01 test material=DRAXXIN period=First Pull

| animal | Infectious<br>Bovine<br>Rhinotracheitis<br>(qPCR-IBR-BHV) | day<br>of<br>BRD | score | temperature<br>(F) | day of<br>removal | brd<br>related | BRD<br>mortality | treatment<br>success<br>[1] |
|--------|-----------------------------------------------------------|------------------|-------|--------------------|-------------------|----------------|------------------|-----------------------------|
| 406    | Negative                                                  |                  |       |                    |                   |                |                  | YES                         |
| 407    | Negative                                                  |                  |       |                    |                   |                |                  | YES                         |
| 410    | Negative                                                  |                  |       |                    | 17                | BRD            |                  | NO                          |
| 411    | Negative                                                  |                  |       |                    |                   |                |                  | YES                         |
| 415    | Negative                                                  | 17               | 1     | 104.8              | 17                | BRD            |                  | NO                          |
| 416    | Positive                                                  |                  |       |                    |                   |                |                  | YES                         |
| 417    | Negative                                                  |                  |       |                    | 15                | BRD            |                  | NO                          |
| 422    | Positive                                                  | 18               | 3     | 104.5              | 18                | BRD            |                  | NO                          |
| 428    | Negative                                                  |                  |       |                    |                   |                |                  | YES                         |
| 431    | Negative                                                  |                  |       |                    |                   |                |                  | YES                         |
| 433    | Positive                                                  | 15               | 3     | 104.4              | 15                | BRD            |                  | NO                          |
| 436    | Negative                                                  |                  |       |                    |                   |                |                  | YES                         |
| 437    | Negative                                                  |                  |       |                    | 30                | BRD            |                  | NO                          |
| 44     | Negative                                                  |                  |       |                    | 19                | BRD            |                  | NO                          |
| 440    | Negative                                                  |                  |       |                    | 20                | BRD            |                  | NO                          |
| 441    | Negative                                                  |                  |       |                    |                   |                |                  | YES                         |
| 445    | Negative                                                  |                  |       |                    |                   |                |                  | YES                         |
| 447    | Negative                                                  |                  |       |                    | 20                | BRD            |                  | NO                          |
| 448    | Negative                                                  |                  |       |                    | 15                | BRD            |                  | NO                          |
| 45     | Negative                                                  |                  |       |                    | 20                | BRD            |                  | NO                          |
| 450    | Positive                                                  |                  |       |                    | 18                | BRD            |                  | NO                          |
| 452    | Negative                                                  | 25               | 3     | 106.2              | 25                | BRD            |                  | NO                          |
| 453    | Negative                                                  |                  |       |                    |                   |                |                  | YES                         |
| 454    | Positive                                                  | 18               | 1     | 103.8              | 18                | BRD            |                  | NO                          |
| 456    | Negative                                                  |                  |       |                    | 15                | BRD            |                  | NO                          |
| 458    | Negative                                                  |                  |       |                    | 20                | BRD            |                  | NO                          |
| 46     | Negative                                                  |                  |       |                    |                   |                |                  | YES                         |
| 460    | Negative                                                  |                  |       |                    |                   |                |                  | YES                         |
| 461    | Negative                                                  |                  |       |                    |                   |                |                  | YES                         |
| 462    | Negative                                                  |                  |       |                    |                   |                |                  | YES                         |
| 463    | Negative                                                  |                  |       |                    |                   |                |                  | YES                         |
| 467    | Negative                                                  |                  |       |                    |                   |                |                  | YES                         |

DATA HAVE NOT BEEN VERIFIED

[1] Did not qualify for BRD re-treatment, not a BRD mortality and not removed for non-BRD reasons

PHASE IV ALL SPECIES STUDY BOVINE  
 STUDY: A131R-US-13-231  
 TREATMENT SUCCESS RATE  
 SUMMARY BY ANIMAL

treatment=T01 test material=DRAXXIN period=First Pull

| animal | day of study | day 0 date | day 0 weight (LBS) | histophilus sommi | mannheimia haemolytica | mycoplasma bovis | pasteurella multocida | Bovine Parainfluenza 3 (qPCR-BPI3) | Bovine Respiratory Syncytial Virus (qPCR-BRSV-PCR) | Bovine Viral Diarrhea (qPCR-BVD-PCR) |
|--------|--------------|------------|--------------------|-------------------|------------------------|------------------|-----------------------|------------------------------------|----------------------------------------------------|--------------------------------------|
| 469    | 8            | 23MAR15    | 432                | N                 | N                      | Y                | N                     | Positive                           | Positive                                           | Negative                             |
| 470    | 15           | 23MAR15    | 497                | N                 | N                      | N                | N                     | Negative                           | Negative                                           | Negative                             |
| 471    | 16           | 23MAR15    | 529                | N                 | Y                      | N                | N                     | Positive                           | Positive                                           | Negative                             |
| 473    | 11           | 23MAR15    | 450                | N                 | N                      | N                | N                     | Negative                           | Negative                                           | Negative                             |
| 474    | 12           | 23MAR15    | 502                | N                 | N                      | N                | N                     | Negative                           | Negative                                           | Negative                             |
| 476    | 10           | 23MAR15    | 532                | N                 | N                      | P                | N                     | Positive                           | Positive                                           | Positive                             |
| 477    | 8            | 23MAR15    | 445                | N                 | N                      | N                | N                     | Negative                           | Positive                                           | Positive                             |
| 478    | 11           | 23MAR15    | 555                | N                 | Y                      | P                | N                     | Positive                           | Negative                                           | Negative                             |
| 484    | 14           | 23MAR15    | 537                | N                 | Y                      | N                | N                     | Positive                           | Positive                                           | Negative                             |
| 485    | 7            | 23MAR15    | 504                | N                 | N                      | N                | N                     | Positive                           | Positive                                           | Negative                             |
| 486    | 15           | 23MAR15    | 484                | N                 | Y                      | N                | Y                     | Negative                           | Positive                                           | Negative                             |
| 487    | 36           | 23MAR15    | 579                | N                 | N                      | P                | Y                     | Negative                           | Negative                                           | Negative                             |
| 488    | 10           | 23MAR15    | 430                | N                 | N                      | P                | N                     | Positive                           | Negative                                           | Negative                             |
| 489    | 7            | 23MAR15    | 503                | N                 | N                      | P                | N                     | Positive                           | Positive                                           | Negative                             |
| 49     | 21           | 06MAR15    | 484                | Y                 | N                      | Y                | N                     | Negative                           | Negative                                           | Negative                             |
| 491    | 7            | 23MAR15    | 482                | N                 | Y                      | N                | N                     | Positive                           | Negative                                           | Negative                             |
| 492    | 10           | 23MAR15    | 537                | N                 | Y                      | P                | N                     | Positive                           | Negative                                           | Negative                             |
| 493    | 9            | 23MAR15    | 505                | N                 | N                      | N                | N                     | Negative                           | Positive                                           | Negative                             |
| 494    | 7            | 23MAR15    | 428                | N                 | N                      | N                | N                     | Negative                           | Positive                                           | Negative                             |
| 496    | 12           | 23MAR15    | 542                |                   |                        |                  |                       | Negative                           | Negative                                           | Negative                             |
| 497    | 9            | 23MAR15    | 439                | N                 | N                      | N                | N                     | Negative                           | Positive                                           | Negative                             |
| 499    | 7            | 23MAR15    | 420                | N                 | N                      | N                | N                     | Positive                           | Positive                                           | Negative                             |
| 5      | 10           | 06MAR15    | 472                | N                 | N                      | N                | N                     | Negative                           | Negative                                           | Negative                             |
| 501    | 12           | 23MAR15    | 551                | N                 | N                      | N                | N                     | Negative                           | Negative                                           | Negative                             |
| 503    | 24           | 23MAR15    | 512                | Y                 | N                      | P                | N                     | Negative                           | Negative                                           | Negative                             |
| 505    | 7            | 23MAR15    | 486                | N                 | Y                      | Y                | N                     | Negative                           | Negative                                           | Negative                             |
| 506    | 15           | 23MAR15    | 539                | N                 | Y                      | P                | N                     | Positive                           | Positive                                           | Negative                             |
| 508    | 15           | 23MAR15    | 485                | N                 | N                      | P                | N                     | Negative                           | Positive                                           | Negative                             |
| 509    | 8            | 23MAR15    | 457                | N                 | Y                      | Y                | N                     | Positive                           | Positive                                           | Negative                             |
| 51     | 10           | 06MAR15    | 514                | N                 | Y                      | Y                | N                     | Negative                           | Negative                                           | Negative                             |
| 510    | 16           | 23MAR15    | 575                | Y                 | Y                      | P                | N                     | Positive                           | Positive                                           | Negative                             |
| 511    | 11           | 23MAR15    | 485                | N                 | N                      | N                | N                     | Positive                           | Positive                                           | Positive                             |

DATA HAVE NOT BEEN VERIFIED

[1] Did not qualify for BRD re-treatment, not a BRD mortality and not removed for non-BRD reasons

PHASE IV ALL SPECIES STUDY BOVINE  
 STUDY: A131R-US-13-231  
 TREATMENT SUCCESS RATE  
 SUMMARY BY ANIMAL

treatment=T01 test material=DRAXXIN period=First Pull

| animal | Infectious<br>Bovine<br>Rhinotracheitis<br>(qPCR-IBR-BHV) | day<br>of<br>BRD | score | temperature<br>(F) | day of<br>removal | brd<br>related | BRD<br>mortality | treatment<br>success<br>[1] |
|--------|-----------------------------------------------------------|------------------|-------|--------------------|-------------------|----------------|------------------|-----------------------------|
| 469    | Negative                                                  |                  |       |                    | 17                | BRD            |                  | NO                          |
| 470    | Negative                                                  |                  |       |                    | 18                | BRD            |                  | NO                          |
| 471    | Negative                                                  | 18               | 3     | 104.1              | 18                | BRD            |                  | NO                          |
| 473    | Negative                                                  |                  |       |                    | 18                | BRD            |                  | NO                          |
| 474    | Negative                                                  |                  |       |                    |                   |                |                  | YES                         |
| 476    | Positive                                                  |                  |       |                    | 15                | BRD            |                  | NO                          |
| 477    | Negative                                                  |                  |       |                    | 18                | BRD            |                  | NO                          |
| 478    | Negative                                                  | 32               | 2     | 103.8              | 32                | BRD            |                  | NO                          |
| 484    | Negative                                                  |                  |       |                    |                   |                |                  | YES                         |
| 485    | Negative                                                  |                  |       |                    | 16                | BRD            |                  | NO                          |
| 486    | Negative                                                  | 18               | 3     | 107.4              | 18                | BRD            |                  | NO                          |
| 487    | Negative                                                  | 40               | 3     | 105.1              | 40                | BRD            |                  | NO                          |
| 488    | Negative                                                  |                  |       |                    | 22                | BRD            |                  | NO                          |
| 489    | Negative                                                  |                  |       |                    | 15                | BRD            |                  | NO                          |
| 49     | Negative                                                  |                  |       |                    |                   |                |                  | YES                         |
| 491    | Negative                                                  | 22               | 1     | 105.0              | 22                | BRD            |                  | NO                          |
| 492    | Positive                                                  | 14               | 3     | 104.1              | 14                | BRD            |                  | NO                          |
| 493    | Negative                                                  |                  |       |                    | 17                | BRD            |                  | NO                          |
| 494    | Negative                                                  |                  |       |                    | 19                | BRD            |                  | NO                          |
| 496    | Negative                                                  |                  |       |                    |                   |                |                  | YES                         |
| 497    | Negative                                                  |                  |       |                    | 20                | BRD            |                  | NO                          |
| 499    | Negative                                                  |                  |       |                    | 16                | BRD            |                  | NO                          |
| 5      | Negative                                                  |                  |       |                    | 20                | BRD            |                  | NO                          |
| 501    | Negative                                                  |                  |       |                    |                   |                |                  | YES                         |
| 503    | Negative                                                  |                  |       |                    |                   |                |                  | YES                         |
| 505    | Negative                                                  | 15               | 1     | 103.9              | 15                | BRD            |                  | NO                          |
| 506    | Negative                                                  |                  |       |                    |                   |                |                  | YES                         |
| 508    | Negative                                                  |                  |       |                    | 18                | BRD            |                  | NO                          |
| 509    | Negative                                                  | 21               | 2     | 102.5              | 21                | BRD            |                  | NO                          |
| 51     | Negative                                                  | 17               | 2     | 104.6              | 17                | BRD            |                  | NO                          |
| 510    | Negative                                                  | 24               | 1     | 104.0              | 24                | BRD            |                  | NO                          |
| 511    | Negative                                                  |                  |       |                    | 16                | BRD            |                  | NO                          |

DATA HAVE NOT BEEN VERIFIED

[1] Did not qualify for BRD re-treatment, not a BRD mortality and not removed for non-BRD reasons

PHASE IV ALL SPECIES STUDY BOVINE  
 STUDY: A131R-US-13-231  
 TREATMENT SUCCESS RATE  
 SUMMARY BY ANIMAL

treatment=T01 test material=DRAXXIN period=First Pull

| animal | day of study | day 0 date | day 0 weight (LBS) | histophilus sommi | mannheimia haemolytica | mycoplasma bovis | pasteurella multocida | Bovine Parainfluenza 3 (qPCR-BPI3) | Bovine Respiratory Syncytial Virus (qPCR-BRSV-PCR) | Bovine Viral Diarrhea (qPCR-BVD-PCR) |
|--------|--------------|------------|--------------------|-------------------|------------------------|------------------|-----------------------|------------------------------------|----------------------------------------------------|--------------------------------------|
| 512    | 10           | 23MAR15    | 573                | N                 | N                      | P                | Y                     | Negative                           | Negative                                           | Positive                             |
| 513    | 21           | 23MAR15    | 527                | Y                 | N                      | N                | N                     | Negative                           | Negative                                           | Negative                             |
| 517    | 8            | 23MAR15    | 480                | N                 | N                      | N                | N                     | Negative                           | Positive                                           | Negative                             |
| 518    | 10           | 23MAR15    | 518                | N                 | Y                      | N                | N                     | Negative                           | Positive                                           | Negative                             |
| 519    | 15           | 23MAR15    | 506                | N                 | N                      | N                | N                     | Positive                           | Positive                                           | Negative                             |
| 52     | 12           | 06MAR15    | 509                | N                 | N                      | N                | N                     | Negative                           | Negative                                           | Positive                             |
| 520    | 7            | 23MAR15    | 545                | N                 | N                      | Y                | Y                     | Negative                           | Positive                                           | Negative                             |
| 522    | 9            | 23MAR15    | 478                | N                 | N                      | N                | N                     | Negative                           | Negative                                           | Negative                             |
| 524    | 15           | 23MAR15    | 500                | N                 | Y                      | P                | N                     | Positive                           | Negative                                           | Negative                             |
| 526    | 12           | 23MAR15    | 568                | N                 | N                      | N                | N                     | Negative                           | Positive                                           | Negative                             |
| 531    | 15           | 23MAR15    | 490                | N                 | Y                      | P                | N                     | Negative                           | Negative                                           | Negative                             |
| 532    | 13           | 23MAR15    | 496                | N                 | N                      | N                | N                     | Negative                           | Positive                                           | Negative                             |
| 537    | 17           | 23MAR15    | 491                | N                 | Y                      | P                | N                     | Negative                           | Positive                                           | Negative                             |
| 541    | 12           | 23MAR15    | 502                | N                 | Y                      | N                | N                     | Negative                           | Negative                                           | Negative                             |
| 542    | 19           | 23MAR15    | 473                | N                 | Y                      | P                | Y                     | Negative                           | Negative                                           | Negative                             |
| 543    | 11           | 23MAR15    | 510                | N                 | N                      | N                | N                     | Negative                           | Negative                                           | Negative                             |
| 547    | 36           | 23MAR15    | 433                | N                 | Y                      | N                | N                     | Negative                           | Negative                                           | Negative                             |
| 548    | 11           | 23MAR15    | 480                | N                 | N                      | N                | N                     | Negative                           | Positive                                           | Negative                             |
| 549    | 14           | 23MAR15    | 469                | Y                 | N                      | P                | Y                     | Negative                           | Negative                                           | Negative                             |
| 55     | 10           | 06MAR15    | 470                | N                 | N                      | N                | N                     | Negative                           | Negative                                           | Positive                             |
| 550    | 26           | 23MAR15    | 542                | N                 | N                      | P                | N                     | Negative                           | Negative                                           | Negative                             |
| 551    | 36           | 23MAR15    | 490                | N                 | N                      | P                | N                     | Negative                           | Negative                                           | Negative                             |
| 552    | 8            | 23MAR15    | 469                | N                 | N                      | N                | N                     | Negative                           | Positive                                           | Negative                             |
| 556    | 7            | 23MAR15    | 577                | N                 | N                      | N                | N                     | Negative                           | Negative                                           | Negative                             |
| 561    | 20           | 23MAR15    | 569                | Y                 | N                      | N                | N                     | Negative                           | Negative                                           | Negative                             |
| 564    | 11           | 23MAR15    | 481                | N                 | N                      | N                | Y                     | Negative                           | Positive                                           | Negative                             |
| 57     | 9            | 06MAR15    | 496                | N                 | N                      | Y                | N                     |                                    |                                                    |                                      |
| 570    | 10           | 23MAR15    | 633                | N                 | N                      | N                | N                     | Positive                           | Positive                                           | Negative                             |
| 571    | 16           | 23MAR15    | 501                | Y                 | N                      | N                | N                     | Positive                           | Positive                                           | Negative                             |
| 576    | 7            | 23MAR15    | 563                | N                 | N                      | N                | N                     | Negative                           | Negative                                           | Negative                             |
| 582    | 29           | 23MAR15    | 554                | N                 | N                      | P                | N                     | Negative                           | Negative                                           | Negative                             |
| 583    | 8            | 23MAR15    | 566                | N                 | N                      | Y                | N                     | Negative                           | Positive                                           | Negative                             |

DATA HAVE NOT BEEN VERIFIED

[1] Did not qualify for BRD re-treatment, not a BRD mortality and not removed for non-BRD reasons

PHASE IV ALL SPECIES STUDY BOVINE  
 STUDY: A131R-US-13-231  
 TREATMENT SUCCESS RATE  
 SUMMARY BY ANIMAL

treatment=T01 test material=DRAXXIN period=First Pull

| animal | Infectious<br>Bovine<br>Rhinotracheitis<br>(qPCR-IBR-BHV) | day<br>of<br>BRD | score | temperature<br>(F) | day of<br>removal | brd<br>related | BRD<br>mortality | treatment<br>success<br>[1] |
|--------|-----------------------------------------------------------|------------------|-------|--------------------|-------------------|----------------|------------------|-----------------------------|
| 512    | Positive                                                  |                  |       |                    |                   |                |                  | YES                         |
| 513    | Negative                                                  |                  |       |                    |                   |                |                  | YES                         |
| 517    | Negative                                                  |                  |       |                    | 15                | BRD            |                  | NO                          |
| 518    | Negative                                                  |                  |       |                    |                   |                |                  | YES                         |
| 519    | Negative                                                  |                  |       |                    |                   |                |                  | YES                         |
| 52     | Positive                                                  |                  |       |                    | 19                | BRD            |                  | NO                          |
| 520    | Negative                                                  | 15               | 1     | 104.6              | 15                | BRD            |                  | NO                          |
| 522    | Negative                                                  |                  |       |                    | 27                | BRD            |                  | NO                          |
| 524    | Negative                                                  | 22               | 1     | 105.0              | 22                | BRD            |                  | NO                          |
| 526    | Negative                                                  |                  |       |                    |                   |                |                  | YES                         |
| 531    | Negative                                                  | 22               | 1     | 105.8              | 22                | BRD            |                  | NO                          |
| 532    | Negative                                                  |                  |       |                    |                   |                |                  | YES                         |
| 537    | Negative                                                  | 22               | 3     | 106.7              | 22                | BRD            |                  | NO                          |
| 541    | Negative                                                  | 19               | 1     | 104.6              | 19                | BRD            |                  | NO                          |
| 542    | Positive                                                  |                  |       |                    |                   |                |                  | YES                         |
| 543    | Negative                                                  |                  |       |                    | 19                | BRD            |                  | NO                          |
| 547    | Negative                                                  |                  |       |                    |                   |                |                  | YES                         |
| 548    | Positive                                                  |                  |       |                    | 19                | BRD            |                  | NO                          |
| 549    | Negative                                                  | 29               | 1     | 104.5              | 29                | BRD            |                  | NO                          |
| 55     | Negative                                                  |                  |       |                    |                   |                |                  | YES                         |
| 550    | Negative                                                  |                  |       |                    |                   |                |                  | YES                         |
| 551    | Negative                                                  |                  |       |                    |                   |                |                  | YES                         |
| 552    | Negative                                                  |                  |       |                    | 15                | BRD            |                  | NO                          |
| 556    | Negative                                                  |                  |       |                    |                   |                |                  | YES                         |
| 561    | Negative                                                  |                  |       |                    |                   |                |                  | YES                         |
| 564    | Negative                                                  |                  |       |                    |                   |                |                  | YES                         |
| 57     |                                                           |                  |       |                    | 15                | BRD            |                  | NO                          |
| 570    | Negative                                                  |                  |       |                    |                   |                |                  | YES                         |
| 571    | Negative                                                  |                  |       |                    |                   |                |                  | YES                         |
| 576    | Negative                                                  |                  |       |                    |                   |                |                  | YES                         |
| 582    | Negative                                                  |                  |       |                    |                   |                |                  | YES                         |
| 583    | Negative                                                  |                  |       |                    | 20                | BRD            |                  | NO                          |

DATA HAVE NOT BEEN VERIFIED

[1] Did not qualify for BRD re-treatment, not a BRD mortality and not removed for non-BRD reasons



PHASE IV ALL SPECIES STUDY BOVINE  
 STUDY: A131R-US-13-231  
 TREATMENT SUCCESS RATE  
 SUMMARY BY ANIMAL

treatment=T01 test material=DRAXXIN period=First Pull

| animal | day of study | day 0 date | day 0 weight (LBS) | histophilus somni | mannheimia haemolytica | mycoplasma bovis | pasteurella multocida | Bovine Parainfluenza 3 (qPCR-BPI3) | Bovine Respiratory Syncytial Virus (qPCR-BRSV-PCR) | Bovine Viral Diarrhea (qPCR-BVD-PCR) |
|--------|--------------|------------|--------------------|-------------------|------------------------|------------------|-----------------------|------------------------------------|----------------------------------------------------|--------------------------------------|
| 585    | 16           | 23MAR15    | 540                | N                 | N                      | N                | N                     | Positive                           | Positive                                           | Negative                             |
| 595    | 16           | 23MAR15    | 619                | N                 | N                      | N                | N                     | Positive                           | Positive                                           | Negative                             |
| 601    | 8            | 23MAR15    | 554                | N                 | N                      | Y                | N                     | Negative                           | Positive                                           | Negative                             |
| 603    | 7            | 23MAR15    | 515                | N                 | N                      | N                | N                     | Negative                           | Negative                                           | Negative                             |
| 615    | 7            | 23MAR15    | 510                | N                 | N                      | N                | N                     | Negative                           | Negative                                           | Negative                             |
| 617    | 28           | 23MAR15    | 600                | N                 | N                      | N                | N                     | Negative                           | Negative                                           | Negative                             |
| 618    | 7            | 23MAR15    | 516                | N                 | Y                      | Y                | N                     | Negative                           | Positive                                           | Positive                             |
| 619    | 16           | 23MAR15    | 588                | N                 | N                      | N                | N                     | Positive                           | Positive                                           | Negative                             |
| 62     | 24           | 06MAR15    | 444                | N                 | Y                      | Y                | N                     | Negative                           | Negative                                           | Negative                             |
| 622    | 13           | 23MAR15    | 570                | N                 | N                      | N                | N                     | Negative                           | Positive                                           | Negative                             |
| 625    | 11           | 23MAR15    | 497                | N                 | Y                      | N                | N                     | Negative                           | Positive                                           | Negative                             |
| 626    | 16           | 23MAR15    | 490                | N                 | N                      | N                | N                     | Positive                           | Positive                                           | Negative                             |
| 630    | 24           | 23MAR15    | 550                | N                 | N                      | P                | N                     | Negative                           | Negative                                           | Negative                             |
| 631    | 7            | 23MAR15    | 568                | N                 | N                      | N                | N                     | Negative                           | Positive                                           | Positive                             |
| 636    | 8            | 23MAR15    | 573                | N                 | N                      | N                | N                     | Positive                           | Positive                                           | Negative                             |
| 64     | 10           | 06MAR15    | 484                | N                 | N                      | N                | N                     | Negative                           | Negative                                           | Negative                             |
| 644    | 15           | 25MAR15    | 402                | N                 | Y                      | N                | N                     | Negative                           | Negative                                           | Negative                             |
| 645    | 14           | 25MAR15    | 429                | N                 | N                      | P                | Y                     | Negative                           | Positive                                           | Negative                             |
| 65     | 11           | 06MAR15    | 503                | N                 | N                      | Y                | N                     | Negative                           | Negative                                           | Positive                             |
| 651    | 16           | 25MAR15    | 410                | N                 | N                      | N                | N                     | Negative                           | Negative                                           | Negative                             |
| 653    | 13           | 25MAR15    | 372                | N                 | N                      | N                | N                     | Negative                           | Positive                                           | Negative                             |
| 654    | 14           | 25MAR15    | 399                | N                 | N                      | N                | N                     | Negative                           | Positive                                           | Negative                             |
| 656    | 16           | 25MAR15    | 445                | N                 | N                      | N                | N                     | Negative                           | Negative                                           | Negative                             |
| 66     | 7            | 06MAR15    | 545                | Y                 | N                      | N                | N                     | Negative                           | Negative                                           | Positive                             |
| 665    | 20           | 25MAR15    | 437                | N                 | Y                      | P                | N                     | Negative                           | Negative                                           | Negative                             |
| 675    | 16           | 25MAR15    | 455                | N                 | Y                      | N                | N                     | Negative                           | Positive                                           | Negative                             |
| 680    | 16           | 25MAR15    | 378                | N                 | N                      | N                | N                     | Negative                           | Negative                                           | Negative                             |
| 69     | 10           | 06MAR15    | 497                | N                 | N                      | N                | N                     | Negative                           | Negative                                           | Positive                             |
| 692    | 17           | 25MAR15    | 413                | N                 | N                      | N                | N                     | Negative                           | Negative                                           | Negative                             |
| 693    | 15           | 25MAR15    | 433                | N                 | Y                      | P                | Y                     | Negative                           | Negative                                           | Negative                             |
| 695    | 13           | 25MAR15    | 428                | N                 | N                      | N                | N                     | Negative                           | Positive                                           | Negative                             |
| 7      | 7            | 06MAR15    | 481                | N                 | N                      | N                | N                     | Positive                           | Negative                                           | Negative                             |

DATA HAVE NOT BEEN VERIFIED

[1] Did not qualify for BRD re-treatment, not a BRD mortality and not removed for non-BRD reasons

PHASE IV ALL SPECIES STUDY BOVINE  
 STUDY: A131R-US-13-231  
 TREATMENT SUCCESS RATE  
 SUMMARY BY ANIMAL

treatment=T01 test material=DRAXXIN period=First Pull

| animal | Infectious<br>Bovine<br>Rhinotracheitis<br>(qPCR-IBR-BHV) | day<br>of<br>BRD | score | temperature<br>(F) | day of<br>removal | brd<br>related | BRD<br>mortality | treatment<br>success<br>[1] |
|--------|-----------------------------------------------------------|------------------|-------|--------------------|-------------------|----------------|------------------|-----------------------------|
| 585    | Negative                                                  |                  |       |                    | 27                | BRD            |                  | NO                          |
| 595    | Negative                                                  |                  |       |                    |                   |                |                  | YES                         |
| 601    | Negative                                                  |                  |       |                    | 31                | BRD            |                  | NO                          |
| 603    | Negative                                                  |                  |       |                    | 19                | BRD            |                  | NO                          |
| 615    | Negative                                                  |                  |       |                    | 16                | BRD            |                  | NO                          |
| 617    | Negative                                                  |                  |       |                    |                   |                |                  | YES                         |
| 618    | Negative                                                  |                  |       |                    |                   |                |                  | YES                         |
| 619    | Negative                                                  |                  |       |                    | 24                | BRD            |                  | NO                          |
| 62     | Negative                                                  |                  |       |                    |                   |                |                  | YES                         |
| 622    | Negative                                                  |                  |       |                    |                   |                |                  | YES                         |
| 625    | Negative                                                  |                  |       |                    |                   |                |                  | YES                         |
| 626    | Negative                                                  |                  |       |                    |                   |                |                  | YES                         |
| 630    | Negative                                                  |                  |       |                    |                   |                |                  | YES                         |
| 631    | Negative                                                  |                  |       |                    | 14                | BRD            |                  | NO                          |
| 636    | Negative                                                  |                  |       |                    |                   |                |                  | YES                         |
| 64     | Negative                                                  |                  |       |                    |                   |                |                  | YES                         |
| 644    | Negative                                                  | 22               | 1     | 103.7              | 22                | BRD            |                  | NO                          |
| 645    | Negative                                                  |                  |       |                    |                   |                |                  | YES                         |
| 65     | Positive                                                  |                  |       |                    | 17                | BRD            |                  | NO                          |
| 651    | Negative                                                  |                  |       |                    |                   |                |                  | YES                         |
| 653    | Negative                                                  |                  |       |                    | 20                | BRD            |                  | NO                          |
| 654    | Negative                                                  |                  |       |                    | 16                | BRD            |                  | NO                          |
| 656    | Negative                                                  |                  |       |                    | 35                | BRD            |                  | NO                          |
| 66     | Negative                                                  |                  |       |                    | 9                 | BRD            |                  | NO                          |
| 665    | Negative                                                  |                  |       |                    |                   |                |                  | YES                         |
| 675    | Negative                                                  |                  |       |                    |                   |                |                  | YES                         |
| 680    | Negative                                                  |                  |       |                    |                   |                |                  | YES                         |
| 69     | Negative                                                  |                  |       |                    | 18                | BRD            |                  | NO                          |
| 692    | Negative                                                  |                  |       |                    |                   |                |                  | YES                         |
| 693    | Negative                                                  | 22               | 2     | 103.7              | 22                | BRD            |                  | NO                          |
| 695    | Negative                                                  |                  |       |                    |                   |                |                  | YES                         |
| 7      | Negative                                                  |                  |       |                    |                   |                |                  | YES                         |

DATA HAVE NOT BEEN VERIFIED

[1] Did not qualify for BRD re-treatment, not a BRD mortality and not removed for non-BRD reasons

PHASE IV ALL SPECIES STUDY BOVINE  
 STUDY: A131R-US-13-231  
 TREATMENT SUCCESS RATE  
 SUMMARY BY ANIMAL

treatment=T01 test material=DRAXXIN period=First Pull

| animal | day of study | day 0 date | day 0 weight (LBS) | histophilus somni | mannheimia haemolytica | mycoplasma bovis | pasteurella multocida | Bovine Parainfluenza 3 (qPCR-BPI3) | Bovine Respiratory Syncytial Virus (qPCR-BRSV-PCR) | Bovine Viral Diarrhea (qPCR-BVD-PCR) |
|--------|--------------|------------|--------------------|-------------------|------------------------|------------------|-----------------------|------------------------------------|----------------------------------------------------|--------------------------------------|
| 70     | 10           | 06MAR15    | 540                | N                 | N                      | N                | N                     | Positive                           | Negative                                           | Negative                             |
| 705    | 22           | 25MAR15    | 400                | N                 | N                      | N                | N                     | Negative                           | Negative                                           | Negative                             |
| 706    | 15           | 25MAR15    | 424                | N                 | Y                      | N                | N                     | Negative                           | Negative                                           | Negative                             |
| 708    | 16           | 25MAR15    | 407                | N                 | Y                      | N                | N                     | Negative                           | Positive                                           | Negative                             |
| 712    | 22           | 25MAR15    | 355                | N                 | Y                      | N                | N                     | Negative                           | Negative                                           | Negative                             |
| 713    | 15           | 25MAR15    | 409                | N                 | Y                      | N                | N                     | Negative                           | Positive                                           | Negative                             |
| 72     | 11           | 06MAR15    | 484                | N                 | N                      | N                | N                     | Positive                           | Positive                                           | Positive                             |
| 721    | 15           | 25MAR15    | 412                | N                 | Y                      | N                | N                     | Negative                           | Negative                                           | Negative                             |
| 724    | 35           | 25MAR15    | 380                | Y                 | N                      | N                | N                     | Negative                           | Negative                                           | Negative                             |
| 728    | 12           | 25MAR15    | 394                | Y                 | N                      | P                | N                     | Negative                           | Positive                                           | Negative                             |
| 73     | 12           | 06MAR15    | 508                | N                 | N                      | N                | N                     | Negative                           | Negative                                           | Positive                             |
| 737    | 14           | 25MAR15    | 340                | N                 | Y                      | N                | N                     | Positive                           | Positive                                           | Negative                             |
| 74     | 7            | 06MAR15    | 420                | N                 | N                      | N                | N                     | Positive                           | Negative                                           | Positive                             |
| 745    | 14           | 25MAR15    | 450                | N                 | Y                      | N                | N                     | Positive                           | Positive                                           | Negative                             |
| 748    | 14           | 25MAR15    | 434                | N                 | N                      | N                | N                     | Positive                           | Positive                                           | Negative                             |
| 752    | 14           | 25MAR15    | 434                | N                 | Y                      | P                | N                     | Positive                           | Positive                                           | Negative                             |
| 753    | 9            | 25MAR15    | 404                | N                 | Y                      | N                | N                     | Negative                           | Negative                                           | Negative                             |
| 754    | 18           | 25MAR15    | 349                | N                 | Y                      | P                | N                     | Negative                           | Negative                                           | Negative                             |
| 760    | 13           | 26MAR15    | 511                | N                 | N                      | N                | N                     | Positive                           | Positive                                           | Negative                             |
| 765    | 13           | 26MAR15    | 504                | N                 | N                      | P                | N                     | Positive                           | Positive                                           | Negative                             |
| 766    | 18           | 26MAR15    | 485                | N                 | Y                      | N                | N                     | Positive                           | Negative                                           | Negative                             |
| 769    | 30           | 26MAR15    | 475                | N                 | N                      | P                | N                     | Negative                           | Negative                                           | Positive                             |
| 771    | 10           | 26MAR15    | 492                | N                 | N                      | N                | N                     | Negative                           | Positive                                           | Negative                             |
| 772    | 18           | 26MAR15    | 558                | Y                 | Y                      | P                | N                     | Positive                           | Negative                                           | Negative                             |
| 773    | 10           | 26MAR15    | 454                | N                 | Y                      | N                | N                     | Negative                           | Negative                                           | Positive                             |
| 775    | 8            | 26MAR15    | 466                | N                 | Y                      | N                | N                     | Negative                           | Positive                                           | Positive                             |
| 779    | 13           | 26MAR15    | 467                | N                 | N                      | N                | N                     | Positive                           | Positive                                           | Negative                             |
| 783    | 14           | 26MAR15    | 505                | N                 | Y                      | P                | N                     | Negative                           | Positive                                           | Negative                             |
| 786    | 17           | 26MAR15    | 499                | N                 | Y                      | P                | N                     | Negative                           | Negative                                           | Negative                             |
| 792    | 10           | 26MAR15    | 507                | N                 | N                      | N                | N                     | Negative                           | Positive                                           | Positive                             |
| 793    | 9            | 26MAR15    | 532                | N                 | Y                      | N                | N                     | Negative                           | Positive                                           | Positive                             |
| 795    | 16           | 26MAR15    | 535                | N                 | Y                      | N                | N                     | Negative                           | Negative                                           | Positive                             |

DATA HAVE NOT BEEN VERIFIED

[1] Did not qualify for BRD re-treatment, not a BRD mortality and not removed for non-BRD reasons

PHASE IV ALL SPECIES STUDY BOVINE  
 STUDY: A131R-US-13-231  
 TREATMENT SUCCESS RATE  
 SUMMARY BY ANIMAL

treatment=T01 test material=DRAXXIN period=First Pull

| animal | Infectious<br>Bovine<br>Rhinotracheitis<br>(qPCR-IBR-BHV) | day<br>of<br>BRD | score | temperature<br>(F) | day of<br>removal | brd<br>related | BRD<br>mortality | treatment<br>success<br>[1] |
|--------|-----------------------------------------------------------|------------------|-------|--------------------|-------------------|----------------|------------------|-----------------------------|
| 70     | Negative                                                  |                  |       |                    |                   |                |                  | YES                         |
| 705    | Negative                                                  |                  |       |                    |                   |                |                  | YES                         |
| 706    | Negative                                                  | 22               | 3     | 106.8              | 22                | BRD            |                  | NO                          |
| 708    | Negative                                                  |                  |       |                    |                   |                |                  | YES                         |
| 712    | Negative                                                  |                  |       |                    |                   |                |                  | YES                         |
| 713    | Negative                                                  | 22               | 1     | 105.4              | 22                | BRD            |                  | NO                          |
| 72     | Negative                                                  |                  |       |                    | 17                | BRD            |                  | NO                          |
| 721    | Negative                                                  | 22               | 2     | 105.0              | 22                | BRD            |                  | NO                          |
| 724    | Negative                                                  |                  |       |                    |                   |                |                  | YES                         |
| 728    | Positive                                                  |                  |       |                    | 21                | BRD            |                  | NO                          |
| 73     | Positive                                                  |                  |       |                    | 19                | BRD            |                  | NO                          |
| 737    | Negative                                                  |                  |       |                    |                   |                |                  | YES                         |
| 74     | Negative                                                  |                  |       |                    |                   |                |                  | YES                         |
| 745    | Negative                                                  |                  |       |                    |                   |                |                  | YES                         |
| 748    | Negative                                                  |                  |       |                    |                   |                |                  | YES                         |
| 752    | Negative                                                  | 24               | 1     | 103.7              | 24                | BRD            |                  | NO                          |
| 753    | Negative                                                  |                  |       |                    |                   |                |                  | YES                         |
| 754    | Negative                                                  |                  |       |                    |                   |                |                  | YES                         |
| 760    | Negative                                                  |                  |       |                    | 34                | BRD            |                  | NO                          |
| 765    | Negative                                                  |                  |       |                    |                   |                |                  | YES                         |
| 766    | Negative                                                  |                  |       |                    |                   |                |                  | YES                         |
| 769    | Negative                                                  |                  |       |                    |                   |                |                  | YES                         |
| 771    | Negative                                                  |                  |       |                    |                   |                |                  | YES                         |
| 772    | Negative                                                  | 25               | 2     | 103.8              | 25                | BRD            |                  | NO                          |
| 773    | Positive                                                  |                  |       |                    |                   |                |                  | YES                         |
| 775    | Negative                                                  | 12               | 3     | 106.0              | 12                | BRD            |                  | NO                          |
| 779    | Negative                                                  |                  |       |                    | 20                | BRD            |                  | NO                          |
| 783    | Negative                                                  | 21               | 1     | 106.0              | 21                | BRD            |                  | NO                          |
| 786    | Negative                                                  | 33               | 2     | 103.2              | 33                | BRD            |                  | NO                          |
| 792    | Negative                                                  |                  |       |                    | 15                | BRD            |                  | NO                          |
| 793    | Negative                                                  |                  |       |                    |                   |                |                  | YES                         |
| 795    | Negative                                                  |                  |       |                    |                   |                |                  | YES                         |

DATA HAVE NOT BEEN VERIFIED

[1] Did not qualify for BRD re-treatment, not a BRD mortality and not removed for non-BRD reasons

PHASE IV ALL SPECIES STUDY BOVINE  
 STUDY: A131R-US-13-231  
 TREATMENT SUCCESS RATE  
 SUMMARY BY ANIMAL

treatment=T01 test material=DRAXXIN period=First Pull

| animal | day of study | day 0 date | day 0 weight (LBS) | histophilus sommi | mannheimia haemolytica | mycoplasma bovis | pasteurella multocida | Bovine Parainfluenza 3 (qPCR-BPI3) | Bovine Respiratory Syncytial Virus (qPCR-BRSV-PCR) | Bovine Viral Diarrhea (qPCR-BVD-PCR) |
|--------|--------------|------------|--------------------|-------------------|------------------------|------------------|-----------------------|------------------------------------|----------------------------------------------------|--------------------------------------|
| 798    | 8            | 26MAR15    | 545                | N                 | Y                      | N                | Y                     | Negative                           | Positive                                           | Negative                             |
| 799    | 11           | 26MAR15    | 500                | N                 | N                      | P                | N                     | Positive                           | Positive                                           | Positive                             |
| 80     | 7            | 06MAR15    | 497                | N                 | N                      | N                | N                     | Negative                           | Negative                                           | Positive                             |
| 800    | 12           | 26MAR15    | 510                | N                 | Y                      | N                | N                     | Positive                           | Negative                                           | Negative                             |
| 805    | 9            | 26MAR15    | 474                |                   |                        |                  |                       | Negative                           | Positive                                           | Negative                             |
| 806    | 11           | 26MAR15    | 482                | N                 | N                      | N                | N                     | Negative                           | Negative                                           | Negative                             |
| 807    | 7            | 26MAR15    | 520                | N                 | N                      | N                | N                     | Positive                           | Positive                                           | Negative                             |
| 809    | 13           | 26MAR15    | 513                | Y                 | N                      | N                | N                     | Negative                           | Negative                                           | Negative                             |
| 814    | 26           | 26MAR15    | 500                | Y                 | N                      | P                | N                     | Negative                           | Negative                                           | Negative                             |
| 815    | 7            | 26MAR15    | 515                | N                 | N                      | N                | N                     | Negative                           | Positive                                           | Negative                             |
| 818    | 8            | 26MAR15    | 450                | Y                 | N                      | N                | N                     | Negative                           | Negative                                           | Positive                             |
| 819    | 8            | 26MAR15    | 423                | N                 | N                      | N                | N                     | Negative                           | Negative                                           | Negative                             |
| 824    | 8            | 26MAR15    | 474                | N                 | N                      | N                | N                     | Negative                           | Positive                                           | Negative                             |
| 829    | 13           | 26MAR15    | 493                | N                 | N                      | N                | N                     | Positive                           | Positive                                           | Positive                             |
| 83     | 11           | 06MAR15    | 540                | N                 | N                      | Y                | N                     | Negative                           | Negative                                           | Positive                             |
| 832    | 13           | 26MAR15    | 446                | N                 | N                      | N                | N                     | Positive                           | Positive                                           | Positive                             |
| 834    | 7            | 26MAR15    | 520                | N                 | N                      | N                | N                     | Positive                           | Negative                                           | Positive                             |
| 836    | 19           | 26MAR15    | 443                | N                 | Y                      | P                | N                     | Negative                           | Negative                                           | Negative                             |
| 838    | 14           | 26MAR15    | 501                | N                 | Y                      | N                | N                     | Negative                           | Positive                                           | Negative                             |
| 842    | 12           | 26MAR15    | 442                | N                 | Y                      | N                | N                     | Positive                           | Positive                                           | Negative                             |
| 852    | 12           | 27MAR15    | 515                | N                 | N                      | P                | N                     | Positive                           | Positive                                           | Negative                             |
| 853    | 15           | 27MAR15    | 528                | N                 | N                      | N                | N                     | Negative                           | Positive                                           | Negative                             |
| 854    | 7            | 27MAR15    | 539                | N                 | N                      | N                | N                     | Positive                           | Negative                                           | Negative                             |
| 855    | 32           | 27MAR15    | 522                | N                 | Y                      | N                | Y                     | Negative                           | Negative                                           | Negative                             |
| 856    | 7            | 27MAR15    | 530                | N                 | Y                      | N                | N                     | Negative                           | Negative                                           | Negative                             |
| 86     | 13           | 06MAR15    | 418                | N                 | N                      | N                | N                     | Positive                           | Positive                                           | Positive                             |
| 865    | 11           | 27MAR15    | 464                | N                 | N                      | N                | N                     | Positive                           | Positive                                           | Negative                             |
| 867    | 9            | 27MAR15    | 523                | N                 | N                      | N                | N                     | Positive                           | Positive                                           | Positive                             |
| 868    | 7            | 27MAR15    | 560                | N                 | Y                      | P                | N                     | Negative                           | Negative                                           | Positive                             |
| 87     | 19           | 06MAR15    | 444                | N                 | Y                      | Y                | N                     | Negative                           | Negative                                           | Positive                             |
| 872    | 7            | 27MAR15    | 534                | N                 | Y                      | N                | N                     | Positive                           | Negative                                           | Negative                             |
| 873    | 10           | 27MAR15    | 538                | N                 | Y                      | P                | N                     | Negative                           | Positive                                           | Positive                             |

DATA HAVE NOT BEEN VERIFIED

[1] Did not qualify for BRD re-treatment, not a BRD mortality and not removed for non-BRD reasons

PHASE IV ALL SPECIES STUDY BOVINE  
 STUDY: A131R-US-13-231  
 TREATMENT SUCCESS RATE  
 SUMMARY BY ANIMAL

treatment=T01 test material=DRAXXIN period=First Pull

| animal | Infectious<br>Bovine<br>Rhinotracheitis<br>(qPCR-IBR-BHV) | day<br>of<br>BRD | score | temperature<br>(F) | day of<br>removal | brd<br>related | BRD<br>mortality | treatment<br>success<br>[1] |
|--------|-----------------------------------------------------------|------------------|-------|--------------------|-------------------|----------------|------------------|-----------------------------|
| 798    | Positive                                                  | 24               | 1     | 103.6              | 24                | BRD            |                  | NO                          |
| 799    | Positive                                                  |                  |       |                    | 18                | BRD            |                  | NO                          |
| 80     | Negative                                                  |                  |       |                    | 12                | BRD            |                  | NO                          |
| 800    | Negative                                                  |                  |       |                    |                   |                |                  | YES                         |
| 805    | Negative                                                  |                  |       |                    | 21                | BRD            |                  | NO                          |
| 806    | Positive                                                  |                  |       |                    | 19                | BRD            |                  | NO                          |
| 807    | Negative                                                  |                  |       |                    | 14                | BRD            |                  | NO                          |
| 809    | Negative                                                  |                  |       |                    | 17                | BRD            |                  | NO                          |
| 814    | Negative                                                  |                  |       |                    | 33                | BRD            |                  | NO                          |
| 815    | Negative                                                  |                  |       |                    | 14                | BRD            |                  | NO                          |
| 818    | Negative                                                  |                  |       |                    | 13                | BRD            |                  | NO                          |
| 819    | Negative                                                  |                  |       |                    | 17                | BRD            |                  | NO                          |
| 824    | Negative                                                  |                  |       |                    | 19                | BRD            |                  | NO                          |
| 829    | Negative                                                  |                  |       |                    | 15                | BRD            |                  | NO                          |
| 83     | Negative                                                  |                  |       |                    |                   |                |                  | YES                         |
| 832    | Negative                                                  |                  |       |                    | 21                | BRD            |                  | NO                          |
| 834    | Negative                                                  |                  |       |                    |                   |                |                  | YES                         |
| 836    | Negative                                                  | 28               | 2     | 105.2              | 28                | BRD            |                  | NO                          |
| 838    | Positive                                                  | 21               | 1     | 103.7              | 21                | BRD            |                  | NO                          |
| 842    | Negative                                                  |                  |       |                    |                   |                |                  | YES                         |
| 852    | Negative                                                  |                  |       |                    | 33                | BRD            |                  | NO                          |
| 853    | Negative                                                  |                  |       |                    |                   |                |                  | YES                         |
| 854    | Positive                                                  |                  |       |                    |                   |                |                  | YES                         |
| 855    | Negative                                                  |                  |       |                    |                   |                |                  | YES                         |
| 856    | Negative                                                  |                  |       |                    |                   |                |                  | YES                         |
| 86     | Negative                                                  |                  |       |                    | 19                | BRD            |                  | NO                          |
| 865    | Negative                                                  |                  |       |                    | 18                | BRD            |                  | NO                          |
| 867    | Negative                                                  |                  |       |                    | 14                | BRD            |                  | NO                          |
| 868    | Negative                                                  | 10               | 4     | 104.8              | 10                | BRD            | YES              | NO                          |
| 87     | Negative                                                  |                  |       |                    |                   |                |                  | YES                         |
| 872    | Negative                                                  |                  |       |                    |                   |                |                  | YES                         |
| 873    | Negative                                                  | 12               | 3     | 106.9              | 12                | BRD            |                  | NO                          |

DATA HAVE NOT BEEN VERIFIED

[1] Did not qualify for BRD re-treatment, not a BRD mortality and not removed for non-BRD reasons

PHASE IV ALL SPECIES STUDY BOVINE  
 STUDY: A131R-US-13-231  
 TREATMENT SUCCESS RATE  
 SUMMARY BY ANIMAL

treatment=T01 test material=DRAXXIN period=First Pull

| animal | day of study | day 0 date | day 0 weight (LBS) | histophilus sommi | mannheimia haemolytica | mycoplasma bovis | pasteurella multocida | Bovine Parainfluenza 3 (qPCR-BPI3) | Bovine Respiratory Syncytial Virus (qPCR-BRSV-PCR) | Bovine Viral Diarrhea (qPCR-BVD-PCR) |
|--------|--------------|------------|--------------------|-------------------|------------------------|------------------|-----------------------|------------------------------------|----------------------------------------------------|--------------------------------------|
| 874    | 7            | 27MAR15    | 563                | N                 | Y                      | P                | N                     | Positive                           | Positive                                           | Negative                             |
| 876    | 25           | 27MAR15    | 538                | N                 | Y                      | P                | Y                     | Negative                           | Negative                                           | Negative                             |
| 877    | 9            | 27MAR15    | 542                | N                 | Y                      | N                | N                     | Positive                           | Positive                                           | Negative                             |
| 878    | 18           | 27MAR15    | 475                | N                 | N                      | N                | Y                     | Negative                           | Negative                                           | Negative                             |
| 88     | 18           | 06MAR15    | 479                | N                 | Y                      | Y                | N                     | Positive                           | Positive                                           | Positive                             |
| 888    | 12           | 27MAR15    | 483                | N                 | Y                      | N                | N                     | Positive                           | Positive                                           | Positive                             |
| 89     | 7            | 06MAR15    | 479                | N                 | N                      | N                | N                     | Negative                           | Negative                                           | Negative                             |
| 893    | 26           | 27MAR15    | 554                | Y                 | Y                      | P                | N                     | Negative                           | Negative                                           | Negative                             |
| 894    | 25           | 27MAR15    | 538                | Y                 | N                      | P                | N                     | Negative                           | Negative                                           | Negative                             |
| 895    | 40           | 27MAR15    | 486                |                   |                        |                  |                       | Negative                           | Positive                                           | Negative                             |
| 896    | 32           | 27MAR15    | 582                | N                 | N                      | N                | Y                     | Negative                           | Negative                                           | Negative                             |
| 898    | 8            | 27MAR15    | 519                | N                 | Y                      | N                | N                     | Negative                           | Positive                                           | Negative                             |
| 9      | 7            | 06MAR15    | 526                | N                 | N                      | N                | N                     | Negative                           | Negative                                           | Positive                             |
| 901    | 10           | 27MAR15    | 548                | N                 | N                      | N                | N                     | Negative                           | Negative                                           | Positive                             |
| 904    | 11           | 27MAR15    | 528                | N                 | N                      | N                | N                     | Negative                           | Negative                                           | Positive                             |
| 907    | 33           | 27MAR15    | 575                | Y                 | N                      | P                | Y                     | Negative                           | Negative                                           | Negative                             |
| 912    | 10           | 27MAR15    | 506                | N                 | N                      | N                | N                     | Negative                           | Positive                                           | Positive                             |
| 915    | 20           | 27MAR15    | 441                | N                 | Y                      | N                | N                     | Negative                           | Negative                                           | Negative                             |
| 917    | 27           | 27MAR15    | 525                | N                 | N                      | N                | N                     | Positive                           | Positive                                           | Negative                             |
| 918    | 12           | 27MAR15    | 558                | N                 | N                      | N                | N                     | Positive                           | Positive                                           | Negative                             |
| 922    | 12           | 27MAR15    | 477                | N                 | N                      | N                | N                     | Positive                           | Positive                                           | Negative                             |
| 931    | 29           | 27MAR15    | 510                | Y                 | Y                      | P                | N                     | Negative                           | Negative                                           | Negative                             |
| 932    | 9            | 27MAR15    | 540                | N                 | N                      | N                | N                     | Negative                           | Positive                                           | Negative                             |
| 934    | 11           | 27MAR15    | 518                | N                 | Y                      | N                | N                     | Positive                           | Positive                                           | Negative                             |
| 942    | 11           | 28MAR15    | 449                | N                 | Y                      | N                | Y                     | Positive                           | Positive                                           | Negative                             |
| 944    | 11           | 28MAR15    | 440                | N                 | Y                      | N                | N                     | Positive                           | Positive                                           | Positive                             |
| 945    | 13           | 28MAR15    | 470                | N                 | N                      | N                | N                     | Negative                           | Negative                                           | Positive                             |
| 946    | 39           | 28MAR15    | 539                |                   |                        |                  |                       | Negative                           | Negative                                           | Negative                             |
| 947    | 11           | 28MAR15    | 477                | N                 | N                      | N                | N                     | Positive                           | Positive                                           | Negative                             |
| 949    | 11           | 28MAR15    | 433                | N                 | N                      | N                | N                     | Negative                           | Positive                                           | Positive                             |
| 950    | 12           | 28MAR15    | 454                | N                 | Y                      | P                | N                     | Negative                           | Negative                                           | Negative                             |
| 951    | 11           | 28MAR15    | 448                | N                 | Y                      | P                | N                     | Positive                           | Positive                                           | Negative                             |

DATA HAVE NOT BEEN VERIFIED

[1] Did not qualify for BRD re-treatment, not a BRD mortality and not removed for non-BRD reasons

PHASE IV ALL SPECIES STUDY BOVINE  
 STUDY: A131R-US-13-231  
 TREATMENT SUCCESS RATE  
 SUMMARY BY ANIMAL

treatment=T01 test material=DRAXXIN period=First Pull

| animal | Infectious<br>Bovine<br>Rhinotracheitis<br>(qPCR-IBR-BHV) | day<br>of<br>BRD | score | temperature<br>(F) | day of<br>removal | brd<br>related | BRD<br>mortality | treatment<br>success<br>[1] |
|--------|-----------------------------------------------------------|------------------|-------|--------------------|-------------------|----------------|------------------|-----------------------------|
| 874    | Negative                                                  | 10               | 3     | 105.9              | 10                | BRD            |                  | NO                          |
| 876    | Negative                                                  | 40               | 1     | 104.2              | 40                | BRD            |                  | NO                          |
| 877    | Negative                                                  | 19               | 1     | 105.3              | 19                | BRD            |                  | NO                          |
| 878    | Negative                                                  |                  |       |                    |                   |                |                  | YES                         |
| 88     | Positive                                                  | 20               | 3     | 101.7              | 20                | BRD            |                  | NO                          |
| 888    | Negative                                                  | 19               | 2     | 106.7              | 19                | BRD            |                  | NO                          |
| 89     | Negative                                                  |                  |       |                    |                   |                |                  | YES                         |
| 893    | Negative                                                  | 33               | 1     | 103.6              | 33                | BRD            |                  | NO                          |
| 894    | Negative                                                  |                  |       |                    | 37                | BRD            |                  | NO                          |
| 895    | Negative                                                  |                  |       |                    |                   |                |                  | YES                         |
| 896    | Negative                                                  | 40               | 1     | 103.5              | 40                | BRD            |                  | NO                          |
| 898    | Negative                                                  |                  |       |                    |                   |                |                  | YES                         |
| 9      | Negative                                                  |                  |       |                    | 17                | BRD            |                  | NO                          |
| 901    | Negative                                                  |                  |       |                    |                   |                |                  | YES                         |
| 904    | Negative                                                  |                  |       |                    | 17                | BRD            |                  | NO                          |
| 907    | Negative                                                  |                  |       |                    |                   |                |                  | YES                         |
| 912    | Negative                                                  |                  |       |                    | 18                | BRD            |                  | NO                          |
| 915    | Negative                                                  | 37               | 1     | 104.9              | 37                | BRD            |                  | NO                          |
| 917    | Negative                                                  |                  |       |                    |                   |                |                  | YES                         |
| 918    | Negative                                                  |                  |       |                    | 21                | BRD            |                  | NO                          |
| 922    | Negative                                                  |                  |       |                    | 14                | BRD            |                  | NO                          |
| 931    | Negative                                                  |                  |       |                    |                   |                |                  | YES                         |
| 932    | Negative                                                  |                  |       |                    | 23                | BRD            |                  | NO                          |
| 934    | Negative                                                  |                  |       |                    |                   |                |                  | YES                         |
| 942    | Positive                                                  | 13               | 3     | 105.8              | 13                | BRD            |                  | NO                          |
| 944    | Negative                                                  |                  |       |                    |                   |                |                  | YES                         |
| 945    | Negative                                                  |                  |       |                    |                   |                |                  | YES                         |
| 946    | Negative                                                  |                  |       |                    |                   |                |                  | YES                         |
| 947    | Negative                                                  |                  |       |                    | 13                | BRD            |                  | NO                          |
| 949    | Negative                                                  |                  |       |                    | 20                | BRD            |                  | NO                          |
| 950    | Negative                                                  | 19               | 1     | 104.8              | 19                | BRD            |                  | NO                          |
| 951    | Negative                                                  | 21               | 3     | 106.4              | 21                | BRD            |                  | NO                          |

DATA HAVE NOT BEEN VERIFIED

[1] Did not qualify for BRD re-treatment, not a BRD mortality and not removed for non-BRD reasons



PHASE IV ALL SPECIES STUDY BOVINE  
 STUDY: A131R-US-13-231  
 TREATMENT SUCCESS RATE  
 SUMMARY BY ANIMAL

treatment=T01 test material=DRAXXIN period=First Pull

| animal | day of study | day 0 date | day 0 weight (LBS) | histophilus somni | mannheimia haemolytica | mycoplasma bovis | pasteurella multocida | Bovine Parainfluenza 3 (qPCR-BPI3) | Bovine Respiratory Syncytial Virus (qPCR-BRSV-PCR) | Bovine Viral Diarrhea (qPCR-BVD-PCR) |
|--------|--------------|------------|--------------------|-------------------|------------------------|------------------|-----------------------|------------------------------------|----------------------------------------------------|--------------------------------------|
| 953    | 7            | 28MAR15    | 488                | N                 | Y                      | N                | N                     | Negative                           | Positive                                           | Negative                             |
| 956    | 12           | 28MAR15    | 509                | N                 | Y                      | P                | N                     | Negative                           | Negative                                           | Positive                             |
| 958    | 10           | 28MAR15    | 456                | N                 | N                      | N                | N                     | Negative                           | Positive                                           | Positive                             |
| 962    | 17           | 28MAR15    | 446                | N                 | Y                      | P                | N                     | Negative                           | Negative                                           | Negative                             |
| 964    | 31           | 28MAR15    | 438                | N                 | Y                      | P                | N                     | Negative                           | Negative                                           | Negative                             |
| 97     | 7            | 13MAR15    | 515                | N                 | N                      | N                | N                     | Positive                           | Positive                                           | Negative                             |
| 970    | 37           | 28MAR15    | 465                | N                 | Y                      |                  | Y                     | Negative                           | Positive                                           | Negative                             |
| 972    | 17           | 28MAR15    | 489                | N                 | Y                      | P                | N                     | Negative                           | Negative                                           | Negative                             |
| 973    | 14           | 28MAR15    | 417                | N                 | Y                      | N                | N                     | Positive                           | Positive                                           | Positive                             |
| 975    | 9            | 28MAR15    | 507                | N                 | N                      | P                | N                     |                                    |                                                    |                                      |
| 98     | 10           | 13MAR15    | 533                | N                 | Y                      | Y                | N                     | Positive                           | Positive                                           | Positive                             |
| 982    | 8            | 28MAR15    | 513                | N                 | N                      | N                | N                     | Negative                           | Negative                                           | Negative                             |
| 983    | 16           | 28MAR15    | 475                | N                 | Y                      | N                | N                     | Negative                           | Negative                                           | Negative                             |
| 987    | 21           | 28MAR15    | 431                | N                 | Y                      | N                | N                     | Negative                           | Positive                                           | Negative                             |
| 989    | 8            | 28MAR15    | 382                | N                 | Y                      | N                | N                     | Negative                           | Positive                                           | Negative                             |
| 990    | 16           | 28MAR15    | 516                | N                 | N                      | N                | N                     | Negative                           | Negative                                           | Negative                             |
| 996    | 10           | 28MAR15    | 536                | N                 | Y                      | P                | N                     | Negative                           | Positive                                           | Positive                             |
| 999    | 12           | 28MAR15    | 484                | N                 | N                      | N                | N                     | Negative                           | Negative                                           | Negative                             |

DATA HAVE NOT BEEN VERIFIED

[1] Did not qualify for BRD re-treatment, not a BRD mortality and not removed for non-BRD reasons

PHASE IV ALL SPECIES STUDY BOVINE  
 STUDY: A131R-US-13-231  
 TREATMENT SUCCESS RATE  
 SUMMARY BY ANIMAL

treatment=T01 test material=DRAXXIN period=First Pull

| animal | Infectious<br>Bovine<br>Rhinotracheitis<br>(qPCR-IBR-BHV) | day<br>of<br>BRD | score | temperature<br>(F) | day of<br>removal | brd<br>related | BRD<br>mortality | treatment<br>success<br>[1] |
|--------|-----------------------------------------------------------|------------------|-------|--------------------|-------------------|----------------|------------------|-----------------------------|
| 953    | Positive                                                  | 18               | 2     | 104.5              | 18                | BRD            |                  | NO                          |
| 956    | Negative                                                  | 15               | 3     | 107.4              | 15                | BRD            |                  | NO                          |
| 958    | Negative                                                  |                  |       |                    | 19                | BRD            |                  | NO                          |
| 962    | Negative                                                  |                  |       |                    |                   |                |                  | YES                         |
| 964    | Negative                                                  |                  |       |                    |                   |                |                  | YES                         |
| 97     | Negative                                                  |                  |       |                    |                   |                |                  | YES                         |
| 970    | Negative                                                  |                  |       |                    |                   |                |                  | YES                         |
| 972    | Negative                                                  | 27               | 2     | 104.8              | 27                | BRD            |                  | NO                          |
| 973    | Negative                                                  | 21               | 2     | 104.7              | 21                | BRD            |                  | NO                          |
| 975    |                                                           |                  |       |                    | 16                | BRD            |                  | NO                          |
| 98     | Positive                                                  | 17               | 1     | 105.3              | 17                | BRD            |                  | NO                          |
| 982    | Negative                                                  |                  |       |                    | 12                | BRD            |                  | NO                          |
| 983    | Negative                                                  |                  |       |                    |                   |                |                  | YES                         |
| 987    | Negative                                                  |                  |       |                    |                   |                |                  | YES                         |
| 989    | Negative                                                  | 13               | 3     | 105.2              | 13                | BRD            |                  | NO                          |
| 990    | Negative                                                  |                  |       |                    | 18                | BRD            |                  | NO                          |
| 996    | Negative                                                  |                  |       |                    |                   |                |                  | YES                         |
| 999    | Negative                                                  |                  |       |                    | 19                | BRD            |                  | NO                          |

DATA HAVE NOT BEEN VERIFIED

[1] Did not qualify for BRD re-treatment, not a BRD mortality and not removed for non-BRD reasons

PHASE IV ALL SPECIES STUDY BOVINE  
 STUDY: A131R-US-13-231  
 TREATMENT SUCCESS RATE  
 SUMMARY OF BACTERIAL ISOLATES

treatment=T01 test material=DRAXXIN

|            | histophilus somni |      |    |     | ALL  |
|------------|-------------------|------|----|-----|------|
|            | N                 |      | Y  |     |      |
|            | n                 | %    | n  | %   | n    |
| period     |                   |      |    |     |      |
| Arrival    | 1019              | 99.4 | 6  | 0.6 | 1025 |
| First Pull | 369               | 93.7 | 25 | 6.3 | 394  |

PHASE IV ALL SPECIES STUDY BOVINE  
 STUDY: A131R-US-13-231  
 TREATMENT SUCCESS RATE  
 SUMMARY OF BACTERIAL ISOLATES

treatment=T01 test material=DRAXXIN

|            | mannheimia haemolytica |      |     |      | ALL  |
|------------|------------------------|------|-----|------|------|
|            | N                      |      | Y   |      |      |
|            | n                      | %    | n   | %    | n    |
| period     |                        |      |     |      |      |
| Arrival    | 913                    | 89.1 | 112 | 10.9 | 1025 |
| First Pull | 260                    | 66.0 | 134 | 34.0 | 394  |

PHASE IV ALL SPECIES STUDY BOVINE  
 STUDY: A131R-US-13-231  
 TREATMENT SUCCESS RATE  
 SUMMARY OF BACTERIAL ISOLATES

treatment=T01 test material=DRAXXIN

| period     | mycoplasma bovis |      |    |      |    |      | ALL<br>n |
|------------|------------------|------|----|------|----|------|----------|
|            | N                |      | P  |      | Y  |      |          |
|            | n                | %    | n  | %    | n  | %    |          |
| Arrival    | 1015             | 99.0 | 0  | 0    | 10 | 1.0  | 1025     |
| First Pull | 250              | 63.5 | 79 | 20.1 | 65 | 16.5 | 394      |

PHASE IV ALL SPECIES STUDY BOVINE  
 STUDY: A131R-US-13-231  
 TREATMENT SUCCESS RATE  
 SUMMARY OF BACTERIAL ISOLATES

treatment=T01 test material=DRAXXIN

|            | pasteurella multocida |      |     |      | ALL  |
|------------|-----------------------|------|-----|------|------|
|            | N                     |      | Y   |      |      |
|            | n                     | %    | n   | %    | n    |
| period     |                       |      |     |      |      |
| Arrival    | 918                   | 89.6 | 107 | 10.4 | 1025 |
| First Pull | 365                   | 92.6 | 29  | 7.4  | 394  |

**PHASE IV ALL SPECIES STUDY BOVINE**  
**STUDY: A131R-US-13-231**  
**TREATMENT SUCCESS RATE**  
**SUMMARY OF BACTERIAL ISOLATES BY TREATMENT SUCCESS**

treatment=T01 test material=DRAXXIN

|            |                   | treatment success |      |     |      | ALL  |
|------------|-------------------|-------------------|------|-----|------|------|
|            |                   | NO                |      | YES |      |      |
|            |                   | n                 | %    | n   | %    | n    |
| period     | histophilus somni |                   |      |     |      |      |
| Arrival    | N                 | 418               | 41.0 | 601 | 59.0 | 1019 |
|            | Y                 | 2                 | 33.3 | 4   | 66.7 | 6    |
|            | ALL               | 420               | 41.0 | 605 | 59.0 | 1025 |
| First Pull | histophilus somni |                   |      |     |      |      |
|            | N                 | 201               | 54.5 | 168 | 45.5 | 369  |
|            | Y                 | 15                | 60.0 | 10  | 40.0 | 25   |
|            | ALL               | 216               | 54.8 | 178 | 45.2 | 394  |

**PHASE IV ALL SPECIES STUDY BOVINE**  
**STUDY: A131R-US-13-231**  
**TREATMENT SUCCESS RATE**  
**SUMMARY OF BACTERIAL ISOLATES BY TREATMENT SUCCESS**

treatment=T01 test material=DRAXXIN

|            |                           | treatment success |      |     |      | ALL  |
|------------|---------------------------|-------------------|------|-----|------|------|
|            |                           | NO                |      | YES |      |      |
|            |                           | n                 | %    | n   | %    | n    |
| period     | mannheimia<br>haemolytica |                   |      |     |      |      |
| Arrival    | N                         | 365               | 40.0 | 548 | 60.0 | 913  |
|            | Y                         | 55                | 49.1 | 57  | 50.9 | 112  |
|            | ALL                       | 420               | 41.0 | 605 | 59.0 | 1025 |
| First Pull | mannheimia<br>haemolytica |                   |      |     |      |      |
|            | N                         | 148               | 56.9 | 112 | 43.1 | 260  |
|            | Y                         | 68                | 50.7 | 66  | 49.3 | 134  |
|            | ALL                       | 216               | 54.8 | 178 | 45.2 | 394  |



**PHASE IV ALL SPECIES STUDY BOVINE**  
**STUDY: A131R-US-13-231**  
**TREATMENT SUCCESS RATE**  
**SUMMARY OF BACTERIAL ISOLATES BY TREATMENT SUCCESS**

treatment=T01 test material=DRAXXIN

|            |                  | treatment success |      |     |      | ALL  |
|------------|------------------|-------------------|------|-----|------|------|
|            |                  | NO                |      | YES |      |      |
|            |                  | n                 | %    | n   | %    | n    |
| period     | mycoplasma bovis |                   |      |     |      |      |
| Arrival    | N                | 417               | 41.1 | 598 | 58.9 | 1015 |
|            | Y                | 3                 | 30.0 | 7   | 70.0 | 10   |
|            | ALL              | 420               | 41.0 | 605 | 59.0 | 1025 |
| First Pull | mycoplasma bovis |                   |      |     |      |      |
|            | N                | 133               | 53.2 | 117 | 46.8 | 250  |
|            | P                | 45                | 57.0 | 34  | 43.0 | 79   |
|            | Y                | 38                | 58.5 | 27  | 41.5 | 65   |
|            | ALL              | 216               | 54.8 | 178 | 45.2 | 394  |

**PHASE IV ALL SPECIES STUDY BOVINE**  
**STUDY: A131R-US-13-231**  
**TREATMENT SUCCESS RATE**  
**SUMMARY OF BACTERIAL ISOLATES BY TREATMENT SUCCESS**

treatment=T01 test material=DRAXXIN

|            |                       | treatment success |      |     |      | ALL  |
|------------|-----------------------|-------------------|------|-----|------|------|
|            |                       | NO                |      | YES |      |      |
|            |                       | n                 | %    | n   | %    | n    |
| period     | pasteurella multocida |                   |      |     |      |      |
| Arrival    | N                     | 375               | 40.8 | 543 | 59.2 | 918  |
|            | Y                     | 45                | 42.1 | 62  | 57.9 | 107  |
|            | ALL                   | 420               | 41.0 | 605 | 59.0 | 1025 |
| First Pull | pasteurella multocida |                   |      |     |      |      |
|            | N                     | 200               | 54.8 | 165 | 45.2 | 365  |
|            | Y                     | 16                | 55.2 | 13  | 44.8 | 29   |
|            | ALL                   | 216               | 54.8 | 178 | 45.2 | 394  |

PHASE IV ALL SPECIES STUDY BOVINE  
 STUDY: A131R-US-13-231  
 TREATMENT SUCCESS RATE  
 SUMMARY OF VIRAL EXPOSURE AT FIRST PULL

treatment=T01 test material=DRAXXIN

|            | Bovine Parainfluenza 3<br>(qPCR-BPI3) |      |          |      | ALL |
|------------|---------------------------------------|------|----------|------|-----|
|            | Negative                              |      | Positive |      |     |
|            | n                                     | %    | n        | %    | n   |
| period     |                                       |      |          |      |     |
| First Pull | 263                                   | 65.9 | 136      | 34.1 | 399 |

PHASE IV ALL SPECIES STUDY BOVINE  
 STUDY: A131R-US-13-231  
 TREATMENT SUCCESS RATE  
 SUMMARY OF VIRAL EXPOSURE AT FIRST PULL

treatment=T01 test material=DRAXXIN

|            | Bovine Respiratory Syncytial Virus (qPCR-BRSV-PCR) |      |          |      | ALL |
|------------|----------------------------------------------------|------|----------|------|-----|
|            | Negative                                           |      | Positive |      |     |
|            | n                                                  | %    | n        | %    | n   |
| period     |                                                    |      |          |      |     |
| First Pull | 183                                                | 45.9 | 216      | 54.1 | 399 |

PHASE IV ALL SPECIES STUDY BOVINE  
 STUDY: A131R-US-13-231  
 TREATMENT SUCCESS RATE  
 SUMMARY OF VIRAL EXPOSURE AT FIRST PULL

treatment=T01 test material=DRAXXIN

|            | Bovine Viral Diarrhea<br>(qPCR-BVD-PCR) |      |          |      | ALL |
|------------|-----------------------------------------|------|----------|------|-----|
|            | Negative                                |      | Positive |      |     |
|            | n                                       | %    | n        | %    | n   |
| period     |                                         |      |          |      |     |
| First Pull | 293                                     | 73.4 | 106      | 26.6 | 399 |

PHASE IV ALL SPECIES STUDY BOVINE  
 STUDY: A131R-US-13-231  
 TREATMENT SUCCESS RATE  
 SUMMARY OF VIRAL EXPOSURE AT FIRST PULL

treatment=T01 test material=DRAXXIN

|            | Infectious Bovine Rhinotracheitis (qPCR-IBR-BHV) |      |          |      |     |
|------------|--------------------------------------------------|------|----------|------|-----|
|            | Negative                                         |      | Positive |      | ALL |
|            | n                                                | %    | n        | %    | n   |
| period     |                                                  |      |          |      |     |
| First Pull | 355                                              | 89.0 | 44       | 11.0 | 399 |

STUDY: A131R-US-13-231

TREATMENT SUCCESS RATE

SUMMARY OF VIRAL EXPOSURE BY TREATMENT SUCCESS AT FIRST PULL

treatment=T01 test material=DRAXXIN

|            |                                    | treatment success |      |     |      | ALL |
|------------|------------------------------------|-------------------|------|-----|------|-----|
|            |                                    | NO                |      | YES |      |     |
|            |                                    | n                 | %    | n   | %    | n   |
| period     | Bovine Parainfluenza 3 (qPCR-BPI3) |                   |      |     |      |     |
| First Pull | Negative                           | 130               | 49.4 | 133 | 50.6 | 263 |
|            | Positive                           | 85                | 62.5 | 51  | 37.5 | 136 |
|            | ALL                                | 215               | 53.9 | 184 | 46.1 | 399 |

STUDY: A131R-US-13-231

TREATMENT SUCCESS RATE

SUMMARY OF VIRAL EXPOSURE BY TREATMENT SUCCESS AT FIRST PULL

treatment=T01 test material=DRAXXIN

|            |                                                    | treatment success |      |     |      | ALL |
|------------|----------------------------------------------------|-------------------|------|-----|------|-----|
|            |                                                    | NO                |      | YES |      |     |
|            |                                                    | n                 | %    | n   | %    | n   |
| period     | Bovine Respiratory Syncytial Virus (qPCR-BRSV-PCR) |                   |      |     |      |     |
| First Pull | Negative                                           | 83                | 45.4 | 100 | 54.6 | 183 |
|            | Positive                                           | 132               | 61.1 | 84  | 38.9 | 216 |
|            | ALL                                                | 215               | 53.9 | 184 | 46.1 | 399 |



SUMMARY OF VIRAL EXPOSURE BY TREATMENT SUCCESS AT FIRST PULL

treatment=T01 test material=DRAXXIN

|            |                                      | treatment success |      |     |      | ALL |
|------------|--------------------------------------|-------------------|------|-----|------|-----|
|            |                                      | NO                |      | YES |      |     |
|            |                                      | n                 | %    | n   | %    | n   |
| period     | Bovine Viral Diarrhea (qPCR-BVD-PCR) |                   |      |     |      |     |
| First Pull | Negative                             | 143               | 48.8 | 150 | 51.2 | 293 |
|            | Positive                             | 72                | 67.9 | 34  | 32.1 | 106 |
|            | ALL                                  | 215               | 53.9 | 184 | 46.1 | 399 |

STUDY: A131R-US-13-231

TREATMENT SUCCESS RATE

SUMMARY OF VIRAL EXPOSURE BY TREATMENT SUCCESS AT FIRST PULL

treatment=T01 test material=DRAXXIN

|            |                                                  | treatment success |      |     |      | ALL |
|------------|--------------------------------------------------|-------------------|------|-----|------|-----|
|            |                                                  | NO                |      | YES |      |     |
|            |                                                  | n                 | %    | n   | %    | n   |
| period     | Infectious Bovine Rhinotracheitis (qPCR-IBR-BHV) |                   |      |     |      |     |
| First Pull | Negative                                         | 181               | 51.0 | 174 | 49.0 | 355 |
|            | Positive                                         | 34                | 77.3 | 10  | 22.7 | 44  |
|            | ALL                                              | 215               | 53.9 | 184 | 46.1 | 399 |

PHASE IV ALL SPECIES STUDY BOVINE  
 STUDY: A131R-US-13-231  
 TREATMENT SUCCESS RATE  
 SUMMARY OF TIME OF ARRIVAL ON STUDY

09:30 Tuesday, October 27, 2015 74

treatment=T01 test material=DRAXXIN

|            | day 0 date |      |         |      |         |      |         |      |         |      |         |     |         |     |         |     | ALL  |   |
|------------|------------|------|---------|------|---------|------|---------|------|---------|------|---------|-----|---------|-----|---------|-----|------|---|
|            | 06MAR15    |      | 13MAR15 |      | 20MAR15 |      | 23MAR15 |      | 25MAR15 |      | 26MAR15 |     | 27MAR15 |     | 28MAR15 |     |      |   |
|            | n          | %    | n       | %    | n       | %    | n       | %    | n       | %    | n       | %   | n       | %   | n       | %   |      | n |
| period     |            |      |         |      |         |      |         |      |         |      |         |     |         |     |         |     |      |   |
| Arrival    | 92         | 9.0  | 193     | 18.8 | 175     | 17.1 | 174     | 17.0 | 113     | 11.0 | 87      | 8.5 | 92      | 9.0 | 99      | 9.7 | 1025 |   |
| First Pull | 41         | 10.2 | 90      | 22.4 | 74      | 18.4 | 72      | 17.9 | 26      | 6.5  | 32      | 8.0 | 31      | 7.7 | 36      | 9.0 | 402  |   |

DATA HAVE NOT BEEN VERIFIED

PHASE IV ALL SPECIES STUDY BOVINE  
 STUDY: A131R-US-13-231  
 TREATMENT SUCCESS RATE

SUMMARY OF TIME OF ARRIVAL ON STUDY BY TREATMENT SUCCESS

treatment=T01 test material=DRAXXIN

|         |            | treatment success |      |     |      | ALL  |
|---------|------------|-------------------|------|-----|------|------|
|         |            | NO                |      | YES |      |      |
|         |            | n                 | %    | n   | %    | n    |
| period  | day 0 date |                   |      |     |      |      |
| Arrival | 06MAR15    | 45                | 48.9 | 47  | 51.1 | 92   |
|         | 13MAR15    | 95                | 49.2 | 98  | 50.8 | 193  |
|         | 20MAR15    | 79                | 45.1 | 96  | 54.9 | 175  |
|         | 23MAR15    | 73                | 42.0 | 101 | 58.0 | 174  |
|         | 25MAR15    | 26                | 23.0 | 87  | 77.0 | 113  |
|         | 26MAR15    | 33                | 37.9 | 54  | 62.1 | 87   |
|         | 27MAR15    | 32                | 34.8 | 60  | 65.2 | 92   |
|         | 28MAR15    | 37                | 37.4 | 62  | 62.6 | 99   |
|         | ALL        | 420               | 41.0 | 605 | 59.0 | 1025 |
|         | First Pull | day 0 date        |      |     |      |      |
| 06MAR15 |            | 22                | 53.7 | 19  | 46.3 | 41   |
| 13MAR15 |            | 45                | 50.0 | 45  | 50.0 | 90   |
| 20MAR15 |            | 39                | 52.7 | 35  | 47.3 | 74   |
| 23MAR15 |            | 41                | 56.9 | 31  | 43.1 | 72   |
| 25MAR15 |            | 10                | 38.5 | 16  | 61.5 | 26   |
| 26MAR15 |            | 22                | 68.8 | 10  | 31.3 | 32   |
| 27MAR15 |            | 18                | 58.1 | 13  | 41.9 | 31   |
| 28MAR15 |            | 21                | 58.3 | 15  | 41.7 | 36   |
| ALL     |            | 218               | 54.2 | 184 | 45.8 | 402  |

**PHASE IV ALL SPECIES STUDY BOVINE**  
**STUDY: A131R-US-13-231**  
**TREATMENT SUCCESS RATE**  
**SUMMARY OF DAY 0 BODY WEIGHT BY TREATMENT SUCCESS**

treatment=T01 test material=DRAXXIN

|            |                   | day 0 weight (LBS) |       |           |         |         |
|------------|-------------------|--------------------|-------|-----------|---------|---------|
|            |                   | n                  | mean  | std. dev. | minimum | maximum |
| period     | treatment success |                    |       |           |         |         |
| Arrival    | NO                | 420                | 495.4 | 49.1      | 340     | 633     |
|            | YES               | 605                | 499.3 | 56.2      | 317     | 642     |
|            | All               | 1025               | 497.7 | 53.4      | 317     | 642     |
| First Pull | treatment success |                    |       |           |         |         |
|            | NO                | 218                | 492.8 | 46.2      | 372     | 597     |
|            | YES               | 184                | 498.7 | 52.5      | 340     | 633     |
|            | All               | 402                | 495.5 | 49.2      | 340     | 633     |

PHASE IV ALL SPECIES STUDY BOVINE  
 STUDY: A131R-US-13-231  
 TREATMENT SUCCESS RATE  
 SUMMARY OF MIC BY ANIMAL

treatment=T01 test material=DRAXXIN period=Arrival

| animal | day of study | day 0 date | day 0 weight (LBS) | histophilus somni | mannheimia haemolytica | mycoplasma bovis | pasteurella multocida | microorganism | mic    | resistant [1] | susceptible [2] |
|--------|--------------|------------|--------------------|-------------------|------------------------|------------------|-----------------------|---------------|--------|---------------|-----------------|
| 101    | 0            | 13MAR15    | 556                | N                 | Y                      | N                | N                     | MH            | 2      | NO            | YES             |
| 1011   | 0            | 28MAR15    | 487                | N                 | Y                      | N                | N                     | MH            | 1      | NO            | YES             |
| 1016   | 0            | 28MAR15    | 468                | N                 | Y                      | N                | N                     | MH            | 4      | NO            | YES             |
| 1018   | 0            | 28MAR15    | 522                | N                 | N                      | N                | Y                     | PM            | 0.25   | NO            | YES             |
| 1027   | 0            | 28MAR15    | 457                | N                 | Y                      | N                | Y                     | MH            | 2      | NO            | YES             |
|        |              |            | 457                | N                 | Y                      | N                | Y                     | PM            | 0.5    | NO            | YES             |
| 103    | 0            | 13MAR15    | 577                | N                 | N                      | N                | Y                     | PM            | 0.5    | NO            | YES             |
| 1034   | 0            | 28MAR15    | 497                | N                 | Y                      | N                | N                     | MH            | 2      | NO            | YES             |
| 11     | 0            | 06MAR15    | 438                | N                 | N                      | N                | Y                     | PM            | 0.5    | NO            | YES             |
| 110    | 0            | 13MAR15    | 456                | N                 | N                      | N                | Y                     | PM            | 0.5    | NO            | YES             |
| 112    | 0            | 13MAR15    | 551                | N                 | Y                      | N                | N                     | MH            | 2      | NO            | YES             |
| 115    | 0            | 13MAR15    | 493                | N                 | Y                      | N                | N                     | MH            | 2      | NO            | YES             |
| 117    | 0            | 13MAR15    | 447                | N                 | N                      | N                | Y                     | PM            | 0.5    | NO            | YES             |
| 119    | 0            | 13MAR15    | 545                | N                 | N                      | N                | Y                     | PM            | <=0.12 | NO            | YES             |
| 128    | 0            | 13MAR15    | 510                | N                 | Y                      | N                | N                     | MH            | 2      | NO            | YES             |
| 131    | 0            | 13MAR15    | 524                | N                 | N                      | N                | Y                     | PM            | 0.5    | NO            | YES             |
| 136    | 0            | 13MAR15    | 549                | N                 | N                      | N                | Y                     | PM            | 0.5    | NO            | YES             |
| 140    | 0            | 13MAR15    | 476                | N                 | Y                      | N                | N                     | MH            | 4      | NO            | YES             |
| 144    | 0            | 13MAR15    | 514                | N                 | Y                      | N                | N                     | MH            | 2      | NO            | YES             |
| 149    | 0            | 13MAR15    | 510                | N                 | Y                      | N                | N                     | MH            | 2      | NO            | YES             |
| 158    | 0            | 13MAR15    | 512                | N                 | Y                      | N                | N                     | MH            | 4      | NO            | YES             |
| 160    | 0            | 13MAR15    | 549                | N                 | Y                      | N                | Y                     | MH            | 2      | NO            | YES             |
|        |              |            | 549                | N                 | Y                      | N                | Y                     | PM            | 0.5    | NO            | YES             |
| 161    | 0            | 13MAR15    | 560                | N                 | N                      | N                | Y                     | PM            | 0.25   | NO            | YES             |
| 163    | 0            | 13MAR15    | 499                | N                 | Y                      | N                | N                     | MH            | 4      | NO            | YES             |
| 164    | 0            | 13MAR15    | 429                | N                 | N                      | N                | Y                     | PM            | 0.5    | NO            | YES             |
| 165    | 0            | 13MAR15    | 501                | N                 | Y                      | Y                | N                     | PMMH          | 1      | NO            | YES             |
| 166    | 0            | 13MAR15    | 568                | N                 | Y                      | N                | N                     | MH            | 1      | NO            | YES             |
| 167    | 0            | 13MAR15    | 569                | N                 | Y                      | Y                | N                     | MH            | 1      | NO            | YES             |
| 171    | 0            | 13MAR15    | 524                | N                 | Y                      | N                | N                     | MH            | 2      | NO            | YES             |
| 173    | 0            | 13MAR15    | 520                | N                 | Y                      | Y                | N                     | MH            | 2      | NO            | YES             |
| 174    | 0            | 13MAR15    | 436                | N                 | N                      | N                | Y                     | PM            | 0.5    | NO            | YES             |
| 177    | 0            | 13MAR15    | 507                | N                 | N                      | N                | Y                     | PM            | 0.5    | NO            | YES             |

DATA HAVE NOT BEEN VERIFIED

[1] MIC < 64 are non-resistant, MIC >= 64 are resistant.

[2] MIC > 16 are non-susceptible, MIC <= 16 are susceptible.

[3] Did not qualify for BRD re-treatment, not a BRD mortality and not removed for non-BRD reasons

PHASE IV ALL SPECIES STUDY BOVINE  
 STUDY: A131R-US-13-231  
 TREATMENT SUCCESS RATE  
 SUMMARY OF MIC BY ANIMAL

treatment=T01 test material=DRAXXIN period=Arrival

| animal | day of BRD | score | temperature (F) | day of removal | brd related | BRD mortality | treatment success [3] |
|--------|------------|-------|-----------------|----------------|-------------|---------------|-----------------------|
| 101    | 10         | 1     | 105.5           | 18             | BRD         |               | NO                    |
| 1011   | 24         | 1     | 105.9           |                |             |               | NO                    |
| 1016   | 37         | 1     | 105.5           | 40             | BRD         |               | NO                    |
| 1018   |            |       |                 |                |             |               | YES                   |
| 1027   |            |       |                 |                |             |               | YES                   |
|        |            |       |                 |                |             |               | YES                   |
| 103    |            |       |                 |                |             |               | YES                   |
| 1034   | 37         | 1     | 103.6           |                |             |               | NO                    |
| 11     | 10         | 1     | 103.5           |                |             |               | NO                    |
| 110    | 9          | 1     | 104.9           | 17             | BRD         |               | NO                    |
| 112    | 11         | 1     | 105.3           |                |             |               | NO                    |
| 115    | 7          | 1     | 104.6           | 13             | BRD         |               | NO                    |
| 117    | 12         | 1     | 103.6           |                |             |               | NO                    |
| 119    |            |       |                 |                |             |               | YES                   |
| 128    | 14         | 1     | 105.2           | 23             | BRD         |               | NO                    |
| 131    |            |       |                 |                |             |               | YES                   |
| 136    | 10         | 1     | 103.9           |                |             |               | NO                    |
| 140    | 12         | 1     | 104.5           | 28             | BRD         |               | NO                    |
| 144    | 10         | 1     | 105.1           |                |             |               | NO                    |
| 149    | 12         | 1     | 103.5           |                |             |               | NO                    |
| 158    |            |       |                 |                |             |               | YES                   |
| 160    | 7          | 1     | 103.5           | 14             | BRD         |               | NO                    |
|        | 7          | 1     | 103.5           | 14             | BRD         |               | NO                    |
| 161    |            |       |                 |                |             |               | YES                   |
| 163    | 11         | 1     | 106.2           | 18             | BRD         |               | NO                    |
| 164    | 12         | 1     | 103.7           | 20             | BRD         |               | NO                    |
| 165    | 8          | 1     | 104.7           | 17             | BRD         |               | NO                    |
| 166    | 8          | 1     | 104.7           | 16             | BRD         |               | NO                    |
| 167    | 18         | 1     | 106.5           |                |             |               | NO                    |
| 171    | 10         | 1     | 104.0           | 16             | BRD         |               | NO                    |
| 173    |            |       |                 |                |             |               | YES                   |
| 174    | 12         | 1     | 104.0           |                |             |               | NO                    |
| 177    | 8          | 1     | 104.8           | 30             | BRD         |               | NO                    |

DATA HAVE NOT BEEN VERIFIED

[1] MIC < 64 are non-resistant, MIC >= 64 are resistant.

[2] MIC > 16 are non-susceptible, MIC <= 16 are susceptible.

[3] Did not qualify for BRD re-treatment, not a BRD mortality and not removed for non-BRD reasons

PHASE IV ALL SPECIES STUDY BOVINE  
 STUDY: A131R-US-13-231  
 TREATMENT SUCCESS RATE  
 SUMMARY OF MIC BY ANIMAL

09:30 Tuesday, October 27, 2015 79

treatment=T01 test material=DRAXXIN period=Arrival

| animal | day of study | day 0 date | day 0 weight (LBS) | histophilus somni | mannheimia haemolytica | mycoplasma bovis | pasteurella multocida | microorganism | mic    | resistant [1] | susceptible [2] |
|--------|--------------|------------|--------------------|-------------------|------------------------|------------------|-----------------------|---------------|--------|---------------|-----------------|
| 178    | 0            | 13MAR15    | 479                | N                 | Y                      | N                | N                     | MH            | 2      | NO            | YES             |
| 179    | 0            | 13MAR15    | 542                | N                 | N                      | N                | Y                     | PM            | 0.5    | NO            | YES             |
| 18     | 0            | 06MAR15    | 505                | N                 | Y                      | N                | N                     | MH            | 1      | NO            | YES             |
| 183    | 0            | 13MAR15    | 500                | N                 | Y                      | N                | N                     | MH            | 2      | NO            | YES             |
| 189    | 0            | 13MAR15    | 508                | N                 | Y                      | N                | N                     | MH            | 4      | NO            | YES             |
| 190    | 0            | 13MAR15    | 556                | N                 | Y                      | N                | N                     | MH            | 2      | NO            | YES             |
| 198    | 0            | 13MAR15    | 489                | N                 | Y                      | N                | N                     | MH            | 1      | NO            | YES             |
| 199    | 0            | 13MAR15    | 554                | N                 | N                      | N                | Y                     | PM            | 0.5    | NO            | YES             |
| 2      | 0            | 06MAR15    | 436                | N                 | Y                      | N                | N                     | MH            | 2      | NO            | YES             |
| 20     | 0            | 06MAR15    | 438                | N                 | N                      | N                | Y                     | PM            | 0.5    | NO            | YES             |
| 203    | 0            | 13MAR15    | 496                | N                 | Y                      | N                | N                     | MH            | 4      | NO            | YES             |
| 205    | 0            | 13MAR15    | 475                | N                 | Y                      | N                | N                     | MH            | 1      | NO            | YES             |
| 209    | 0            | 13MAR15    | 545                | N                 | Y                      | N                | N                     | MH            | 1      | NO            | YES             |
| 211    | 0            | 13MAR15    | 512                | N                 | Y                      | N                | Y                     | MH            | 4      | NO            | YES             |
|        |              |            | 512                | N                 | Y                      | N                | Y                     | PM            | 0.25   | NO            | YES             |
| 214    | 0            | 13MAR15    | 475                | N                 | N                      | N                | Y                     | HSPM          | 0.25   | NO            | YES             |
| 222    | 0            | 13MAR15    | 490                | N                 | N                      | Y                | Y                     | PM            | 2      | NO            | YES             |
| 225    | 0            | 13MAR15    | 494                | N                 | Y                      | N                | N                     | MH            | 1      | NO            | YES             |
| 229    | 0            | 13MAR15    | 542                | N                 | N                      | N                | Y                     | PM            | 8      | NO            | YES             |
| 230    | 0            | 13MAR15    | 570                | N                 | N                      | N                | Y                     | PM            | 0.5    | NO            | YES             |
| 237    | 0            | 13MAR15    | 547                | N                 | Y                      | N                | N                     | MH            | 4      | NO            | YES             |
| 238    | 0            | 13MAR15    | 446                | N                 | N                      | N                | Y                     | PM            | 0.5    | NO            | YES             |
| 244    | 0            | 13MAR15    | 507                | N                 | Y                      | N                | N                     | MH            | 1      | NO            | YES             |
| 248    | 0            | 13MAR15    | 532                | N                 | Y                      | N                | N                     | MH            | 1      | NO            | YES             |
| 252    | 0            | 13MAR15    | 457                | N                 | N                      | N                | Y                     | PM            | <=0.12 | NO            | YES             |
| 253    | 0            | 13MAR15    | 503                | N                 | N                      | N                | Y                     | PM            | 0.5    | NO            | YES             |
| 263    | 0            | 13MAR15    | 512                | N                 | Y                      | N                | N                     | MH            | 2      | NO            | YES             |
| 268    | 0            | 13MAR15    | 560                | N                 | Y                      | N                | N                     | MH            | 1      | NO            | YES             |
| 272    | 0            | 13MAR15    | 463                | N                 | N                      | N                | Y                     | MHPM          | 0.5    | NO            | YES             |
| 276    | 0            | 13MAR15    | 501                | N                 | N                      | N                | Y                     | PM            | 1      | NO            | YES             |
| 28     | 0            | 06MAR15    | 506                | N                 | N                      | N                | Y                     | PM            | 0.5    | NO            | YES             |
| 283    | 0            | 13MAR15    | 510                | N                 | Y                      | N                | Y                     | MH            | 1      | NO            | YES             |
|        |              |            | 510                | N                 | Y                      | N                | Y                     | PM            | 0.5    | NO            | YES             |

DATA HAVE NOT BEEN VERIFIED

[1] MIC < 64 are non-resistant, MIC >= 64 are resistant.

[2] MIC > 16 are non-susceptible, MIC <= 16 are susceptible.

[3] Did not qualify for BRD re-treatment, not a BRD mortality and not removed for non-BRD reasons



PHASE IV ALL SPECIES STUDY BOVINE  
 STUDY: A131R-US-13-231  
 TREATMENT SUCCESS RATE  
 SUMMARY OF MIC BY ANIMAL

treatment=T01 test material=DRAXXIN period=Arrival

| animal | day of BRD | score | temperature (F) | day of removal | brd related | BRD mortality | treatment success [3] |
|--------|------------|-------|-----------------|----------------|-------------|---------------|-----------------------|
| 178    |            |       |                 |                |             |               | YES                   |
| 179    | 17         | 1     | 106.0           | 35             | BRD         |               | NO                    |
| 18     |            |       |                 |                |             |               | YES                   |
| 183    |            |       |                 |                |             |               | YES                   |
| 189    |            |       |                 |                |             |               | YES                   |
| 190    |            |       |                 |                |             |               | YES                   |
| 198    |            |       |                 |                |             |               | YES                   |
| 199    |            |       |                 |                |             |               | YES                   |
| 2      |            |       |                 |                |             |               | YES                   |
| 20     | 11         | 1     | 103.7           | 24             | BRD         |               | NO                    |
| 203    | 25         | 2     | 104.6           | 30             | BRD         |               | NO                    |
| 205    |            |       |                 |                |             |               | YES                   |
| 209    | 7          | 1     | 103.8           | 12             | BRD         |               | NO                    |
| 211    |            |       |                 |                |             |               | YES                   |
|        |            |       |                 |                |             |               | YES                   |
| 214    | 11         | 1     | 106.3           |                |             |               | NO                    |
| 222    | 8          | 1     | 105.6           |                |             |               | NO                    |
| 225    |            |       |                 |                |             |               | YES                   |
| 229    |            |       |                 |                |             |               | YES                   |
| 230    |            |       |                 |                |             |               | YES                   |
| 237    |            |       |                 |                |             |               | YES                   |
| 238    | 7          | 1     | 103.5           | 17             | BRD         |               | NO                    |
| 244    |            |       |                 |                |             |               | YES                   |
| 248    | 17         | 2     | 107.0           |                |             |               | NO                    |
| 252    |            |       |                 |                |             |               | YES                   |
| 253    |            |       |                 |                |             |               | YES                   |
| 263    |            |       |                 |                |             |               | YES                   |
| 268    | 18         | 1     | 104.5           |                |             |               | NO                    |
| 272    | 33         | 1     | 105.2           |                |             |               | NO                    |
| 276    |            |       |                 |                |             |               | YES                   |
| 28     |            |       |                 |                |             |               | YES                   |
| 283    |            |       |                 |                |             |               | YES                   |
|        |            |       |                 |                |             |               | YES                   |

DATA HAVE NOT BEEN VERIFIED

[1] MIC < 64 are non-resistant, MIC >= 64 are resistant.

[2] MIC > 16 are non-susceptible, MIC <= 16 are susceptible.

[3] Did not qualify for BRD re-treatment, not a BRD mortality and not removed for non-BRD reasons

PHASE IV ALL SPECIES STUDY BOVINE  
 STUDY: A131R-US-13-231  
 TREATMENT SUCCESS RATE  
 SUMMARY OF MIC BY ANIMAL

treatment=T01 test material=DRAXXIN period=Arrival

| animal | day of study | day 0 date | day 0 weight (LBS) | histophilus somni | mannheimia haemolytica | mycoplasma bovis | pasteurella multocida | microorganism | mic  | resistant [1] | susceptible [2] |
|--------|--------------|------------|--------------------|-------------------|------------------------|------------------|-----------------------|---------------|------|---------------|-----------------|
| 286    | 0            | 13MAR15    | 576                | N                 | N                      | N                | Y                     | PM            | 1    | NO            | YES             |
| 287    | 0            | 13MAR15    | 577                | N                 | Y                      | N                | N                     | MH            | 1    | NO            | YES             |
| 289    | 0            | 13MAR15    | 406                | N                 | Y                      | N                | N                     | MH            | 1    | NO            | YES             |
| 292    | 0            | 20MAR15    | 441                | N                 | Y                      | N                | N                     | MH            | 1    | NO            | YES             |
| 294    | 0            | 20MAR15    | 493                | N                 | Y                      | N                | N                     | MH            | 2    | NO            | YES             |
| 313    | 0            | 20MAR15    | 423                | N                 | N                      | N                | Y                     | PM            | 0.5  | NO            | YES             |
| 314    | 0            | 20MAR15    | 441                | N                 | N                      | N                | Y                     | MHPM          | 0.5  | NO            | YES             |
| 320    | 0            | 20MAR15    | 459                | N                 | N                      | N                | Y                     | PM            | 0.25 | NO            | YES             |
| 330    | 0            | 20MAR15    | 454                | N                 | N                      | N                | Y                     | PM            | 0.5  | NO            | YES             |
| 337    | 0            | 20MAR15    | 457                | N                 | N                      | N                | Y                     | PM            | 0.5  | NO            | YES             |
| 339    | 0            | 20MAR15    | 475                | N                 | N                      | N                | Y                     | PM            | 0.25 | NO            | YES             |
| 340    | 0            | 20MAR15    | 496                | N                 | N                      | N                | Y                     | PM            | 1    | NO            | YES             |
| 352    | 0            | 20MAR15    | 435                | N                 | N                      | N                | Y                     | PM            | 0.25 | NO            | YES             |
| 361    | 0            | 20MAR15    | 456                | N                 | N                      | N                | Y                     | PM            | 1    | NO            | YES             |
| 363    | 0            | 20MAR15    | 465                | N                 | Y                      | N                | N                     | MH            | 2    | NO            | YES             |
| 366    | 0            | 20MAR15    | 434                | N                 | Y                      | N                | N                     | MH            | 1    | NO            | YES             |
| 372    | 0            | 20MAR15    | 478                | N                 | N                      | N                | Y                     | PM            | 0.5  | NO            | YES             |
| 38     | 0            | 06MAR15    | 464                | N                 | Y                      | N                | N                     | MH            | 1    | NO            | YES             |
| 380    | 0            | 20MAR15    | 411                | N                 | N                      | N                | Y                     | PM            | 0.5  | NO            | YES             |
| 391    | 0            | 20MAR15    | 597                | N                 | N                      | N                | Y                     | PM            | 0.25 | NO            | YES             |
| 397    | 0            | 20MAR15    | 500                | N                 | N                      | N                | Y                     | PM            | 0.25 | NO            | YES             |
| 399    | 0            | 20MAR15    | 551                | N                 | N                      | N                | Y                     | PM            | 0.5  | NO            | YES             |
| 40     | 0            | 06MAR15    | 506                | N                 | N                      | N                | Y                     | PM            | 0.5  | NO            | YES             |
| 405    | 0            | 20MAR15    | 532                | N                 | Y                      | N                | N                     | MH            | 1    | NO            | YES             |
| 419    | 0            | 20MAR15    | 511                | N                 | N                      | N                | Y                     | PM            | 0.5  | NO            | YES             |
| 425    | 0            | 20MAR15    | 556                | N                 | N                      | N                | Y                     | PML           | 0.5  | NO            | YES             |
| 434    | 0            | 20MAR15    | 500                | N                 | N                      | N                | Y                     | PM            | 2    | NO            | YES             |
| 437    | 0            | 20MAR15    | 544                | N                 | Y                      | N                | Y                     | MH            | >64  | YES           | NO              |
|        |              |            | 544                | N                 | Y                      | N                | Y                     | PM            | 16   | NO            | YES             |
| 444    | 0            | 20MAR15    | 494                | N                 | Y                      | N                | N                     | MH            | 1    | NO            | YES             |
| 449    | 0            | 20MAR15    | 560                | N                 | Y                      | N                | N                     | MH            | 2    | NO            | YES             |
| 452    | 0            | 20MAR15    | 530                | N                 | N                      | N                | Y                     | PM            | 16   | NO            | YES             |
| 46     | 0            | 06MAR15    | 470                | N                 | N                      | N                | Y                     | PM            | 0.5  | NO            | YES             |

DATA HAVE NOT BEEN VERIFIED

[1] MIC < 64 are non-resistant, MIC >= 64 are resistant.

[2] MIC > 16 are non-susceptible, MIC <= 16 are susceptible.

[3] Did not qualify for BRD re-treatment, not a BRD mortality and not removed for non-BRD reasons

PHASE IV ALL SPECIES STUDY BOVINE  
 STUDY: A131R-US-13-231  
 TREATMENT SUCCESS RATE  
 SUMMARY OF MIC BY ANIMAL

treatment=T01 test material=DRAXXIN period=Arrival

| animal | day of BRD | score | temperature (F) | day of removal | brd related | BRD mortality | treatment success [3] |
|--------|------------|-------|-----------------|----------------|-------------|---------------|-----------------------|
| 286    |            |       |                 |                |             |               | YES                   |
| 287    | 17         | 1     | 105.7           |                |             |               | NO                    |
| 289    |            |       |                 |                |             |               | YES                   |
| 292    | 12         | 1     | 103.7           | 24             | BRD         |               | NO                    |
| 294    |            |       |                 |                |             |               | YES                   |
| 313    |            |       |                 |                |             |               | YES                   |
| 314    |            |       |                 |                |             |               | YES                   |
| 320    | 14         | 1     | 107.0           |                |             |               | NO                    |
| 330    | 8          | 1     | 106.1           | 12             | BRD         |               | NO                    |
| 337    |            |       |                 |                |             |               | YES                   |
| 339    |            |       |                 |                |             |               | YES                   |
| 340    |            |       |                 |                |             |               | YES                   |
| 352    |            |       |                 |                |             |               | YES                   |
| 361    |            |       |                 |                |             |               | YES                   |
| 363    |            |       |                 |                |             |               | YES                   |
| 366    | 10         | 1     | 107.4           | 17             | BRD         |               | NO                    |
| 372    |            |       |                 |                |             |               | YES                   |
| 38     | 11         | 1     | 103.9           |                |             |               | NO                    |
| 380    | 15         | 1     | 106.3           | 18             | BRD         |               | NO                    |
| 391    | 14         | 1     | 107.0           | 21             | BRD         |               | NO                    |
| 397    |            |       |                 |                |             |               | YES                   |
| 399    |            |       |                 |                |             |               | YES                   |
| 40     |            |       |                 |                |             |               | YES                   |
| 405    |            |       |                 |                |             |               | YES                   |
| 419    |            |       |                 |                |             |               | YES                   |
| 425    |            |       |                 |                |             |               | YES                   |
| 434    |            |       |                 |                |             |               | YES                   |
| 437    | 11         | 1     | 106.1           | 30             | BRD         |               | NO                    |
|        | 11         | 1     | 106.1           | 30             | BRD         |               | NO                    |
| 444    |            |       |                 |                |             |               | YES                   |
| 449    |            |       |                 |                |             |               | YES                   |
| 452    | 23         | 1     | 106.0           | 25             | BRD         |               | NO                    |
| 46     | 7          | 2     | 103.5           |                |             |               | NO                    |

DATA HAVE NOT BEEN VERIFIED

[1] MIC < 64 are non-resistant, MIC >= 64 are resistant.

[2] MIC > 16 are non-susceptible, MIC <= 16 are susceptible.

[3] Did not qualify for BRD re-treatment, not a BRD mortality and not removed for non-BRD reasons

PHASE IV ALL SPECIES STUDY BOVINE  
 STUDY: A131R-US-13-231  
 TREATMENT SUCCESS RATE  
 SUMMARY OF MIC BY ANIMAL

treatment=T01 test material=DRAXXIN period=Arrival

| animal | day of study | day 0 date | day 0 weight (LBS) | histophilus somni | mannheimia haemolytica | mycoplasma bovis | pasteurella multocida | microorganism | mic    | resistant [1] | susceptible [2] |
|--------|--------------|------------|--------------------|-------------------|------------------------|------------------|-----------------------|---------------|--------|---------------|-----------------|
| 464    | 0            | 20MAR15    | 497                | N                 | N                      | N                | Y                     | PM            | 1      | NO            | YES             |
| 472    | 0            | 23MAR15    | 514                | N                 | Y                      | N                | N                     | MH            | 4      | NO            | YES             |
| 473    | 0            | 23MAR15    | 450                | N                 | Y                      | N                | N                     | MH            | 2      | NO            | YES             |
| 474    | 0            | 23MAR15    | 502                | N                 | N                      | N                | Y                     | PM            | <=0.12 | NO            | YES             |
| 476    | 0            | 23MAR15    | 532                | N                 | Y                      | N                | N                     | MH            | 4      | NO            | YES             |
| 478    | 0            | 23MAR15    | 555                | N                 | N                      | N                | Y                     | PM            | 0.5    | NO            | YES             |
| 481    | 0            | 23MAR15    | 568                | N                 | N                      | N                | Y                     | PM            | 0.25   | NO            | YES             |
| 485    | 0            | 23MAR15    | 504                | N                 | Y                      | N                | N                     | MH            | 4      | NO            | YES             |
| 487    | 0            | 23MAR15    | 579                | N                 | Y                      | N                | N                     | MH            | 1      | NO            | YES             |
| 488    | 0            | 23MAR15    | 430                | N                 | Y                      | N                | N                     | MH            | 1      | NO            | YES             |
| 490    | 0            | 23MAR15    | 516                | N                 | N                      | N                | Y                     | PM            | >64    | YES           | NO              |
| 493    | 0            | 23MAR15    | 505                | N                 | Y                      | N                | N                     | MH            | 1      | NO            | YES             |
| 495    | 0            | 23MAR15    | 517                | N                 | Y                      | N                | Y                     | MH            | 1      | NO            | YES             |
|        |              |            | 517                | N                 | Y                      | N                | Y                     | PM            | 0.5    | NO            | YES             |
| 5      | 0            | 06MAR15    | 472                | N                 | N                      | N                | Y                     | PM            | 0.25   | NO            | YES             |
| 500    | 0            | 23MAR15    | 495                | N                 | Y                      | N                | N                     | MH            | 4      | NO            | YES             |
| 503    | 0            | 23MAR15    | 512                | N                 | N                      | N                | Y                     | PM            | 0.5    | NO            | YES             |
| 505    | 0            | 23MAR15    | 486                | N                 | Y                      | N                | Y                     | MH            | 1      | NO            | YES             |
|        |              |            | 486                | N                 | Y                      | N                | Y                     | PM            | 0.5    | NO            | YES             |
| 508    | 0            | 23MAR15    | 485                | N                 | N                      | N                | Y                     | PM            | 0.5    | NO            | YES             |
| 512    | 0            | 23MAR15    | 573                | N                 | N                      | N                | Y                     | PM            | 0.5    | NO            | YES             |
| 513    | 0            | 23MAR15    | 527                | N                 | N                      | N                | Y                     | PM            | 0.25   | NO            | YES             |
| 515    | 0            | 23MAR15    | 540                | N                 | Y                      | N                | N                     | MH            | 4      | NO            | YES             |
| 522    | 0            | 23MAR15    | 478                | N                 | N                      | N                | Y                     | PM            | 0.25   | NO            | YES             |
| 525    | 0            | 23MAR15    | 537                | N                 | N                      | N                | Y                     | PM            | 0.25   | NO            | YES             |
| 531    | 0            | 23MAR15    | 490                | N                 | Y                      | N                | Y                     | MH            | 2      | NO            | YES             |
|        |              |            | 490                | N                 | Y                      | N                | Y                     | PM            | 0.5    | NO            | YES             |
| 541    | 0            | 23MAR15    | 502                | N                 | Y                      | N                | N                     | MH            | 4      | NO            | YES             |
| 542    | 0            | 23MAR15    | 473                | N                 | Y                      | N                | N                     | MH            | 1      | NO            | YES             |
| 543    | 0            | 23MAR15    | 510                | N                 | Y                      | N                | N                     | MH            | 1      | NO            | YES             |
| 55     | 0            | 06MAR15    | 470                | N                 | N                      | N                | Y                     | PM            | 0.5    | NO            | YES             |
| 551    | 0            | 23MAR15    | 490                | N                 | Y                      | N                | Y                     | MH            | 4      | NO            | YES             |
|        |              |            | 490                | N                 | Y                      | N                | Y                     | PM            | 0.25   | NO            | YES             |

DATA HAVE NOT BEEN VERIFIED

[1] MIC < 64 are non-resistant, MIC >= 64 are resistant.

[2] MIC > 16 are non-susceptible, MIC <= 16 are susceptible.

[3] Did not qualify for BRD re-treatment, not a BRD mortality and not removed for non-BRD reasons

PHASE IV ALL SPECIES STUDY BOVINE  
 STUDY: A131R-US-13-231  
 TREATMENT SUCCESS RATE  
 SUMMARY OF MIC BY ANIMAL

treatment=T01 test material=DRAXXIN period=Arrival

| animal | day of BRD | score | temperature (F) | day of removal | brd related | BRD mortality | treatment success [3] |
|--------|------------|-------|-----------------|----------------|-------------|---------------|-----------------------|
| 464    |            |       |                 |                |             |               | YES                   |
| 472    |            |       |                 |                |             |               | YES                   |
| 473    | 11         | 1     | 104.1           | 18             | BRD         |               | NO                    |
| 474    | 12         | 1     | 104.9           |                |             |               | NO                    |
| 476    | 10         | 1     | 106.9           | 15             | BRD         |               | NO                    |
| 478    | 11         | 1     | 103.8           | 32             | BRD         |               | NO                    |
| 481    |            |       |                 |                |             |               | YES                   |
| 485    | 7          | 1     | 104.1           | 16             | BRD         |               | NO                    |
| 487    | 36         | 1     | 103.5           | 40             | BRD         |               | NO                    |
| 488    | 10         | 1     | 105.0           | 22             | BRD         |               | NO                    |
| 490    |            |       |                 |                |             |               | YES                   |
| 493    | 9          | 1     | 106.1           | 17             | BRD         |               | NO                    |
| 495    |            |       |                 |                |             |               | YES                   |
| 5      | 10         | 1     | 103.5           | 20             | BRD         |               | NO                    |
| 500    |            |       |                 |                |             |               | YES                   |
| 503    | 24         | 1     | 106.3           |                |             |               | NO                    |
| 505    | 7          | 1     | 105.3           | 15             | BRD         |               | NO                    |
|        | 7          | 1     | 105.3           | 15             | BRD         |               | NO                    |
| 508    | 15         | 1     | 106.2           | 18             | BRD         |               | NO                    |
| 512    | 10         | 1     | 103.8           |                |             |               | NO                    |
| 513    | 21         | 1     | 103.6           |                |             |               | NO                    |
| 515    |            |       |                 |                |             |               | YES                   |
| 522    | 9          | 1     | 103.8           | 27             | BRD         |               | NO                    |
| 525    |            |       |                 |                |             |               | YES                   |
| 531    | 15         | 1     | 106.2           | 22             | BRD         |               | NO                    |
|        | 15         | 1     | 106.2           | 22             | BRD         |               | NO                    |
| 541    | 12         | 1     | 105.6           | 19             | BRD         |               | NO                    |
| 542    | 19         | 1     | 103.6           |                |             |               | NO                    |
| 543    | 11         | 1     | 104.6           | 19             | BRD         |               | NO                    |
| 55     | 10         | 1     | 105.9           |                |             |               | NO                    |
| 551    | 36         | 1     | 105.2           |                |             |               | NO                    |
|        | 36         | 1     | 105.2           |                |             |               | NO                    |

DATA HAVE NOT BEEN VERIFIED

[1] MIC < 64 are non-resistant, MIC >= 64 are resistant.

[2] MIC > 16 are non-susceptible, MIC <= 16 are susceptible.

[3] Did not qualify for BRD re-treatment, not a BRD mortality and not removed for non-BRD reasons

PHASE IV ALL SPECIES STUDY BOVINE  
 STUDY: A131R-US-13-231  
 TREATMENT SUCCESS RATE  
 SUMMARY OF MIC BY ANIMAL

treatment=T01 test material=DRAXXIN period=Arrival

| animal | day of study | day 0 date | day 0 weight (LBS) | histophilus somni | mannheimia haemolytica | mycoplasma bovis | pasteurella multocida | microorganism | mic  | resistant [1] | susceptible [2] |
|--------|--------------|------------|--------------------|-------------------|------------------------|------------------|-----------------------|---------------|------|---------------|-----------------|
| 553    | 0            | 23MAR15    | 543                | N                 | Y                      | N                | N                     | MH            | 1    | NO            | YES             |
| 554    | 0            | 23MAR15    | 493                | N                 | N                      | N                | Y                     | PM1           | 0.25 | NO            | YES             |
| 556    | 0            | 23MAR15    | 577                | N                 | Y                      | N                | N                     | MH            | 2    | NO            | YES             |
| 557    | 0            | 23MAR15    | 542                | N                 | Y                      | N                | N                     | MH            | 2    | NO            | YES             |
| 561    | 0            | 23MAR15    | 569                | N                 | Y                      | N                | N                     | MH            | 2    | NO            | YES             |
| 563    | 0            | 23MAR15    | 601                | N                 | N                      | N                | Y                     | PM            | 0.5  | NO            | YES             |
| 574    | 0            | 23MAR15    | 514                | N                 | N                      | N                | Y                     | PM            | 1    | NO            | YES             |
| 576    | 0            | 23MAR15    | 563                | N                 | Y                      | N                | N                     | MH            | 2    | NO            | YES             |
| 578    | 0            | 23MAR15    | 505                | N                 | Y                      | N                | N                     | MH            | 1    | NO            | YES             |
| 579    | 0            | 23MAR15    | 578                | N                 | Y                      | N                | Y                     | MH            | 2    | NO            | YES             |
|        |              |            | 578                | N                 | Y                      | N                | Y                     | PM            | 0.5  | NO            | YES             |
| 58     | 0            | 06MAR15    | 557                | N                 | N                      | N                | Y                     | PM            | 1    | NO            | YES             |
| 582    | 0            | 23MAR15    | 554                | N                 | Y                      | N                | N                     | MH            | 32   | NO            | NO              |
| 588    | 0            | 23MAR15    | 488                | N                 | Y                      | N                | Y                     | MH            | 1    | NO            | YES             |
|        |              |            | 488                | N                 | Y                      | N                | Y                     | PM            | 0.25 | NO            | YES             |
| 59     | 0            | 06MAR15    | 499                | N                 | N                      | N                | Y                     | PM            | 1    | NO            | YES             |
| 593    | 0            | 23MAR15    | 580                | N                 | N                      | N                | Y                     | PM            | 0.5  | NO            | YES             |
| 595    | 0            | 23MAR15    | 619                | N                 | Y                      | N                | Y                     | MH            | 1    | NO            | YES             |
|        |              |            | 619                | N                 | Y                      | N                | Y                     | PM            | 0.5  | NO            | YES             |
| 597    | 0            | 23MAR15    | 535                | N                 | Y                      | N                | Y                     | MH            | 1    | NO            | YES             |
|        |              |            | 535                | N                 | Y                      | N                | Y                     | PM            | 0.5  | NO            | YES             |
| 601    | 0            | 23MAR15    | 554                | N                 | N                      | N                | Y                     | PM            | 0.5  | NO            | YES             |
| 606    | 0            | 23MAR15    | 572                | N                 | Y                      | N                | Y                     | MH            | 32   | NO            | NO              |
|        |              |            | 572                | N                 | Y                      | N                | Y                     | PM            | 0.5  | NO            | YES             |
| 607    | 0            | 23MAR15    | 538                | N                 | N                      | N                | Y                     | PM            | 0.5  | NO            | YES             |
| 608    | 0            | 23MAR15    | 540                | N                 | N                      | N                | Y                     | PM            | 0.5  | NO            | YES             |
| 609    | 0            | 23MAR15    | 586                | N                 | Y                      | N                | N                     | MH            | 1    | NO            | YES             |
| 612    | 0            | 23MAR15    | 549                | N                 | Y                      | N                | N                     | MH            | 32   | NO            | NO              |
| 614    | 0            | 23MAR15    | 580                | N                 | Y                      | N                | N                     | MH            | 32   | NO            | NO              |
| 616    | 0            | 23MAR15    | 546                | N                 | Y                      | N                | N                     | MH            | 2    | NO            | YES             |
| 617    | 0            | 23MAR15    | 600                | N                 | Y                      | N                | N                     | MH            | 16   | NO            | YES             |
| 618    | 0            | 23MAR15    | 516                | N                 | Y                      | N                | N                     | MH            | 0.5  | NO            | YES             |
| 619    | 0            | 23MAR15    | 588                | N                 | Y                      | N                | N                     | MH            | 1    | NO            | YES             |

DATA HAVE NOT BEEN VERIFIED

[1] MIC < 64 are non-resistant, MIC >= 64 are resistant.

[2] MIC > 16 are non-susceptible, MIC <= 16 are susceptible.

[3] Did not qualify for BRD re-treatment, not a BRD mortality and not removed for non-BRD reasons

PHASE IV ALL SPECIES STUDY BOVINE  
 STUDY: A131R-US-13-231  
 TREATMENT SUCCESS RATE  
 SUMMARY OF MIC BY ANIMAL

treatment=T01 test material=DRAXXIN period=Arrival

| animal | day of BRD | score | temperature (F) | day of removal | brd related | BRD mortality | treatment success [3] |
|--------|------------|-------|-----------------|----------------|-------------|---------------|-----------------------|
| 553    |            |       |                 |                |             |               | YES                   |
| 554    |            |       |                 |                |             |               | YES                   |
| 556    | 7          | 1     | 106.7           |                |             |               | NO                    |
| 557    |            |       |                 |                |             |               | YES                   |
| 561    | 20         | 1     | 105.6           |                |             |               | NO                    |
| 563    |            |       |                 |                |             |               | YES                   |
| 574    |            |       |                 |                |             |               | YES                   |
| 576    | 7          | 1     | 103.8           |                |             |               | NO                    |
| 578    |            |       |                 |                |             |               | YES                   |
| 579    |            |       |                 |                |             |               | YES                   |
| 58     |            |       |                 |                |             |               | YES                   |
| 582    | 29         | 1     | 106.1           |                |             |               | NO                    |
| 588    |            |       |                 |                |             |               | YES                   |
| 59     |            |       |                 |                |             |               | YES                   |
| 593    |            |       |                 |                |             |               | YES                   |
| 595    | 16         | 1     | 104.1           |                |             |               | NO                    |
|        | 16         | 1     | 104.1           |                |             |               | NO                    |
| 597    |            |       |                 |                |             |               | YES                   |
| 601    | 8          | 1     | 103.5           | 31             | BRD         |               | NO                    |
| 606    |            |       |                 |                |             |               | YES                   |
| 607    |            |       |                 |                |             |               | YES                   |
| 608    |            |       |                 |                |             |               | YES                   |
| 609    |            |       |                 |                |             |               | YES                   |
| 612    |            |       |                 |                |             |               | YES                   |
| 614    |            |       |                 |                |             |               | YES                   |
| 616    |            |       |                 |                |             |               | YES                   |
| 617    | 28         | 1     | 105.1           |                |             |               | NO                    |
| 618    | 7          | 1     | 104.8           |                |             |               | NO                    |
| 619    | 16         | 1     | 104.7           | 24             | BRD         |               | NO                    |

DATA HAVE NOT BEEN VERIFIED

[1] MIC < 64 are non-resistant, MIC >= 64 are resistant.

[2] MIC > 16 are non-susceptible, MIC <= 16 are susceptible.

[3] Did not qualify for BRD re-treatment, not a BRD mortality and not removed for non-BRD reasons

PHASE IV ALL SPECIES STUDY BOVINE  
 STUDY: A131R-US-13-231  
 TREATMENT SUCCESS RATE  
 SUMMARY OF MIC BY ANIMAL

09:30 Tuesday, October 27, 2015 87

treatment=T01 test material=DRAXXIN period=Arrival

| animal | day of study | day 0 date | day 0 weight (LBS) | histophilus somni | mannheimia haemolytica | mycoplasma bovis | pasteurella multocida | microorganism | mic    | resistant [1] | susceptible [2] |
|--------|--------------|------------|--------------------|-------------------|------------------------|------------------|-----------------------|---------------|--------|---------------|-----------------|
| 620    | 0            | 23MAR15    | 547                | N                 | Y                      | N                | N                     | MH            | 4      | NO            | YES             |
| 623    | 0            | 23MAR15    | 591                | N                 | Y                      | N                | N                     | MH            | 2      | NO            | YES             |
| 624    | 0            | 23MAR15    | 548                | N                 | N                      | N                | Y                     | PM            | 0.5    | NO            | YES             |
| 626    | 0            | 23MAR15    | 490                | N                 | N                      | N                | Y                     | PM            | <=0.12 | NO            | YES             |
| 630    | 0            | 23MAR15    | 550                | N                 | Y                      | N                | N                     | MH            | 2      | NO            | YES             |
| 631    | 0            | 23MAR15    | 568                | N                 | Y                      | N                | N                     | MH            | 32     | NO            | NO              |
| 632    | 0            | 23MAR15    | 558                | N                 | N                      | N                | Y                     | PM            | 0.5    | NO            | YES             |
| 634    | 0            | 23MAR15    | 534                | N                 | Y                      | N                | N                     | MH            | 32     | NO            | NO              |
| 637    | 0            | 23MAR15    | 526                | N                 | Y                      | N                | N                     | MH            | 32     | NO            | NO              |
| 641    | 0            | 23MAR15    | 588                | N                 | Y                      | N                | N                     | MH            | 16     | NO            | YES             |
| 65     | 0            | 06MAR15    | 503                | N                 | N                      | N                | Y                     | PM            | 0.5    | NO            | YES             |
| 665    | 0            | 25MAR15    | 437                | N                 | N                      | N                | Y                     | PM            | 0.5    | NO            | YES             |
| 669    | 0            | 25MAR15    | 405                | N                 | Y                      | N                | N                     | MH            | 0.5    | NO            | YES             |
| 68     | 0            | 06MAR15    | 590                | N                 | Y                      | N                | N                     | MH            | 2      | NO            | YES             |
| 687    | 0            | 25MAR15    | 418                | Y                 | N                      | N                | Y                     | PM            | 0.25   | NO            | YES             |
| 689    | 0            | 25MAR15    | 427                | N                 | N                      | N                | Y                     | PM            | 0.5    | NO            | YES             |
| 69     | 0            | 06MAR15    | 497                | N                 | Y                      | N                | N                     | PMMH          | 2      | NO            | YES             |
| 694    | 0            | 25MAR15    | 407                | N                 | Y                      | N                | N                     | MH            | 1      | NO            | YES             |
| 711    | 0            | 25MAR15    | 430                | N                 | N                      | N                | Y                     | PM            | 0.5    | NO            | YES             |
| 716    | 0            | 25MAR15    | 408                | N                 | Y                      | N                | N                     | MH            | 1      | NO            | YES             |
| 729    | 0            | 25MAR15    | 371                | N                 | N                      | N                | Y                     | PM            | 0.25   | NO            | YES             |
| 733    | 0            | 25MAR15    | 382                | N                 | N                      | N                | Y                     | PM            | 0.5    | NO            | YES             |
| 74     | 0            | 06MAR15    | 420                | N                 | N                      | N                | Y                     | PM            | 0.5    | NO            | YES             |
| 743    | 0            | 25MAR15    | 424                | N                 | Y                      | Y                | N                     | MH            | 2      | NO            | YES             |
| 746    | 0            | 25MAR15    | 432                | N                 | N                      | N                | Y                     | PM            | 0.25   | NO            | YES             |
| 765    | 0            | 26MAR15    | 504                | N                 | N                      | N                | Y                     | PM            | 1      | NO            | YES             |
| 767    | 0            | 26MAR15    | 508                | N                 | N                      | N                | Y                     | PM            | 64     | YES           | NO              |
| 770    | 0            | 26MAR15    | 525                | N                 | Y                      | N                | N                     | MH            | 1      | NO            | YES             |
| 794    | 0            | 26MAR15    | 462                | N                 | N                      | N                | Y                     | PM            | 0.5    | NO            | YES             |
| 796    | 0            | 26MAR15    | 439                | N                 | Y                      | N                | N                     | MH            | 1      | NO            | YES             |
| 808    | 0            | 26MAR15    | 470                | N                 | Y                      | N                | Y                     | HSPM          | 0.25   | NO            | YES             |
|        |              |            | 470                | N                 | Y                      | N                | Y                     | MH            | 1      | NO            | YES             |
| 83     | 0            | 06MAR15    | 540                | N                 | Y                      | N                | N                     | MH            | 0.5    | NO            | YES             |

DATA HAVE NOT BEEN VERIFIED

[1] MIC < 64 are non-resistant, MIC >= 64 are resistant.

[2] MIC > 16 are non-susceptible, MIC <= 16 are susceptible.

[3] Did not qualify for BRD re-treatment, not a BRD mortality and not removed for non-BRD reasons



PHASE IV ALL SPECIES STUDY BOVINE  
 STUDY: A131R-US-13-231  
 TREATMENT SUCCESS RATE  
 SUMMARY OF MIC BY ANIMAL

treatment=T01 test material=DRAXXIN period=Arrival

| animal | day of BRD | score | temperature (F) | day of removal | brd related | BRD mortality | treatment success [3] |
|--------|------------|-------|-----------------|----------------|-------------|---------------|-----------------------|
| 620    |            |       |                 |                |             |               | YES                   |
| 623    |            |       |                 |                |             |               | YES                   |
| 624    |            |       |                 |                |             |               | YES                   |
| 626    | 16         | 1     | 104.3           |                |             |               | NO                    |
| 630    | 24         | 1     | 104.2           |                |             |               | NO                    |
| 631    | 7          | 1     | 104.6           | 14             | BRD         |               | NO                    |
| 632    |            |       |                 |                |             |               | YES                   |
| 634    |            |       |                 |                |             |               | YES                   |
| 637    |            |       |                 |                |             |               | YES                   |
| 641    |            |       |                 |                |             |               | YES                   |
| 65     | 11         | 1     | 103.6           | 17             | BRD         |               | NO                    |
| 665    | 20         | 1     | 103.5           |                |             |               | NO                    |
| 669    |            |       |                 |                |             |               | YES                   |
| 68     |            |       |                 |                |             |               | YES                   |
| 687    |            |       |                 |                |             |               | YES                   |
| 689    |            |       |                 |                |             |               | YES                   |
| 69     | 10         | 1     | 105.3           | 18             | BRD         |               | NO                    |
| 694    |            |       |                 |                |             |               | YES                   |
| 711    |            |       |                 |                |             |               | YES                   |
| 716    |            |       |                 |                |             |               | YES                   |
| 729    |            |       |                 |                |             |               | YES                   |
| 733    |            |       |                 |                |             |               | YES                   |
| 74     | 7          | 1     | 103.9           |                |             |               | NO                    |
| 743    |            |       |                 |                |             |               | YES                   |
| 746    |            |       |                 |                |             |               | YES                   |
| 765    | 13         | 1     | 106.8           |                |             |               | NO                    |
| 767    |            |       |                 |                |             |               | YES                   |
| 770    |            |       |                 |                |             |               | YES                   |
| 794    |            |       |                 |                |             |               | YES                   |
| 796    |            |       |                 |                |             |               | YES                   |
| 808    |            |       |                 |                |             |               | YES                   |
|        |            |       |                 |                |             |               | YES                   |
| 83     | 11         | 1     | 103.6           |                |             |               | NO                    |

DATA HAVE NOT BEEN VERIFIED

[1] MIC < 64 are non-resistant, MIC >= 64 are resistant.

[2] MIC > 16 are non-susceptible, MIC <= 16 are susceptible.

[3] Did not qualify for BRD re-treatment, not a BRD mortality and not removed for non-BRD reasons

PHASE IV ALL SPECIES STUDY BOVINE  
 STUDY: A131R-US-13-231  
 TREATMENT SUCCESS RATE  
 SUMMARY OF MIC BY ANIMAL

treatment=T01 test material=DRAXXIN period=Arrival

| animal | day of study | day 0 date | day 0 weight (LBS) | histophilus somni | mannheimia haemolytica | mycoplasma bovis | pasteurella multocida | microorganism | mic  | resistant [1] | susceptible [2] |
|--------|--------------|------------|--------------------|-------------------|------------------------|------------------|-----------------------|---------------|------|---------------|-----------------|
| 84     | 0            | 06MAR15    | 460                | N                 | Y                      | N                | Y                     | MH            | 1    | NO            | YES             |
|        |              |            | 460                | N                 | Y                      | N                | Y                     | PM            | 0.5  | NO            | YES             |
| 848    | 0            | 26MAR15    | 499                | N                 | N                      | N                | Y                     | PM            | 0.5  | NO            | YES             |
| 849    | 0            | 27MAR15    | 566                | N                 | Y                      | N                | N                     | MH            | 4    | NO            | YES             |
| 86     | 0            | 06MAR15    | 418                | N                 | Y                      | N                | N                     | MH            | 4    | NO            | YES             |
| 87     | 0            | 06MAR15    | 444                | N                 | Y                      | N                | N                     | PMMH          | 2    | NO            | YES             |
| 872    | 0            | 27MAR15    | 534                | N                 | N                      | N                | Y                     | PM            | 0.5  | NO            | YES             |
| 875    | 0            | 27MAR15    | 519                | N                 | N                      | N                | Y                     | PM            | 0.5  | NO            | YES             |
| 879    | 0            | 27MAR15    | 471                | N                 | Y                      | N                | N                     | MH            | >64  | YES           | NO              |
| 89     | 0            | 06MAR15    | 479                | N                 | N                      | N                | Y                     | PM            | 1    | NO            | YES             |
| 892    | 0            | 27MAR15    | 546                | N                 | Y                      | N                | N                     | MH            | 1    | NO            | YES             |
| 910    | 0            | 27MAR15    | 498                | N                 | Y                      | N                | N                     | MH            | 1    | NO            | YES             |
| 912    | 0            | 27MAR15    | 506                | N                 | Y                      | N                | N                     | MH            | 1    | NO            | YES             |
| 917    | 0            | 27MAR15    | 525                | N                 | N                      | N                | Y                     | PM            | 0.5  | NO            | YES             |
| 94     | 0            | 06MAR15    | 452                | N                 | N                      | N                | Y                     | PM            | 0.5  | NO            | YES             |
| 947    | 0            | 28MAR15    | 477                | N                 | Y                      | N                | N                     | MH            | 0.5  | NO            | YES             |
| 952    | 0            | 28MAR15    | 462                | N                 | Y                      | N                | N                     | MH            | 0.5  | NO            | YES             |
| 961    | 0            | 28MAR15    | 418                | N                 | N                      | N                | Y                     | PM            | 0.5  | NO            | YES             |
| 979    | 0            | 28MAR15    | 429                | N                 | Y                      | N                | N                     | MH            | 0.5  | NO            | YES             |
| 990    | 0            | 28MAR15    | 516                | N                 | Y                      | N                | N                     | MH            | 1    | NO            | YES             |
| 993    | 0            | 28MAR15    | 593                | N                 | N                      | N                | Y                     | PM            | 0.25 | NO            | YES             |

DATA HAVE NOT BEEN VERIFIED

[1] MIC < 64 are non-resistant, MIC >= 64 are resistant.

[2] MIC > 16 are non-susceptible, MIC <= 16 are susceptible.

[3] Did not qualify for BRD re-treatment, not a BRD mortality and not removed for non-BRD reasons

PHASE IV ALL SPECIES STUDY BOVINE  
 STUDY: A131R-US-13-231  
 TREATMENT SUCCESS RATE  
 SUMMARY OF MIC BY ANIMAL

treatment=T01 test material=DRAXXIN period=Arrival

| animal | day of BRD | score | temperature (F) | day of removal | brd related mortality | BRD mortality | treatment success [3] |
|--------|------------|-------|-----------------|----------------|-----------------------|---------------|-----------------------|
| 84     | 7          | 2     | 103.6           |                |                       |               | NO                    |
|        | 7          | 2     | 103.6           |                |                       |               | NO                    |
| 848    |            |       |                 |                |                       |               | YES                   |
| 849    |            |       |                 |                |                       |               | YES                   |
| 86     | 13         | 1     | 104.9           | 19             | BRD                   |               | NO                    |
| 87     | 19         | 1     | 103.5           |                |                       |               | NO                    |
| 872    | 7          | 1     | 104.2           |                |                       |               | NO                    |
| 875    |            |       |                 |                |                       |               | YES                   |
| 879    |            |       |                 |                |                       |               | YES                   |
| 89     | 7          | 2     | 102.4           |                |                       |               | NO                    |
| 892    |            |       |                 |                |                       |               | YES                   |
| 910    |            |       |                 |                |                       |               | YES                   |
| 912    | 10         | 1     | 104.3           | 18             | BRD                   |               | NO                    |
| 917    | 27         | 1     | 103.5           |                |                       |               | NO                    |
| 94     |            |       |                 |                |                       |               | YES                   |
| 947    | 11         | 1     | 104.7           | 13             | BRD                   |               | NO                    |
| 952    |            |       |                 |                |                       |               | YES                   |
| 961    |            |       |                 |                |                       |               | YES                   |
| 979    |            |       |                 |                |                       |               | YES                   |
| 990    | 16         | 1     | 106.9           | 18             | BRD                   |               | NO                    |
| 993    | 7          | 1     | 104.4           |                |                       |               | NO                    |

DATA HAVE NOT BEEN VERIFIED

[1] MIC < 64 are non-resistant, MIC >= 64 are resistant.

[2] MIC > 16 are non-susceptible, MIC <= 16 are susceptible.

[3] Did not qualify for BRD re-treatment, not a BRD mortality and not removed for non-BRD reasons

**PHASE IV ALL SPECIES STUDY BOVINE  
STUDY: A131R-US-13-231  
TREATMENT SUCCESS RATE  
SUMMARY OF MIC BY ANIMAL**

treatment=T01 test material=DRAXXIN period=First Pull

| animal | day of study | day 0 date | day 0 weight (LBS) | histophilus somni | mannheimia haemolytica | mycoplasma bovis | pasteurella multocida | Bovine Parainfluenza 3 (qPCR-BPI3) | Bovine Respiratory Syncytial Virus (qPCR-BRSV-PCR) | Bovine Viral Diarrhea (qPCR-BVD-PCR) | Infectious Bovine Rhinotracheitis (qPCR-IBR-BHV) |
|--------|--------------|------------|--------------------|-------------------|------------------------|------------------|-----------------------|------------------------------------|----------------------------------------------------|--------------------------------------|--------------------------------------------------|
| 1004   | 19           | 28MAR15    | 540                | N                 | Y                      | P                | N                     | Negative                           | Negative                                           | Negative                             | Negative                                         |
| 1006   | 12           | 28MAR15    | 450                | N                 | Y                      | N                | N                     | Negative                           | Positive                                           | Negative                             | Negative                                         |
| 101    | 10           | 13MAR15    | 556                | N                 | Y                      | N                | N                     | Positive                           | Positive                                           | Positive                             | Positive                                         |
| 1011   | 24           | 28MAR15    | 487                | N                 | Y                      | P                | N                     | Negative                           | Negative                                           | Negative                             | Negative                                         |
| 1016   | 37           | 28MAR15    | 468                | N                 | Y                      |                  | Y                     | Negative                           | Positive                                           | Negative                             | Negative                                         |
|        |              |            | 468                | N                 | Y                      |                  | Y                     | Negative                           | Positive                                           | Negative                             | Negative                                         |
| 1030   | 11           | 28MAR15    | 533                | N                 | Y                      | N                | N                     | Positive                           | Positive                                           | Positive                             | Negative                                         |
| 1032   | 14           | 28MAR15    | 470                | N                 | Y                      | N                | N                     | Negative                           | Positive                                           | Negative                             | Negative                                         |
| 1033   | 16           | 28MAR15    | 487                | N                 | Y                      | N                | N                     | Negative                           | Negative                                           | Negative                             | Negative                                         |
| 104    | 12           | 13MAR15    | 548                | N                 | Y                      | Y                | N                     | Negative                           | Negative                                           | Negative                             | Negative                                         |
| 112    | 11           | 13MAR15    | 551                | N                 | N                      | Y                | Y                     | Positive                           | Negative                                           | Positive                             | Negative                                         |
| 130    | 11           | 13MAR15    | 590                | N                 | Y                      | Y                | N                     | Positive                           | Negative                                           | Positive                             | Negative                                         |
| 133    | 11           | 13MAR15    | 532                | N                 | Y                      | Y                | N                     | Positive                           | Positive                                           | Positive                             | Positive                                         |
| 141    | 11           | 13MAR15    | 539                | N                 | Y                      | Y                | N                     | Positive                           | Negative                                           | Positive                             | Negative                                         |
| 142    | 12           | 13MAR15    | 462                | N                 | Y                      | Y                | N                     | Negative                           | Negative                                           | Positive                             | Negative                                         |
| 159    | 11           | 13MAR15    | 541                | Y                 | Y                      | Y                | N                     | Negative                           | Positive                                           | Positive                             | Positive                                         |
| 163    | 11           | 13MAR15    | 499                | N                 | Y                      | Y                | N                     | Positive                           | Positive                                           | Positive                             | Negative                                         |
| 164    | 12           | 13MAR15    | 429                | N                 | N                      | N                | Y                     | Positive                           | Positive                                           | Negative                             | Negative                                         |
| 167    | 18           | 13MAR15    | 569                | N                 | Y                      | Y                | N                     | Negative                           | Positive                                           | Negative                             | Negative                                         |
| 179    | 17           | 13MAR15    | 542                | N                 | Y                      | Y                | N                     | Negative                           | Negative                                           | Negative                             | Negative                                         |
| 181    | 17           | 13MAR15    | 478                | N                 | Y                      | Y                | N                     | Negative                           | Negative                                           | Negative                             | Negative                                         |
| 184    | 7            | 13MAR15    | 517                | N                 | Y                      | Y                | N                     | Positive                           | Positive                                           | Negative                             | Negative                                         |
| 200    | 40           | 13MAR15    | 477                | Y                 | Y                      | N                | Y                     | Negative                           | Negative                                           | Negative                             | Negative                                         |
|        |              |            | 477                | Y                 | Y                      | N                | Y                     | Negative                           | Negative                                           | Negative                             | Negative                                         |
| 201    | 7            | 13MAR15    | 470                | N                 | Y                      | N                | N                     | Positive                           | Positive                                           | Negative                             | Negative                                         |
| 202    | 18           | 13MAR15    | 575                | N                 | Y                      | Y                | N                     | Positive                           | Positive                                           | Negative                             | Negative                                         |
| 212    | 13           | 13MAR15    | 483                | N                 | Y                      | Y                | N                     | Negative                           | Negative                                           | Negative                             | Negative                                         |
| 221    | 19           | 13MAR15    | 486                | N                 | Y                      | N                | N                     | Positive                           | Negative                                           | Negative                             | Negative                                         |
| 222    | 8            | 13MAR15    | 490                | N                 | Y                      | Y                | N                     | Positive                           | Positive                                           | Negative                             | Negative                                         |
| 232    | 14           | 13MAR15    | 508                | N                 | Y                      | Y                | N                     | Positive                           | Positive                                           | Negative                             | Negative                                         |
| 248    | 17           | 13MAR15    | 532                | N                 | Y                      | N                | N                     | Negative                           | Positive                                           | Negative                             | Negative                                         |

**DATA HAVE NOT BEEN VERIFIED**

[1] MIC < 64 are non-resistant, MIC >= 64 are resistant.

[2] MIC > 16 are non-susceptible, MIC <= 16 are susceptible.

[3] Did not qualify for BRD re-treatment, not a BRD mortality and not removed for non-BRD reasons

PHASE IV ALL SPECIES STUDY BOVINE  
 STUDY: A131R-US-13-231  
 TREATMENT SUCCESS RATE  
 SUMMARY OF MIC BY ANIMAL

treatment=T01 test material=DRAXXIN period=First Pull

| animal | microorganism | mic | resistant<br>[1] | susceptible<br>[2] | day<br>of<br>BRD | score | temperature<br>(F) | day of<br>removal | brd<br>related | BRD<br>mortality | treatment<br>success<br>[3] |
|--------|---------------|-----|------------------|--------------------|------------------|-------|--------------------|-------------------|----------------|------------------|-----------------------------|
| 1004   | MH            | >64 | YES              | NO                 |                  |       |                    |                   |                |                  | YES                         |
| 1006   | MH            | >64 | YES              | NO                 |                  |       |                    |                   |                |                  | YES                         |
| 101    | MH            | >64 | YES              | NO                 | 18               | 1     | 103.5              | 18                | BRD            |                  | NO                          |
| 1011   | MH            | >64 | YES              | NO                 |                  |       |                    |                   |                |                  | YES                         |
| 1016   | MH            | >64 | YES              | NO                 | 40               | 3     | 102.4              | 40                | BRD            |                  | NO                          |
|        | PM            | >64 | YES              | NO                 | 40               | 3     | 102.4              | 40                | BRD            |                  | NO                          |
| 1030   | MH            | >64 | YES              | NO                 | 19               | 1     | 105.5              | 19                | BRD            |                  | NO                          |
| 1032   | MH            | >64 | YES              | NO                 |                  |       |                    |                   |                |                  | YES                         |
| 1033   | MH            | >64 | YES              | NO                 |                  |       |                    |                   |                |                  | YES                         |
| 104    | MH            | >64 | YES              | NO                 |                  |       |                    |                   |                |                  | YES                         |
| 112    | PM            | 32  | NO               | NO                 |                  |       |                    |                   |                |                  | YES                         |
| 130    | MH            | >64 | YES              | NO                 | 13               | 3     | 105.9              | 13                | BRD            |                  | NO                          |
| 133    | MH            | >64 | YES              | NO                 |                  |       |                    |                   |                |                  | YES                         |
| 141    | MH            | >64 | YES              | NO                 | 40               | 1     | 106.0              | 40                | BRD            |                  | NO                          |
| 142    | MH            | >64 | YES              | NO                 |                  |       |                    |                   |                |                  | YES                         |
| 159    | MH            | >64 | YES              | NO                 | 36               | 2     | 105.1              | 36                | BRD            |                  | NO                          |
| 163    | MH            | >64 | YES              | NO                 | 18               | 2     | 106.2              | 18                | BRD            |                  | NO                          |
| 164    | PM            | 0.5 | NO               | YES                | 19               | 2     |                    | 20                | BRD            |                  | NO                          |
| 167    | MH            | >64 | YES              | NO                 |                  |       |                    |                   |                |                  | YES                         |
| 179    | MH            | >64 | YES              | NO                 | 35               | 1     | 103.5              | 35                | BRD            |                  | NO                          |
| 181    | MH            | >64 | YES              | NO                 |                  |       |                    |                   |                |                  | YES                         |
| 184    | MH            | 2   | NO               | YES                | 13               | 3     | 107.3              | 13                | BRD            |                  | NO                          |
| 200    | MH            | >64 | YES              | NO                 |                  |       |                    |                   |                |                  | YES                         |
|        | PM            | >64 | YES              | NO                 |                  |       |                    |                   |                |                  | YES                         |
| 201    | MH            | >64 | YES              | NO                 |                  |       |                    |                   |                |                  | YES                         |
| 202    | MH            | >64 | YES              | NO                 |                  |       |                    |                   |                |                  | YES                         |
| 212    | MH            | >64 | YES              | NO                 |                  |       |                    |                   |                |                  | YES                         |
| 221    | MH            | >64 | YES              | NO                 |                  |       |                    |                   |                |                  | YES                         |
| 222    | MH            | >64 | YES              | NO                 |                  |       |                    |                   |                |                  | YES                         |
| 232    | MH            | >64 | YES              | NO                 | 20               | 3     | 105.0              | 20                | BRD            |                  | NO                          |
| 248    | MH            | >64 | YES              | NO                 |                  |       |                    |                   |                |                  | YES                         |

DATA HAVE NOT BEEN VERIFIED

[1] MIC < 64 are non-resistant, MIC >= 64 are resistant.

[2] MIC > 16 are non-susceptible, MIC <= 16 are susceptible.

[3] Did not qualify for BRD re-treatment, not a BRD mortality and not removed for non-BRD reasons

PHASE IV ALL SPECIES STUDY BOVINE  
 STUDY: A131R-US-13-231  
 TREATMENT SUCCESS RATE  
 SUMMARY OF MIC BY ANIMAL

treatment=T01 test material=DRAXXIN period=First Pull

| animal | day of study | day 0 date | day 0 weight (LBS) | histophilus somni | mannheimia haemolytica | mycoplasma bovis | pasteurella multocida | Bovine Parainfluenza 3 (qPCR-BPI3) | Bovine Respiratory Syncytial Virus (qPCR-BRSV-PCR) | Bovine Viral Diarrhea (qPCR-BVD-PCR) | Infectious Bovine Rhinotracheitis (qPCR-IBR-BHV) |
|--------|--------------|------------|--------------------|-------------------|------------------------|------------------|-----------------------|------------------------------------|----------------------------------------------------|--------------------------------------|--------------------------------------------------|
| 250    | 25           | 13MAR15    | 500                | N                 | Y                      | P                | Y                     | Negative                           | Negative                                           | Negative                             | Negative                                         |
|        |              |            | 500                | N                 | Y                      | P                | Y                     | Negative                           | Negative                                           | Negative                             | Negative                                         |
| 255    | 18           | 13MAR15    | 450                | N                 | Y                      | N                | N                     | Positive                           | Positive                                           | Negative                             | Negative                                         |
| 258    | 18           | 13MAR15    | 480                | N                 | N                      | Y                | Y                     | Negative                           | Positive                                           | Negative                             | Negative                                         |
| 264    | 21           | 13MAR15    | 533                | Y                 | Y                      | P                | N                     | Negative                           | Negative                                           | Negative                             | Negative                                         |
| 265    | 20           | 13MAR15    | 435                | N                 | N                      | N                | Y                     | Positive                           | Negative                                           | Negative                             | Negative                                         |
| 266    | 21           | 13MAR15    | 552                | N                 | Y                      | N                | N                     | Negative                           | Negative                                           | Negative                             | Positive                                         |
| 268    | 18           | 13MAR15    | 560                | N                 | Y                      | Y                | N                     | Negative                           | Negative                                           | Negative                             | Negative                                         |
| 271    | 21           | 13MAR15    | 527                | N                 | Y                      | P                | N                     | Negative                           | Negative                                           | Negative                             | Negative                                         |
| 277    | 19           | 13MAR15    | 480                | N                 | Y                      | N                | N                     | Negative                           | Positive                                           | Negative                             | Negative                                         |
| 291    | 13           | 20MAR15    | 480                | N                 | Y                      | P                | N                     | Positive                           | Positive                                           | Positive                             | Positive                                         |
| 311    | 12           | 20MAR15    | 405                | N                 | Y                      | Y                | N                     | Negative                           | Positive                                           | Negative                             | Negative                                         |
| 312    | 18           | 20MAR15    | 484                | N                 | Y                      | N                | N                     | Negative                           | Negative                                           | Negative                             | Negative                                         |
| 315    | 25           | 20MAR15    | 425                | N                 | N                      | P                | Y                     | Negative                           | Negative                                           | Negative                             | Negative                                         |
| 318    | 25           | 20MAR15    | 455                | N                 | Y                      | P                | Y                     | Negative                           | Negative                                           | Negative                             | Negative                                         |
|        |              |            | 455                | N                 | Y                      | P                | Y                     | Negative                           | Negative                                           | Negative                             | Negative                                         |
| 323    | 14           | 20MAR15    | 430                | N                 | Y                      | P                | N                     | Negative                           | Positive                                           | Negative                             | Negative                                         |
| 329    | 15           | 20MAR15    | 465                | N                 | Y                      | N                | N                     | Negative                           | Positive                                           | Negative                             | Negative                                         |
| 343    | 18           | 20MAR15    | 557                | N                 | Y                      | N                | N                     | Negative                           | Positive                                           | Negative                             | Negative                                         |
| 346    | 13           | 20MAR15    | 422                | N                 | N                      | P                | Y                     | Negative                           | Negative                                           | Negative                             | Positive                                         |
| 349    | 16           | 20MAR15    | 441                | N                 | Y                      | P                | N                     | Positive                           | Positive                                           | Negative                             | Negative                                         |
| 365    | 19           | 20MAR15    | 457                | N                 | Y                      | N                | N                     | Negative                           | Positive                                           | Negative                             | Negative                                         |
| 367    | 14           | 20MAR15    | 474                | N                 | Y                      | N                | N                     | Negative                           | Positive                                           | Negative                             | Negative                                         |
| 374    | 13           | 20MAR15    | 475                | N                 | Y                      | P                | N                     | Positive                           | Negative                                           | Negative                             | Negative                                         |
| 377    | 23           | 20MAR15    | 436                | N                 | Y                      | P                | N                     | Negative                           | Negative                                           | Negative                             | Negative                                         |
| 388    | 15           | 20MAR15    | 471                | N                 | Y                      | P                | N                     | Negative                           | Negative                                           | Negative                             | Negative                                         |
| 390    | 16           | 20MAR15    | 573                | N                 | Y                      | P                | N                     | Negative                           | Positive                                           | Negative                             | Negative                                         |
| 391    | 14           | 20MAR15    | 597                | N                 | Y                      | P                | N                     | Negative                           | Positive                                           | Negative                             | Negative                                         |
| 406    | 17           | 20MAR15    | 533                | N                 | Y                      | P                | N                     | Positive                           | Negative                                           | Negative                             | Negative                                         |
| 411    | 12           | 20MAR15    | 538                | N                 | Y                      | Y                | N                     | Negative                           | Positive                                           | Negative                             | Negative                                         |
| 415    | 10           | 20MAR15    | 521                | N                 | Y                      | N                | N                     | Positive                           | Positive                                           | Negative                             | Negative                                         |

DATA HAVE NOT BEEN VERIFIED

[1] MIC < 64 are non-resistant, MIC >= 64 are resistant.

[2] MIC > 16 are non-susceptible, MIC <= 16 are susceptible.

[3] Did not qualify for BRD re-treatment, not a BRD mortality and not removed for non-BRD reasons

PHASE IV ALL SPECIES STUDY BOVINE  
 STUDY: A131R-US-13-231  
 TREATMENT SUCCESS RATE  
 SUMMARY OF MIC BY ANIMAL

treatment=T01 test material=DRAXXIN period=First Pull

| animal | microorganism | mic | resistant<br>[1] | susceptible<br>[2] | day<br>of<br>BRD | score | temperature<br>(F) | day of<br>removal | brd<br>related | BRD<br>mortality | treatment<br>success<br>[3] |
|--------|---------------|-----|------------------|--------------------|------------------|-------|--------------------|-------------------|----------------|------------------|-----------------------------|
| 250    | MH            | >64 | YES              | NO                 |                  |       |                    |                   |                |                  | YES                         |
|        | PM            | 16  | NO               | YES                |                  |       |                    |                   |                |                  | YES                         |
| 255    | MH            | >64 | YES              | NO                 |                  |       |                    |                   |                |                  | YES                         |
| 258    | PM            | 16  | NO               | YES                | 28               | 1     | 103.7              | 28                | BRD            |                  | NO                          |
| 264    | MH            | >64 | YES              | NO                 | 28               | 3     | 105.4              | 28                | BRD            |                  | NO                          |
| 265    | PM            | 32  | NO               | NO                 | 30               | 1     | 104.0              | 30                | BRD            |                  | NO                          |
| 266    | MH            | >64 | YES              | NO                 |                  |       |                    |                   |                |                  | YES                         |
| 268    | MH            | >64 | YES              | NO                 |                  |       |                    |                   |                |                  | YES                         |
| 271    | MH            | >64 | YES              | NO                 | 28               | 2     | 105.1              | 28                | BRD            |                  | NO                          |
| 277    | MH            | >64 | YES              | NO                 |                  |       |                    |                   |                |                  | YES                         |
| 291    | MH            | >64 | YES              | NO                 | 20               | 2     | 104.2              | 20                | BRD            |                  | NO                          |
| 311    | MH            | >64 | YES              | NO                 | 19               | 2     | 105.7              | 19                | BRD            |                  | NO                          |
| 312    | MH            | >64 | YES              | NO                 |                  |       |                    |                   |                |                  | YES                         |
| 315    | PM            | >64 | YES              | NO                 |                  |       |                    |                   |                |                  | YES                         |
| 318    | MH            | >64 | YES              | NO                 | 32               | 1     | 103.8              | 32                | BRD            |                  | NO                          |
|        | PM            | 1   | NO               | YES                | 32               | 1     | 103.8              | 32                | BRD            |                  | NO                          |
| 323    | MH            | >64 | YES              | NO                 |                  |       |                    |                   |                |                  | YES                         |
| 329    | MH            | >64 | YES              | NO                 |                  |       |                    |                   |                |                  | YES                         |
| 343    | MH            | >64 | YES              | NO                 | 26               | 1     | 104.5              | 26                | BRD            |                  | NO                          |
| 346    | PM            | >64 | YES              | NO                 | 23               | 3     | 105.8              | 23                | BRD            |                  | NO                          |
| 349    | MH            | >64 | YES              | NO                 | 27               | 1     | 104.8              | 27                | BRD            |                  | NO                          |
| 365    | MH            | >64 | YES              | NO                 | 27               | 1     | 105.3              | 27                | BRD            |                  | NO                          |
| 367    | MH            | >64 | YES              | NO                 | 17               | 3     | 105.6              | 17                | BRD            |                  | NO                          |
| 374    | MH            | >64 | YES              | NO                 | 15               | 3     | 104.5              | 15                | BRD            | YES              | NO                          |
| 377    | MH            | >64 | YES              | NO                 |                  |       |                    |                   |                |                  | YES                         |
| 388    | MH            | >64 | YES              | NO                 | 19               | 3     | 104.5              | 19                | BRD            |                  | NO                          |
| 390    | MH            | >64 | YES              | NO                 |                  |       |                    |                   |                |                  | YES                         |
| 391    | MH            | >64 | YES              | NO                 | 21               | 2     | 106.0              | 21                | BRD            |                  | NO                          |
| 406    | MH            | >64 | YES              | NO                 |                  |       |                    |                   |                |                  | YES                         |
| 411    | MH            | >64 | YES              | NO                 |                  |       |                    |                   |                |                  | YES                         |
| 415    | MH            | >64 | YES              | NO                 | 17               | 1     | 104.8              | 17                | BRD            |                  | NO                          |

DATA HAVE NOT BEEN VERIFIED

[1] MIC < 64 are non-resistant, MIC >= 64 are resistant.

[2] MIC > 16 are non-susceptible, MIC <= 16 are susceptible.

[3] Did not qualify for BRD re-treatment, not a BRD mortality and not removed for non-BRD reasons

PHASE IV ALL SPECIES STUDY BOVINE  
 STUDY: A131R-US-13-231  
 TREATMENT SUCCESS RATE  
 SUMMARY OF MIC BY ANIMAL

treatment=T01 test material=DRAXXIN period=First Pull

| animal | day of study | day 0 date | day 0 weight (LBS) | histophilus somni | mannheimia haemolytica | mycoplasma bovis | pasteurella multocida | Bovine Parainfluenza 3 (qPCR-BPI3) | Bovine Respiratory Syncytial Virus (qPCR-BRSV-PCR) | Bovine Viral Diarrhea (qPCR-BVD-PCR) | Infectious Bovine Rhinotracheitis (qPCR-IBR-BHV) |
|--------|--------------|------------|--------------------|-------------------|------------------------|------------------|-----------------------|------------------------------------|----------------------------------------------------|--------------------------------------|--------------------------------------------------|
| 416    | 13           | 20MAR15    | 489                | N                 | Y                      | P                | N                     | Negative                           | Positive                                           | Negative                             | Positive                                         |
| 422    | 15           | 20MAR15    | 514                | N                 | Y                      | P                | N                     | Negative                           | Positive                                           | Negative                             | Positive                                         |
| 428    | 14           | 20MAR15    | 515                | N                 | N                      | P                | Y                     | Negative                           | Positive                                           | Negative                             | Negative                                         |
| 433    | 12           | 20MAR15    | 546                | N                 | N                      | Y                | Y                     | Negative                           | Positive                                           | Negative                             | Positive                                         |
| 445    | 12           | 20MAR15    | 551                | N                 | Y                      | N                | N                     | Positive                           | Positive                                           | Negative                             | Negative                                         |
| 452    | 23           | 20MAR15    | 530                | Y                 | N                      | N                | Y                     | Negative                           | Negative                                           | Negative                             | Negative                                         |
| 454    | 11           | 20MAR15    | 523                | Y                 | Y                      | Y                | N                     | Negative                           | Positive                                           | Positive                             | Positive                                         |
| 467    | 21           | 20MAR15    | 560                | N                 | N                      | P                | Y                     | Negative                           | Negative                                           | Negative                             | Negative                                         |
| 471    | 16           | 23MAR15    | 529                | N                 | Y                      | N                | N                     | Positive                           | Positive                                           | Negative                             | Negative                                         |
| 478    | 11           | 23MAR15    | 555                | N                 | Y                      | P                | N                     | Positive                           | Negative                                           | Negative                             | Negative                                         |
| 484    | 14           | 23MAR15    | 537                | N                 | Y                      | N                | N                     | Positive                           | Positive                                           | Negative                             | Negative                                         |
| 486    | 15           | 23MAR15    | 484                | N                 | Y                      | N                | Y                     | Negative                           | Positive                                           | Negative                             | Negative                                         |
|        |              |            | 484                | N                 | Y                      | N                | Y                     | Negative                           | Positive                                           | Negative                             | Negative                                         |
| 487    | 36           | 23MAR15    | 579                | N                 | N                      | P                | Y                     | Negative                           | Negative                                           | Negative                             | Negative                                         |
| 491    | 7            | 23MAR15    | 482                | N                 | Y                      | N                | N                     | Positive                           | Negative                                           | Negative                             | Negative                                         |
| 492    | 10           | 23MAR15    | 537                | N                 | Y                      | P                | N                     | Positive                           | Negative                                           | Negative                             | Positive                                         |
| 505    | 7            | 23MAR15    | 486                | N                 | Y                      | Y                | N                     | Negative                           | Negative                                           | Negative                             | Negative                                         |
| 506    | 15           | 23MAR15    | 539                | N                 | Y                      | P                | N                     | Positive                           | Positive                                           | Negative                             | Negative                                         |
| 509    | 8            | 23MAR15    | 457                | N                 | Y                      | Y                | N                     | Positive                           | Positive                                           | Negative                             | Negative                                         |
| 51     | 10           | 06MAR15    | 514                | N                 | Y                      | Y                | N                     | Negative                           | Negative                                           | Negative                             | Negative                                         |
| 510    | 16           | 23MAR15    | 575                | Y                 | Y                      | P                | N                     | Positive                           | Positive                                           | Negative                             | Negative                                         |
| 512    | 10           | 23MAR15    | 573                | N                 | N                      | P                | Y                     | Negative                           | Negative                                           | Positive                             | Positive                                         |
| 518    | 10           | 23MAR15    | 518                | N                 | Y                      | N                | N                     | Negative                           | Positive                                           | Negative                             | Negative                                         |
| 520    | 7            | 23MAR15    | 545                | N                 | N                      | Y                | Y                     | Negative                           | Positive                                           | Negative                             | Negative                                         |
| 524    | 15           | 23MAR15    | 500                | N                 | Y                      | P                | N                     | Positive                           | Negative                                           | Negative                             | Negative                                         |
| 531    | 15           | 23MAR15    | 490                | N                 | Y                      | P                | N                     | Negative                           | Negative                                           | Negative                             | Negative                                         |
| 537    | 17           | 23MAR15    | 491                | N                 | Y                      | P                | N                     | Negative                           | Positive                                           | Negative                             | Negative                                         |
| 541    | 12           | 23MAR15    | 502                | N                 | Y                      | N                | N                     | Negative                           | Negative                                           | Negative                             | Negative                                         |
| 542    | 19           | 23MAR15    | 473                | N                 | Y                      | P                | Y                     | Negative                           | Negative                                           | Negative                             | Positive                                         |
|        |              |            | 473                | N                 | Y                      | P                | Y                     | Negative                           | Negative                                           | Negative                             | Positive                                         |
| 547    | 36           | 23MAR15    | 433                | N                 | Y                      | N                | N                     | Negative                           | Negative                                           | Negative                             | Negative                                         |

DATA HAVE NOT BEEN VERIFIED

[1] MIC < 64 are non-resistant, MIC >= 64 are resistant.

[2] MIC > 16 are non-susceptible, MIC <= 16 are susceptible.

[3] Did not qualify for BRD re-treatment, not a BRD mortality and not removed for non-BRD reasons



PHASE IV ALL SPECIES STUDY BOVINE  
 STUDY: A131R-US-13-231  
 TREATMENT SUCCESS RATE  
 SUMMARY OF MIC BY ANIMAL

treatment=T01 test material=DRAXXIN period=First Pull

| animal | microorganism | mic | resistant<br>[1] | susceptible<br>[2] | day<br>of<br>BRD | score | temperature<br>(F) | day of<br>removal | brd<br>related | BRD<br>mortality | treatment<br>success<br>[3] |
|--------|---------------|-----|------------------|--------------------|------------------|-------|--------------------|-------------------|----------------|------------------|-----------------------------|
| 416    | MH            | >64 | YES              | NO                 |                  |       |                    |                   |                |                  | YES                         |
| 422    | MH            | >64 | YES              | NO                 | 18               | 3     | 104.5              | 18                | BRD            |                  | NO                          |
| 428    | PM            | 16  | NO               | YES                |                  |       |                    |                   |                |                  | YES                         |
| 433    | PM            | 32  | NO               | NO                 | 15               | 3     | 104.4              | 15                | BRD            |                  | NO                          |
| 445    | MH            | >64 | YES              | NO                 |                  |       |                    |                   |                |                  | YES                         |
| 452    | PM            | 16  | NO               | YES                | 25               | 3     | 106.2              | 25                | BRD            |                  | NO                          |
| 454    | MH            | >64 | YES              | NO                 | 18               | 1     | 103.8              | 18                | BRD            |                  | NO                          |
| 467    | PM            | 8   | NO               | YES                |                  |       |                    |                   |                |                  | YES                         |
| 471    | MH            | >64 | YES              | NO                 | 18               | 3     | 104.1              | 18                | BRD            |                  | NO                          |
| 478    | MH            | >64 | YES              | NO                 | 32               | 2     | 103.8              | 32                | BRD            |                  | NO                          |
| 484    | MH            | >64 | YES              | NO                 |                  |       |                    |                   |                |                  | YES                         |
| 486    | HSPM          | >64 | YES              | NO                 | 18               | 3     | 107.4              | 18                | BRD            |                  | NO                          |
|        | MH            | >64 | YES              | NO                 | 18               | 3     | 107.4              | 18                | BRD            |                  | NO                          |
| 487    | PM            | >64 | YES              | NO                 | 40               | 3     | 105.1              | 40                | BRD            |                  | NO                          |
| 491    | MH            | >64 | YES              | NO                 | 22               | 1     | 105.0              | 22                | BRD            |                  | NO                          |
| 492    | MH            | >64 | YES              | NO                 | 14               | 3     | 104.1              | 14                | BRD            |                  | NO                          |
| 505    | MH            | >64 | YES              | NO                 | 15               | 1     | 103.9              | 15                | BRD            |                  | NO                          |
| 506    | MH            | >64 | YES              | NO                 |                  |       |                    |                   |                |                  | YES                         |
| 509    | MH            | >64 | YES              | NO                 | 21               | 2     | 102.5              | 21                | BRD            |                  | NO                          |
| 51     | MH            | 4   | NO               | YES                | 17               | 2     | 104.6              | 17                | BRD            |                  | NO                          |
| 510    | MH            | >64 | YES              | NO                 | 24               | 1     | 104.0              | 24                | BRD            |                  | NO                          |
| 512    | PM            | >64 | YES              | NO                 |                  |       |                    |                   |                |                  | YES                         |
| 518    | MH            | >64 | YES              | NO                 |                  |       |                    |                   |                |                  | YES                         |
| 520    | PM            | >64 | YES              | NO                 | 15               | 1     | 104.6              | 15                | BRD            |                  | NO                          |
| 524    | MH            | >64 | YES              | NO                 | 22               | 1     | 105.0              | 22                | BRD            |                  | NO                          |
| 531    | MH            | >64 | YES              | NO                 | 22               | 1     | 105.8              | 22                | BRD            |                  | NO                          |
| 537    | MH            | >64 | YES              | NO                 | 22               | 3     | 106.7              | 22                | BRD            |                  | NO                          |
| 541    | MH            | >64 | YES              | NO                 | 19               | 1     | 104.6              | 19                | BRD            |                  | NO                          |
| 542    | MH            | >64 | YES              | NO                 |                  |       |                    |                   |                |                  | YES                         |
|        | PM            | >64 | YES              | NO                 |                  |       |                    |                   |                |                  | YES                         |
| 547    | MH            | >64 | YES              | NO                 |                  |       |                    |                   |                |                  | YES                         |

DATA HAVE NOT BEEN VERIFIED

[1] MIC < 64 are non-resistant, MIC >= 64 are resistant.

[2] MIC > 16 are non-susceptible, MIC <= 16 are susceptible.

[3] Did not qualify for BRD re-treatment, not a BRD mortality and not removed for non-BRD reasons

PHASE IV ALL SPECIES STUDY BOVINE  
 STUDY: A131R-US-13-231  
 TREATMENT SUCCESS RATE  
 SUMMARY OF MIC BY ANIMAL

treatment=T01 test material=DRAXXIN period=First Pull

| animal | day of study | day 0 date | day 0 weight (LBS) | histophilus somni | mannheimia haemolytica | mycoplasma bovis | pasteurella multocida | Bovine Parainfluenza 3 (qPCR-BPI3) | Bovine Respiratory Syncytial Virus (qPCR-BRSV-PCR) | Bovine Viral Diarrhea (qPCR-BVD-PCR) | Infectious Bovine Rhinotracheitis (qPCR-IBR-BHV) |
|--------|--------------|------------|--------------------|-------------------|------------------------|------------------|-----------------------|------------------------------------|----------------------------------------------------|--------------------------------------|--------------------------------------------------|
| 549    | 14           | 23MAR15    | 469                | Y                 | N                      | P                | Y                     | Negative                           | Negative                                           | Negative                             | Negative                                         |
| 564    | 11           | 23MAR15    | 481                | N                 | N                      | N                | Y                     | Negative                           | Positive                                           | Negative                             | Negative                                         |
| 618    | 7            | 23MAR15    | 516                | N                 | Y                      | Y                | N                     | Negative                           | Positive                                           | Positive                             | Negative                                         |
| 62     | 24           | 06MAR15    | 444                | N                 | Y                      | Y                | N                     | Negative                           | Negative                                           | Negative                             | Negative                                         |
| 625    | 11           | 23MAR15    | 497                | N                 | Y                      | N                | N                     | Negative                           | Positive                                           | Negative                             | Negative                                         |
| 644    | 15           | 25MAR15    | 402                | N                 | Y                      | N                | N                     | Negative                           | Negative                                           | Negative                             | Negative                                         |
| 645    | 14           | 25MAR15    | 429                | N                 | N                      | P                | Y                     | Negative                           | Positive                                           | Negative                             | Negative                                         |
| 665    | 20           | 25MAR15    | 437                | N                 | Y                      | P                | N                     | Negative                           | Negative                                           | Negative                             | Negative                                         |
| 675    | 16           | 25MAR15    | 455                | N                 | Y                      | N                | N                     | Negative                           | Positive                                           | Negative                             | Negative                                         |
| 693    | 15           | 25MAR15    | 433                | N                 | Y                      | P                | Y                     | Negative                           | Negative                                           | Negative                             | Negative                                         |
|        |              |            | 433                | N                 | Y                      | P                | Y                     | Negative                           | Negative                                           | Negative                             | Negative                                         |
| 706    | 15           | 25MAR15    | 424                | N                 | Y                      | N                | N                     | Negative                           | Negative                                           | Negative                             | Negative                                         |
| 708    | 16           | 25MAR15    | 407                | N                 | Y                      | N                | N                     | Negative                           | Positive                                           | Negative                             | Negative                                         |
| 712    | 22           | 25MAR15    | 355                | N                 | Y                      | N                | N                     | Negative                           | Negative                                           | Negative                             | Negative                                         |
| 713    | 15           | 25MAR15    | 409                | N                 | Y                      | N                | N                     | Negative                           | Positive                                           | Negative                             | Negative                                         |
| 721    | 15           | 25MAR15    | 412                | N                 | Y                      | N                | N                     | Negative                           | Negative                                           | Negative                             | Negative                                         |
| 737    | 14           | 25MAR15    | 340                | N                 | Y                      | N                | N                     | Positive                           | Positive                                           | Negative                             | Negative                                         |
| 745    | 14           | 25MAR15    | 450                | N                 | Y                      | N                | N                     | Positive                           | Positive                                           | Negative                             | Negative                                         |
| 752    | 14           | 25MAR15    | 434                | N                 | Y                      | P                | N                     | Positive                           | Positive                                           | Negative                             | Negative                                         |
| 753    | 9            | 25MAR15    | 404                | N                 | Y                      | N                | N                     | Negative                           | Negative                                           | Negative                             | Negative                                         |
| 754    | 18           | 25MAR15    | 349                | N                 | Y                      | P                | N                     | Negative                           | Negative                                           | Negative                             | Negative                                         |
| 766    | 18           | 26MAR15    | 485                | N                 | Y                      | N                | N                     | Positive                           | Negative                                           | Negative                             | Negative                                         |
| 772    | 18           | 26MAR15    | 558                | Y                 | Y                      | P                | N                     | Positive                           | Negative                                           | Negative                             | Negative                                         |
| 773    | 10           | 26MAR15    | 454                | N                 | Y                      | N                | N                     | Negative                           | Negative                                           | Positive                             | Positive                                         |
| 775    | 8            | 26MAR15    | 466                | N                 | Y                      | N                | N                     | Negative                           | Positive                                           | Positive                             | Negative                                         |
| 783    | 14           | 26MAR15    | 505                | N                 | Y                      | P                | N                     | Negative                           | Positive                                           | Negative                             | Negative                                         |
| 786    | 17           | 26MAR15    | 499                | N                 | Y                      | P                | N                     | Negative                           | Negative                                           | Negative                             | Negative                                         |
| 793    | 9            | 26MAR15    | 532                | N                 | Y                      | N                | N                     | Negative                           | Positive                                           | Positive                             | Negative                                         |
| 795    | 16           | 26MAR15    | 535                | N                 | Y                      | N                | N                     | Negative                           | Negative                                           | Positive                             | Negative                                         |
| 798    | 8            | 26MAR15    | 545                | N                 | Y                      | N                | Y                     | Negative                           | Positive                                           | Negative                             | Positive                                         |
|        |              |            | 545                | N                 | Y                      | N                | Y                     | Negative                           | Positive                                           | Negative                             | Positive                                         |

DATA HAVE NOT BEEN VERIFIED

[1] MIC < 64 are non-resistant, MIC >= 64 are resistant.

[2] MIC > 16 are non-susceptible, MIC <= 16 are susceptible.

[3] Did not qualify for BRD re-treatment, not a BRD mortality and not removed for non-BRD reasons

PHASE IV ALL SPECIES STUDY BOVINE  
 STUDY: A131R-US-13-231  
 TREATMENT SUCCESS RATE  
 SUMMARY OF MIC BY ANIMAL

treatment=T01 test material=DRAXXIN period=First Pull

| animal | microorganism | mic | resistant<br>[1] | susceptible<br>[2] | day<br>of<br>BRD | score | temperature<br>(F) | day of<br>removal | brd<br>related | BRD<br>mortality | treatment<br>success<br>[3] |
|--------|---------------|-----|------------------|--------------------|------------------|-------|--------------------|-------------------|----------------|------------------|-----------------------------|
| 549    | PM            | >64 | YES              | NO                 | 29               | 1     | 104.5              | 29                | BRD            |                  | NO                          |
| 564    | PM            | 0.5 | NO               | YES                |                  |       |                    |                   |                |                  | YES                         |
| 618    | MH            | 32  | NO               | NO                 |                  |       |                    |                   |                |                  | YES                         |
| 62     | MH            | >64 | YES              | NO                 |                  |       |                    |                   |                |                  | YES                         |
| 625    | MH            | 32  | NO               | NO                 |                  |       |                    |                   |                |                  | YES                         |
| 644    | MH            | >64 | YES              | NO                 | 22               | 1     | 103.7              | 22                | BRD            |                  | NO                          |
| 645    | PM            | 0.5 | NO               | YES                |                  |       |                    |                   |                |                  | YES                         |
| 665    | MH            | >64 | YES              | NO                 |                  |       |                    |                   |                |                  | YES                         |
| 675    | MH            | >64 | YES              | NO                 |                  |       |                    |                   |                |                  | YES                         |
| 693    | MH            | >64 | YES              | NO                 | 22               | 2     | 103.7              | 22                | BRD            |                  | NO                          |
|        | PM            | 0.5 | NO               | YES                | 22               | 2     | 103.7              | 22                | BRD            |                  | NO                          |
| 706    | MH            | >64 | YES              | NO                 | 22               | 3     | 106.8              | 22                | BRD            |                  | NO                          |
| 708    | MH            | >64 | YES              | NO                 |                  |       |                    |                   |                |                  | YES                         |
| 712    | MH            | >64 | YES              | NO                 |                  |       |                    |                   |                |                  | YES                         |
| 713    | MH            | >64 | YES              | NO                 | 22               | 1     | 105.4              | 22                | BRD            |                  | NO                          |
| 721    | MH            | >64 | YES              | NO                 | 22               | 2     | 105.0              | 22                | BRD            |                  | NO                          |
| 737    | MH            | >64 | YES              | NO                 |                  |       |                    |                   |                |                  | YES                         |
| 745    | MH            | >64 | YES              | NO                 |                  |       |                    |                   |                |                  | YES                         |
| 752    | MH            | >64 | YES              | NO                 | 24               | 1     | 103.7              | 24                | BRD            |                  | NO                          |
| 753    | MH            | >64 | YES              | NO                 |                  |       |                    |                   |                |                  | YES                         |
| 754    | MH            | >64 | YES              | NO                 |                  |       |                    |                   |                |                  | YES                         |
| 766    | MH            | >64 | YES              | NO                 |                  |       |                    |                   |                |                  | YES                         |
| 772    | MH            | 32  | NO               | NO                 | 25               | 2     | 103.8              | 25                | BRD            |                  | NO                          |
| 773    | MH            | >64 | YES              | NO                 |                  |       |                    |                   |                |                  | YES                         |
| 775    | MH            | >64 | YES              | NO                 | 12               | 3     | 106.0              | 12                | BRD            |                  | NO                          |
| 783    | MH            | >64 | YES              | NO                 | 21               | 1     | 106.0              | 21                | BRD            |                  | NO                          |
| 786    | MH            | >64 | YES              | NO                 | 33               | 2     | 103.2              | 33                | BRD            |                  | NO                          |
| 793    | MH            | >64 | YES              | NO                 |                  |       |                    |                   |                |                  | YES                         |
| 795    | MH            | >64 | YES              | NO                 |                  |       |                    |                   |                |                  | YES                         |
| 798    | MH            | >64 | YES              | NO                 | 24               | 1     | 103.6              | 24                | BRD            |                  | NO                          |
|        | PM            | 32  | NO               | NO                 | 24               | 1     | 103.6              | 24                | BRD            |                  | NO                          |

DATA HAVE NOT BEEN VERIFIED

[1] MIC < 64 are non-resistant, MIC >= 64 are resistant.

[2] MIC > 16 are non-susceptible, MIC <= 16 are susceptible.

[3] Did not qualify for BRD re-treatment, not a BRD mortality and not removed for non-BRD reasons

PHASE IV ALL SPECIES STUDY BOVINE  
 STUDY: A131R-US-13-231  
 TREATMENT SUCCESS RATE  
 SUMMARY OF MIC BY ANIMAL

treatment=T01 test material=DRAXXIN period=First Pull

| animal | day of study | day 0 date | day 0 weight (LBS) | histophilus somni | mannheimia haemolytica | mycoplasma bovis | pasteurella multocida | Bovine Parainfluenza 3 (qPCR-BPI3) | Bovine Respiratory Syncytial Virus (qPCR-BRSV-PCR) | Bovine Viral Diarrhea (qPCR-BVD-PCR) | Infectious Bovine Rhinotracheitis (qPCR-IBR-BHV) |
|--------|--------------|------------|--------------------|-------------------|------------------------|------------------|-----------------------|------------------------------------|----------------------------------------------------|--------------------------------------|--------------------------------------------------|
| 8      | 14           | 06MAR15    | 522                | Y                 | N                      | N                | Y                     | Positive                           | Positive                                           | Positive                             | Negative                                         |
| 800    | 12           | 26MAR15    | 510                | N                 | Y                      | N                | N                     | Positive                           | Negative                                           | Negative                             | Negative                                         |
| 836    | 19           | 26MAR15    | 443                | N                 | Y                      | P                | N                     | Negative                           | Negative                                           | Negative                             | Negative                                         |
| 838    | 14           | 26MAR15    | 501                | N                 | Y                      | N                | N                     | Negative                           | Positive                                           | Negative                             | Positive                                         |
| 842    | 12           | 26MAR15    | 442                | N                 | Y                      | N                | N                     | Positive                           | Positive                                           | Negative                             | Negative                                         |
| 855    | 32           | 27MAR15    | 522                | N                 | Y                      | N                | Y                     | Negative                           | Negative                                           | Negative                             | Negative                                         |
|        |              |            | 522                | N                 | Y                      | N                | Y                     | Negative                           | Negative                                           | Negative                             | Negative                                         |
| 856    | 7            | 27MAR15    | 530                | N                 | Y                      | N                | N                     | Negative                           | Negative                                           | Negative                             | Negative                                         |
| 868    | 7            | 27MAR15    | 560                | N                 | Y                      | P                | N                     | Negative                           | Negative                                           | Positive                             | Negative                                         |
| 87     | 19           | 06MAR15    | 444                | N                 | Y                      | Y                | N                     | Negative                           | Negative                                           | Positive                             | Negative                                         |
| 872    | 7            | 27MAR15    | 534                | N                 | Y                      | N                | N                     | Positive                           | Negative                                           | Negative                             | Negative                                         |
| 873    | 10           | 27MAR15    | 538                | N                 | Y                      | P                | N                     | Negative                           | Positive                                           | Positive                             | Negative                                         |
| 874    | 7            | 27MAR15    | 563                | N                 | Y                      | P                | N                     | Positive                           | Positive                                           | Negative                             | Negative                                         |
| 876    | 25           | 27MAR15    | 538                | N                 | Y                      | P                | Y                     | Negative                           | Negative                                           | Negative                             | Negative                                         |
|        |              |            | 538                | N                 | Y                      | P                | Y                     | Negative                           | Negative                                           | Negative                             | Negative                                         |
| 877    | 9            | 27MAR15    | 542                | N                 | Y                      | N                | N                     | Positive                           | Positive                                           | Negative                             | Negative                                         |
| 878    | 18           | 27MAR15    | 475                | N                 | N                      | N                | Y                     | Negative                           | Negative                                           | Negative                             | Negative                                         |
| 88     | 18           | 06MAR15    | 479                | N                 | Y                      | Y                | N                     | Positive                           | Positive                                           | Positive                             | Positive                                         |
| 888    | 12           | 27MAR15    | 483                | N                 | Y                      | N                | N                     | Positive                           | Positive                                           | Positive                             | Negative                                         |
| 893    | 26           | 27MAR15    | 554                | Y                 | Y                      | P                | N                     | Negative                           | Negative                                           | Negative                             | Negative                                         |
| 896    | 32           | 27MAR15    | 582                | N                 | N                      | N                | Y                     | Negative                           | Negative                                           | Negative                             | Negative                                         |
| 898    | 8            | 27MAR15    | 519                | N                 | Y                      | N                | N                     | Negative                           | Positive                                           | Negative                             | Negative                                         |
| 907    | 33           | 27MAR15    | 575                | Y                 | N                      | P                | Y                     | Negative                           | Negative                                           | Negative                             | Negative                                         |
| 915    | 20           | 27MAR15    | 441                | N                 | Y                      | N                | N                     | Negative                           | Negative                                           | Negative                             | Negative                                         |
| 931    | 29           | 27MAR15    | 510                | Y                 | Y                      | P                | N                     | Negative                           | Negative                                           | Negative                             | Negative                                         |
| 934    | 11           | 27MAR15    | 518                | N                 | Y                      | N                | N                     | Positive                           | Positive                                           | Negative                             | Negative                                         |
| 942    | 11           | 28MAR15    | 449                | N                 | Y                      | N                | Y                     | Positive                           | Positive                                           | Negative                             | Positive                                         |
|        |              |            | 449                | N                 | Y                      | N                | Y                     | Positive                           | Positive                                           | Negative                             | Positive                                         |
| 944    | 11           | 28MAR15    | 440                | N                 | Y                      | N                | N                     | Positive                           | Positive                                           | Positive                             | Negative                                         |
| 950    | 12           | 28MAR15    | 454                | N                 | Y                      | P                | N                     | Negative                           | Negative                                           | Negative                             | Negative                                         |
| 951    | 11           | 28MAR15    | 448                | N                 | Y                      | P                | N                     | Positive                           | Positive                                           | Negative                             | Negative                                         |

DATA HAVE NOT BEEN VERIFIED

[1] MIC < 64 are non-resistant, MIC >= 64 are resistant.

[2] MIC > 16 are non-susceptible, MIC <= 16 are susceptible.

[3] Did not qualify for BRD re-treatment, not a BRD mortality and not removed for non-BRD reasons

PHASE IV ALL SPECIES STUDY BOVINE  
 STUDY: A131R-US-13-231  
 TREATMENT SUCCESS RATE  
 SUMMARY OF MIC BY ANIMAL

09:30 Tuesday, October 27, 2015 100

treatment=T01 test material=DRAXXIN period=First Pull

| animal | microorganism | mic | resistant<br>[1] | susceptible<br>[2] | day<br>of<br>BRD | score | temperature<br>(F) | day of<br>removal | brd<br>related | BRD<br>mortality | treatment<br>success<br>[3] |
|--------|---------------|-----|------------------|--------------------|------------------|-------|--------------------|-------------------|----------------|------------------|-----------------------------|
| 8      | PM            | >64 | YES              | NO                 |                  |       |                    |                   |                |                  | YES                         |
| 800    | MH            | >64 | YES              | NO                 |                  |       |                    |                   |                |                  | YES                         |
| 836    | MH            | >64 | YES              | NO                 | 28               | 2     | 105.2              | 28                | BRD            |                  | NO                          |
| 838    | MH            | >64 | YES              | NO                 | 21               | 1     | 103.7              | 21                | BRD            |                  | NO                          |
| 842    | MH            | >64 | YES              | NO                 |                  |       |                    |                   |                |                  | YES                         |
| 855    | MH            | >64 | YES              | NO                 |                  |       |                    |                   |                |                  | YES                         |
|        | PM            | >64 | YES              | NO                 |                  |       |                    |                   |                |                  | YES                         |
| 856    | MH            | >64 | YES              | NO                 |                  |       |                    |                   |                |                  | YES                         |
| 868    | MH            | >64 | YES              | NO                 | 10               | 4     | 104.8              | 10                | BRD            | YES              | NO                          |
| 87     | MH            | >64 | YES              | NO                 |                  |       |                    |                   |                |                  | YES                         |
| 872    | MH            | >64 | YES              | NO                 |                  |       |                    |                   |                |                  | YES                         |
| 873    | MH            | >64 | YES              | NO                 | 12               | 3     | 106.9              | 12                | BRD            |                  | NO                          |
| 874    | MH            | >64 | YES              | NO                 | 10               | 3     | 105.9              | 10                | BRD            |                  | NO                          |
| 876    | MH            | >64 | YES              | NO                 | 40               | 1     | 104.2              | 40                | BRD            |                  | NO                          |
|        | PM            | >64 | YES              | NO                 | 40               | 1     | 104.2              | 40                | BRD            |                  | NO                          |
| 877    | MH            | >64 | YES              | NO                 | 19               | 1     | 105.3              | 19                | BRD            |                  | NO                          |
| 878    | PM            | >64 | YES              | NO                 |                  |       |                    |                   |                |                  | YES                         |
| 88     | MH            | 4   | NO               | YES                | 20               | 3     | 101.7              | 20                | BRD            |                  | NO                          |
| 888    | MH            | >64 | YES              | NO                 | 19               | 2     | 106.7              | 19                | BRD            |                  | NO                          |
| 893    | MH            | >64 | YES              | NO                 | 33               | 1     | 103.6              | 33                | BRD            |                  | NO                          |
| 896    | PM            | >64 | YES              | NO                 | 40               | 1     | 103.5              | 40                | BRD            |                  | NO                          |
| 898    | MH            | >64 | YES              | NO                 |                  |       |                    |                   |                |                  | YES                         |
| 907    | PM            | 16  | NO               | YES                |                  |       |                    |                   |                |                  | YES                         |
| 915    | MH            | >64 | YES              | NO                 | 37               | 1     | 104.9              | 37                | BRD            |                  | NO                          |
| 931    | MH            | >64 | YES              | NO                 |                  |       |                    |                   |                |                  | YES                         |
| 934    | MH            | >64 | YES              | NO                 |                  |       |                    |                   |                |                  | YES                         |
| 942    | MH            | >64 | YES              | NO                 | 13               | 3     | 105.8              | 13                | BRD            |                  | NO                          |
|        | PM            | >64 | YES              | NO                 | 13               | 3     | 105.8              | 13                | BRD            |                  | NO                          |
| 944    | MH            | >64 | YES              | NO                 |                  |       |                    |                   |                |                  | YES                         |
| 950    | MH            | >64 | YES              | NO                 | 19               | 1     | 104.8              | 19                | BRD            |                  | NO                          |
| 951    | MH            | >64 | YES              | NO                 | 21               | 3     | 106.4              | 21                | BRD            |                  | NO                          |

DATA HAVE NOT BEEN VERIFIED

[1] MIC < 64 are non-resistant, MIC >= 64 are resistant.

[2] MIC > 16 are non-susceptible, MIC <= 16 are susceptible.

[3] Did not qualify for BRD re-treatment, not a BRD mortality and not removed for non-BRD reasons

PHASE IV ALL SPECIES STUDY BOVINE  
 STUDY: A131R-US-13-231  
 TREATMENT SUCCESS RATE  
 SUMMARY OF MIC BY ANIMAL

09:30 Tuesday, October 27, 2015 101

treatment=T01 test material=DRAXXIN period=First Pull

| animal | day of study | day 0 date | day 0 weight (LBS) | histophilus somni | mannheimia haemolytica | mycoplasma bovis | pasteurella multocida | Bovine Parainfluenza 3 (qPCR-BPI3) | Bovine Respiratory Syncytial Virus (qPCR-BRSV-PCR) | Bovine Viral Diarrhea (qPCR-BVD-PCR) | Infectious Bovine Rhinotracheitis (qPCR-IBR-BHV) |
|--------|--------------|------------|--------------------|-------------------|------------------------|------------------|-----------------------|------------------------------------|----------------------------------------------------|--------------------------------------|--------------------------------------------------|
| 953    | 7            | 28MAR15    | 488                | N                 | Y                      | N                | N                     | Negative                           | Positive                                           | Negative                             | Positive                                         |
| 956    | 12           | 28MAR15    | 509                | N                 | Y                      | P                | N                     | Negative                           | Negative                                           | Positive                             | Negative                                         |
| 962    | 17           | 28MAR15    | 446                | N                 | Y                      | P                | N                     | Negative                           | Negative                                           | Negative                             | Negative                                         |
| 964    | 31           | 28MAR15    | 438                | N                 | Y                      | P                | N                     | Negative                           | Negative                                           | Negative                             | Negative                                         |
| 970    | 37           | 28MAR15    | 465                | N                 | Y                      |                  | Y                     | Negative                           | Positive                                           | Negative                             | Negative                                         |
|        |              |            | 465                | N                 | Y                      |                  | Y                     | Negative                           | Positive                                           | Negative                             | Negative                                         |
| 972    | 17           | 28MAR15    | 489                | N                 | Y                      | P                | N                     | Negative                           | Negative                                           | Negative                             | Negative                                         |
| 973    | 14           | 28MAR15    | 417                | N                 | Y                      | N                | N                     | Positive                           | Positive                                           | Positive                             | Negative                                         |
| 98     | 10           | 13MAR15    | 533                | N                 | Y                      | Y                | N                     | Positive                           | Positive                                           | Positive                             | Positive                                         |
| 983    | 16           | 28MAR15    | 475                | N                 | Y                      | N                | N                     | Negative                           | Negative                                           | Negative                             | Negative                                         |
| 987    | 21           | 28MAR15    | 431                | N                 | Y                      | N                | N                     | Negative                           | Positive                                           | Negative                             | Negative                                         |
| 989    | 8            | 28MAR15    | 382                | N                 | Y                      | N                | N                     | Negative                           | Positive                                           | Negative                             | Negative                                         |
| 996    | 10           | 28MAR15    | 536                | N                 | Y                      | P                | N                     | Negative                           | Positive                                           | Positive                             | Negative                                         |

DATA HAVE NOT BEEN VERIFIED

[1] MIC < 64 are non-resistant, MIC >= 64 are resistant.

[2] MIC > 16 are non-susceptible, MIC <= 16 are susceptible.

[3] Did not qualify for BRD re-treatment, not a BRD mortality and not removed for non-BRD reasons

PHASE IV ALL SPECIES STUDY BOVINE  
 STUDY: A131R-US-13-231  
 TREATMENT SUCCESS RATE  
 SUMMARY OF MIC BY ANIMAL

09:30 Tuesday, October 27, 2015 102

treatment=T01 test material=DRAXXIN period=First Pull

| animal | microorganism | mic  | resistant<br>[1] | susceptible<br>[2] | day<br>of<br>BRD | score | temperature<br>(F) | day of<br>removal | brd<br>related | BRD<br>mortality | treatment<br>success<br>[3] |
|--------|---------------|------|------------------|--------------------|------------------|-------|--------------------|-------------------|----------------|------------------|-----------------------------|
| 953    | MH            | >64  | YES              | NO                 | 18               | 2     | 104.5              | 18                | BRD            |                  | NO                          |
| 956    | MH            | >64  | YES              | NO                 | 15               | 3     | 107.4              | 15                | BRD            |                  | NO                          |
| 962    | MH            | >64  | YES              | NO                 |                  |       |                    |                   |                |                  | YES                         |
| 964    | MH            | >64  | YES              | NO                 |                  |       |                    |                   |                |                  | YES                         |
| 970    | MH            | >64  | YES              | NO                 |                  |       |                    |                   |                |                  | YES                         |
|        | PM            | 0.25 | NO               | YES                |                  |       |                    |                   |                |                  | YES                         |
| 972    | MH            | >64  | YES              | NO                 | 27               | 2     | 104.8              | 27                | BRD            |                  | NO                          |
| 973    | MH            | >64  | YES              | NO                 | 21               | 2     | 104.7              | 21                | BRD            |                  | NO                          |
| 98     | MH            | >64  | YES              | NO                 | 17               | 1     | 105.3              | 17                | BRD            |                  | NO                          |
| 983    | MH            | >64  | YES              | NO                 |                  |       |                    |                   |                |                  | YES                         |
| 987    | MH            | >64  | YES              | NO                 |                  |       |                    |                   |                |                  | YES                         |
| 989    | MH            | >64  | YES              | NO                 | 13               | 3     | 105.2              | 13                | BRD            |                  | NO                          |
| 996    | MH            | >64  | YES              | NO                 |                  |       |                    |                   |                |                  | YES                         |

DATA HAVE NOT BEEN VERIFIED

[1] MIC < 64 are non-resistant, MIC >= 64 are resistant.

[2] MIC > 16 are non-susceptible, MIC <= 16 are susceptible.

[3] Did not qualify for BRD re-treatment, not a BRD mortality and not removed for non-BRD reasons

**PHASE IV ALL SPECIES STUDY BOVINE**  
**STUDY: A131R-US-13-231**  
**TREATMENT SUCCESS RATE**  
**SUMMARY BY RESISTANCE OF BACTERIAL ISOLATES AND PERIOD**

treatment=T01 test material=DRAXXIN

|            |               |           | treatment success |      |     |       | ALL |
|------------|---------------|-----------|-------------------|------|-----|-------|-----|
|            |               |           | NO                |      | YES |       |     |
|            |               |           | n                 | %    | n   | %     | n   |
| period     | microorganism | resistant |                   |      |     |       |     |
| Arrival    | MH            | NO        | 54                | 49.1 | 56  | 50.9  | 110 |
|            |               | YES       | 1                 | 50.0 | 1   | 50.0  | 2   |
|            |               | ALL       | 55                | 49.1 | 57  | 50.9  | 112 |
|            | PM            | resistant |                   |      |     |       |     |
|            |               | NO        | 45                | 42.9 | 60  | 57.1  | 105 |
|            |               | YES       | 0                 | 0    | 2   | 100.0 | 2   |
|            |               | ALL       | 45                | 42.1 | 62  | 57.9  | 107 |
| First Pull | MH            | resistant |                   |      |     |       |     |
|            |               | NO        | 4                 | 66.7 | 2   | 33.3  | 6   |
|            |               | YES       | 65                | 50.0 | 65  | 50.0  | 130 |
|            |               | ALL       | 69                | 50.7 | 67  | 49.3  | 136 |
|            | PM            | resistant |                   |      |     |       |     |
|            |               | NO        | 8                 | 50.0 | 8   | 50.0  | 16  |
|            |               | YES       | 9                 | 56.3 | 7   | 43.8  | 16  |
|            |               | ALL       | 17                | 53.1 | 15  | 46.9  | 32  |



STUDY: A131R-US-13-231

TREATMENT SUCCESS RATE

SUMMARY BY RESISTANCE OF BACTERIAL ISOLATES AND PERIOD  
 SENSITIVITY, SPECIFICITY, POSITIVE PREDICTIVE VALUE AND NEGATIVE PREDICTIVE VALUE

treatment=T01 test material=DRAXXIN

| period     | microorganism | sensitivity | specificity | positive predictive value | negative predictive value |
|------------|---------------|-------------|-------------|---------------------------|---------------------------|
| Arrival    | MH            | 0.018       | 0.982       | 0.500                     | 0.509                     |
|            | PM            | 0.000       | 0.968       | 0.000                     | 0.571                     |
| First Pull | MH            | 0.942       | 0.030       | 0.500                     | 0.333                     |
|            | PM            | 0.529       | 0.533       | 0.563                     | 0.500                     |

SUMMARY BY TIME OF ARRIVAL ON STUDY, RESISTANCE OF BACTERIAL ISOLATES AND PERIOD

treatment=T01 test material=DRAXXIN

|         |            |           | microorganism     |       |     |       |     |                   |      |     |       |     |
|---------|------------|-----------|-------------------|-------|-----|-------|-----|-------------------|------|-----|-------|-----|
|         |            |           | MH                |       |     |       |     | PM                |      |     |       |     |
|         |            |           | treatment success |       |     |       |     | treatment success |      |     |       |     |
|         |            |           | NO                |       | YES |       | ALL | NO                |      | YES |       | ALL |
|         |            |           | n                 | %     | n   | %     | n   | n                 | %    | n   | %     | n   |
| period  | day 0 date | resistant |                   |       |     |       |     |                   |      |     |       |     |
| Arrival | 06MAR15    | NO        | 6                 | 66.7  | 3   | 33.3  | 9   | 9                 | 64.3 | 5   | 35.7  | 14  |
|         |            | ALL       | 6                 | 66.7  | 3   | 33.3  | 9   | 9                 | 64.3 | 5   | 35.7  | 14  |
|         | 13MAR15    | resistant |                   |       |     |       |     |                   |      |     |       |     |
|         |            | NO        | 18                | 54.5  | 15  | 45.5  | 33  | 12                | 48.0 | 13  | 52.0  | 25  |
|         |            | ALL       | 18                | 54.5  | 15  | 45.5  | 33  | 12                | 48.0 | 13  | 52.0  | 25  |
|         | 20MAR15    | resistant |                   |       |     |       |     |                   |      |     |       |     |
|         |            | NO        | 2                 | 28.6  | 5   | 71.4  | 7   | 6                 | 30.0 | 14  | 70.0  | 20  |
|         |            | YES       | 1                 | 100.0 | 0   | 0     | 1   | 0                 | 0    | 0   | 0     | 0   |
|         |            | ALL       | 3                 | 37.5  | 5   | 62.5  | 8   | 6                 | 30.0 | 14  | 70.0  | 20  |
|         | 23MAR15    | resistant |                   |       |     |       |     |                   |      |     |       |     |
|         |            | NO        | 22                | 52.4  | 20  | 47.6  | 42  | 13                | 46.4 | 15  | 53.6  | 28  |
|         |            | YES       | 0                 | 0     | 0   | 0     | 0   | 0                 | 0    | 1   | 100.0 | 1   |
|         |            | ALL       | 22                | 52.4  | 20  | 47.6  | 42  | 13                | 44.8 | 16  | 55.2  | 29  |
|         | 25MAR15    | resistant |                   |       |     |       |     |                   |      |     |       |     |
|         |            | NO        | 0                 | 0     | 4   | 100.0 | 4   | 1                 | 14.3 | 6   | 85.7  | 7   |
|         |            | ALL       | 0                 | 0     | 4   | 100.0 | 4   | 1                 | 14.3 | 6   | 85.7  | 7   |
|         | 26MAR15    | resistant |                   |       |     |       |     |                   |      |     |       |     |
|         |            | NO        | 0                 | 0     | 3   | 100.0 | 3   | 1                 | 25.0 | 3   | 75.0  | 4   |
|         |            | YES       | 0                 | 0     | 0   | 0     | 0   | 0                 | 0    | 1   | 100.0 | 1   |
|         |            | ALL       | 0                 | 0     | 3   | 100.0 | 3   | 1                 | 20.0 | 4   | 80.0  | 5   |
|         | 27MAR15    | resistant |                   |       |     |       |     |                   |      |     |       |     |
|         |            | NO        | 1                 | 25.0  | 3   | 75.0  | 4   | 2                 | 66.7 | 1   | 33.3  | 3   |
|         |            | YES       | 0                 | 0     | 1   | 100.0 | 1   | 0                 | 0    | 0   | 0     | 0   |

(Continued)

SUMMARY BY TIME OF ARRIVAL ON STUDY, RESISTANCE OF BACTERIAL ISOLATES AND PERIOD

treatment=T01 test material=DRAXXIN

|            |            |           | microorganism     |       |      |       |     |                   |      |     |       |     |
|------------|------------|-----------|-------------------|-------|------|-------|-----|-------------------|------|-----|-------|-----|
|            |            |           | MH                |       |      |       |     | PM                |      |     |       |     |
|            |            |           | treatment success |       |      |       |     | treatment success |      |     |       |     |
|            |            |           | NO                |       | YES  |       | ALL | NO                |      | YES |       | ALL |
|            |            |           | n                 | %     | n    | %     | n   | n                 | %    | n   | %     | n   |
| period     | day 0 date | resistant |                   |       |      |       |     |                   |      |     |       |     |
| Arrival    | 27MAR15    | ALL       | 1                 | 20.0  | 4    | 80.0  | 5   | 2                 | 66.7 | 1   | 33.3  | 3   |
|            | 28MAR15    | resistant |                   |       |      |       |     |                   |      |     |       |     |
|            |            | NO        | 5                 | 62.5  | 3    | 37.5  | 8   | 1                 | 25.0 | 3   | 75.0  | 4   |
|            |            | ALL       | 5                 | 62.5  | 3    | 37.5  | 8   | 1                 | 25.0 | 3   | 75.0  | 4   |
| First Pull | 06MAR15    | resistant |                   |       |      |       |     |                   |      |     |       |     |
|            |            | NO        | 2                 | 100.0 | 0    | 0     | 2   | 0                 | 0    | 0   | 0     | 0   |
|            |            | YES       | 0                 | 0     | 2    | 100.0 | 2   | 0                 | 0    | 1   | 100.0 | 1   |
|            |            | ALL       | 2                 | 50.0  | 2    | 50.0  | 4   | 0                 | 0    | 1   | 100.0 | 1   |
|            | 13MAR15    | resistant |                   |       |      |       |     |                   |      |     |       |     |
|            |            | NO        | 1                 | 100.0 | 0    | 0     | 1   | 3                 | 60.0 | 2   | 40.0  | 5   |
|            |            | YES       | 10                | 37.0  | 17   | 63.0  | 27  | 0                 | 0    | 1   | 100.0 | 1   |
|            |            | ALL       | 11                | 39.3  | 17   | 60.7  | 28  | 3                 | 50.0 | 3   | 50.0  | 6   |
|            | 20MAR15    | resistant |                   |       |      |       |     |                   |      |     |       |     |
|            |            | NO        | 0                 | 0     | 0    | 0     | 0   | 3                 | 60.0 | 2   | 40.0  | 5   |
|            |            | YES       | 13                | 59.1  | 9    | 40.9  | 22  | 1                 | 50.0 | 1   | 50.0  | 2   |
|            |            | ALL       | 13                | 59.1  | 9    | 40.9  | 22  | 4                 | 57.1 | 3   | 42.9  | 7   |
|            | 23MAR15    | resistant |                   |       |      |       |     |                   |      |     |       |     |
|            |            | NO        | 0                 | 0     | 2    | 100.0 | 2   | 0                 | 0    | 1   | 100.0 | 1   |
|            |            | YES       | 12                | 70.6  | 5    | 29.4  | 17  | 4                 | 66.7 | 2   | 33.3  | 6   |
|            |            | ALL       | 12                | 63.2  | 7    | 36.8  | 19  | 4                 | 57.1 | 3   | 42.9  | 7   |
|            | 25MAR15    | resistant |                   |       |      |       |     |                   |      |     |       |     |
|            |            | NO        | 0                 | 0     | 0    | 0     | 0   | 1                 | 50.0 | 1   | 50.0  | 2   |
| YES        |            | 6         | 42.9              | 8     | 57.1 | 14    | 0   | 0                 | 0    | 0   | 0     |     |

(Continued)

STUDY: A131R-US-13-231

TREATMENT SUCCESS RATE

SUMMARY BY TIME OF ARRIVAL ON STUDY, RESISTANCE OF BACTERIAL ISOLATES AND PERIOD

treatment=T01 test material=DRAXXIN

|            |            |           | microorganism     |       |     |      |     |                   |       |     |       |     |
|------------|------------|-----------|-------------------|-------|-----|------|-----|-------------------|-------|-----|-------|-----|
|            |            |           | MH                |       |     |      |     | PM                |       |     |       |     |
|            |            |           | treatment success |       |     |      |     | treatment success |       |     |       |     |
|            |            |           | NO                |       | YES |      | ALL | NO                |       | YES |       | ALL |
|            |            |           | n                 | %     | n   | %    | n   | n                 | %     | n   | %     | n   |
| period     | day 0 date | resistant |                   |       |     |      |     |                   |       |     |       |     |
| First Pull | 25MAR15    | ALL       | 6                 | 42.9  | 8   | 57.1 | 14  | 1                 | 50.0  | 1   | 50.0  | 2   |
|            | 26MAR15    | resistant |                   |       |     |      |     |                   |       |     |       |     |
|            |            | NO        | 1                 | 100.0 | 0   | 0    | 1   | 1                 | 100.0 | 0   | 0     | 1   |
|            |            | YES       | 6                 | 50.0  | 6   | 50.0 | 12  | 0                 | 0     | 0   | 0     | 0   |
|            |            | ALL       | 7                 | 53.8  | 6   | 46.2 | 13  | 1                 | 100.0 | 0   | 0     | 1   |
|            | 27MAR15    | resistant |                   |       |     |      |     |                   |       |     |       |     |
|            |            | NO        | 0                 | 0     | 0   | 0    | 0   | 0                 | 0     | 1   | 100.0 | 1   |
|            |            | YES       | 8                 | 57.1  | 6   | 42.9 | 14  | 2                 | 50.0  | 2   | 50.0  | 4   |
|            |            | ALL       | 8                 | 57.1  | 6   | 42.9 | 14  | 2                 | 40.0  | 3   | 60.0  | 5   |
|            | 28MAR15    | resistant |                   |       |     |      |     |                   |       |     |       |     |
|            |            | NO        | 0                 | 0     | 0   | 0    | 0   | 0                 | 0     | 1   | 100.0 | 1   |
|            |            | YES       | 10                | 45.5  | 12  | 54.5 | 22  | 2                 | 100.0 | 0   | 0     | 2   |
|            |            | ALL       | 10                | 45.5  | 12  | 54.5 | 22  | 2                 | 66.7  | 1   | 33.3  | 3   |

SUMMARY BY VIRAL EXPOSURE AND RESISTANCE OF BACTERIAL ISOLATES AT FIRST PULL

treatment=T01 test material=DRAXXIN

|            |                                    |           | microorganism     |       |     |      |     |                   |      |     |      |     |  |
|------------|------------------------------------|-----------|-------------------|-------|-----|------|-----|-------------------|------|-----|------|-----|--|
|            |                                    |           | MH                |       |     |      |     | PM                |      |     |      |     |  |
|            |                                    |           | treatment success |       |     |      | ALL | treatment success |      |     |      | ALL |  |
|            |                                    |           | NO                |       | YES |      |     | NO                |      | YES |      |     |  |
|            |                                    |           | n                 | %     | n   | %    | n   | n                 | %    | n   | %    | n   |  |
| period     | Bovine Parainfluenza 3 (qPCR-BPI3) | resistant |                   |       |     |      |     |                   |      |     |      |     |  |
| First Pull | Negative                           | NO        | 1                 | 33.3  | 2   | 66.7 | 3   | 6                 | 46.2 | 7   | 53.8 | 13  |  |
|            |                                    | YES       | 40                | 46.0  | 47  | 54.0 | 87  | 8                 | 57.1 | 6   | 42.9 | 14  |  |
|            |                                    | ALL       | 41                | 45.6  | 49  | 54.4 | 90  | 14                | 51.9 | 13  | 48.1 | 27  |  |
|            | Positive                           | resistant |                   |       |     |      |     |                   |      |     |      |     |  |
|            |                                    | NO        | 3                 | 100.0 | 0   | 0    | 3   | 2                 | 66.7 | 1   | 33.3 | 3   |  |
|            |                                    | YES       | 25                | 58.1  | 18  | 41.9 | 43  | 1                 | 50.0 | 1   | 50.0 | 2   |  |
|            |                                    | ALL       | 28                | 60.9  | 18  | 39.1 | 46  | 3                 | 60.0 | 2   | 40.0 | 5   |  |

STUDY: A131R-US-13-231

TREATMENT SUCCESS RATE

SUMMARY BY VIRAL EXPOSURE AND RESISTANCE OF BACTERIAL ISOLATES AT FIRST PULL

treatment=T01 test material=DRAXXIN

|            |                                                    |           | microorganism     |       |     |      |                   |    |      |     |      |    |
|------------|----------------------------------------------------|-----------|-------------------|-------|-----|------|-------------------|----|------|-----|------|----|
|            |                                                    |           | MH                |       |     |      |                   | PM |      |     |      |    |
|            |                                                    |           | treatment success |       |     | ALL  | treatment success |    |      | ALL |      |    |
|            |                                                    |           | NO                |       | YES |      | NO                |    | YES  |     |      |    |
|            |                                                    |           | n                 | %     | n   | %    | n                 | n  | %    | n   | %    | n  |
| period     | Bovine Respiratory Syncytial Virus (qPCR-BRSV-PCR) | resistant |                   |       |     |      |                   |    |      |     |      |    |
| First Pull | Negative                                           | NO        | 2                 | 100.0 | 0   | 0    | 2                 | 4  | 50.0 | 4   | 50.0 | 8  |
|            |                                                    | YES       | 28                | 45.2  | 34  | 54.8 | 62                | 5  | 45.5 | 6   | 54.5 | 11 |
|            |                                                    | ALL       | 30                | 46.9  | 34  | 53.1 | 64                | 9  | 47.4 | 10  | 52.6 | 19 |
|            | Positive                                           | resistant |                   |       |     |      |                   |    |      |     |      |    |
|            |                                                    | NO        | 2                 | 50.0  | 2   | 50.0 | 4                 | 4  | 50.0 | 4   | 50.0 | 8  |
|            |                                                    | YES       | 37                | 54.4  | 31  | 45.6 | 68                | 4  | 80.0 | 1   | 20.0 | 5  |
|            |                                                    | ALL       | 39                | 54.2  | 33  | 45.8 | 72                | 8  | 61.5 | 5   | 38.5 | 13 |

STUDY: A131R-US-13-231

TREATMENT SUCCESS RATE

SUMMARY BY VIRAL EXPOSURE AND RESISTANCE OF BACTERIAL ISOLATES AT FIRST PULL

treatment=T01 test material=DRAXXIN

|            |                                      |           | microorganism     |      |     |      |     |                   |      |     |       |     |
|------------|--------------------------------------|-----------|-------------------|------|-----|------|-----|-------------------|------|-----|-------|-----|
|            |                                      |           | MH                |      |     |      |     | PM                |      |     |       |     |
|            |                                      |           | treatment success |      |     |      |     | treatment success |      |     |       |     |
|            |                                      |           | NO                |      | YES |      | ALL | NO                |      | YES |       | ALL |
|            |                                      |           | n                 | %    | n   | %    | n   | n                 | %    | n   | %     | n   |
| period     | Bovine Viral Diarrhea (qPCR-BVD-PCR) | resistant |                   |      |     |      |     |                   |      |     |       |     |
| First Pull | Negative                             | NO        | 3                 | 75.0 | 1   | 25.0 | 4   | 8                 | 53.3 | 7   | 46.7  | 15  |
|            |                                      | YES       | 50                | 46.7 | 57  | 53.3 | 107 | 9                 | 64.3 | 5   | 35.7  | 14  |
|            |                                      | ALL       | 53                | 47.7 | 58  | 52.3 | 111 | 17                | 58.6 | 12  | 41.4  | 29  |
|            | Positive                             | resistant |                   |      |     |      |     |                   |      |     |       |     |
|            |                                      | NO        | 1                 | 50.0 | 1   | 50.0 | 2   | 0                 | 0    | 1   | 100.0 | 1   |
|            |                                      | YES       | 15                | 65.2 | 8   | 34.8 | 23  | 0                 | 0    | 2   | 100.0 | 2   |
|            |                                      | ALL       | 16                | 64.0 | 9   | 36.0 | 25  | 0                 | 0    | 3   | 100.0 | 3   |

STUDY: A131R-US-13-231

TREATMENT SUCCESS RATE

SUMMARY BY VIRAL EXPOSURE AND RESISTANCE OF BACTERIAL ISOLATES AT FIRST PULL

treatment=T01 test material=DRAXXIN

|            |                                                  |           | microorganism     |       |     |      |     |                   |       |     |      |     |
|------------|--------------------------------------------------|-----------|-------------------|-------|-----|------|-----|-------------------|-------|-----|------|-----|
|            |                                                  |           | MH                |       |     |      |     | PM                |       |     |      |     |
|            |                                                  |           | treatment success |       |     |      | ALL | treatment success |       |     |      | ALL |
|            |                                                  |           | NO                |       | YES |      |     | NO                |       | YES |      |     |
|            |                                                  |           | n                 | %     | n   | %    | n   | n                 | %     | n   | %    | n   |
| period     | Infectious Bovine Rhinotracheitis (qPCR-IBR-BHV) | resistant |                   |       |     |      |     |                   |       |     |      |     |
| First Pull | Negative                                         | NO        | 3                 | 60.0  | 2   | 40.0 | 5   | 6                 | 42.9  | 8   | 57.1 | 14  |
|            |                                                  | YES       | 54                | 47.4  | 60  | 52.6 | 114 | 7                 | 58.3  | 5   | 41.7 | 12  |
|            |                                                  | ALL       | 57                | 47.9  | 62  | 52.1 | 119 | 13                | 50.0  | 13  | 50.0 | 26  |
|            | Positive                                         | resistant |                   |       |     |      |     |                   |       |     |      |     |
|            |                                                  | NO        | 1                 | 100.0 | 0   | 0    | 1   | 2                 | 100.0 | 0   | 0    | 2   |
|            |                                                  | YES       | 11                | 68.8  | 5   | 31.3 | 16  | 2                 | 50.0  | 2   | 50.0 | 4   |
|            |                                                  | ALL       | 12                | 70.6  | 5   | 29.4 | 17  | 4                 | 66.7  | 2   | 33.3 | 6   |



STUDY: A131R-US-13-231

TREATMENT SUCCESS RATE

SUMMARY BY SUSCEPTIBILITY OF BACTERIAL ISOLATES AND PERIOD

treatment=T01 test material=DRAXXIN

|         |               |             | treatment success |       |      |       | ALL  |
|---------|---------------|-------------|-------------------|-------|------|-------|------|
|         |               |             | NO                |       | YES  |       |      |
|         |               |             | n                 | %     | n    | %     | n    |
| period  | microorganism | susceptible |                   |       |      |       |      |
| Arrival | MH            | NO          | 3                 | 33.3  | 6    | 66.7  | 9    |
|         |               | YES         | 52                | 50.5  | 51   | 49.5  | 103  |
|         |               | ALL         | 55                | 49.1  | 57   | 50.9  | 112  |
|         | PM            | susceptible |                   |       |      |       |      |
|         |               | NO          | 0                 | 0     | 2    | 100.0 | 2    |
|         |               | YES         | 45                | 42.9  | 60   | 57.1  | 105  |
|         |               | ALL         | 45                | 42.1  | 62   | 57.9  | 107  |
|         | First Pull    | MH          | susceptible       |       |      |       |      |
|         |               |             | NO                | 66    | 49.6 | 67    | 50.4 |
| YES     |               |             | 3                 | 100.0 | 0    | 0     | 3    |
| ALL     |               |             | 69                | 50.7  | 67   | 49.3  | 136  |
| PM      |               | susceptible |                   |       |      |       |      |
|         |               | NO          | 12                | 60.0  | 8    | 40.0  | 20   |
|         |               | YES         | 5                 | 41.7  | 7    | 58.3  | 12   |
|         |               | ALL         | 17                | 53.1  | 15   | 46.9  | 32   |

STUDY: A131R-US-13-231

TREATMENT SUCCESS RATE

SUMMARY BY SUSCEPTIBILITY OF BACTERIAL ISOLATES AND PERIOD  
 SENSITIVITY, SPECIFICITY, POSITIVE PREDICTIVE VALUE AND NEGATIVE PREDICTIVE VALUE

treatment=T01 test material=DRAXXIN

| period     | microorganism | sensitivity | specificity | positive predictive value | negative predictive value |
|------------|---------------|-------------|-------------|---------------------------|---------------------------|
| Arrival    | MH            | 0.895       | 0.055       | 0.495                     | 0.333                     |
|            | PM            | 0.968       | 0.000       | 0.571                     | 0.000                     |
| First Pull | MH            | 0.000       | 0.957       | 0.000                     | 0.496                     |
|            | PM            | 0.467       | 0.706       | 0.583                     | 0.600                     |

SUMMARY BY TIME OF ARRIVAL ON STUDY, SUSCEPTIBILITY OF BACTERIAL ISOLATES AND PERIOD

treatment=T01 test material=DRAXXIN

|         |             |             | microorganism     |       |       |       |    |      |                   |      |       |    |  |
|---------|-------------|-------------|-------------------|-------|-------|-------|----|------|-------------------|------|-------|----|--|
|         |             |             | MH                |       |       |       |    | PM   |                   |      |       |    |  |
|         |             |             | treatment success |       |       |       |    | ALL  | treatment success |      |       |    |  |
|         |             |             | NO                |       | YES   |       | NO |      | YES               |      | ALL   |    |  |
|         |             |             | n                 | %     | n     | %     | n  | n    | %                 | n    | %     | n  |  |
| period  | day 0 date  | susceptible |                   |       |       |       |    |      |                   |      |       |    |  |
| Arrival | 06MAR15     | YES         | 6                 | 66.7  | 3     | 33.3  | 9  | 9    | 64.3              | 5    | 35.7  | 14 |  |
|         |             | ALL         | 6                 | 66.7  | 3     | 33.3  | 9  | 9    | 64.3              | 5    | 35.7  | 14 |  |
|         | 13MAR15     | susceptible |                   |       |       |       |    |      |                   |      |       |    |  |
|         |             | YES         | 18                | 54.5  | 15    | 45.5  | 33 | 12   | 48.0              | 13   | 52.0  | 25 |  |
|         |             | ALL         | 18                | 54.5  | 15    | 45.5  | 33 | 12   | 48.0              | 13   | 52.0  | 25 |  |
|         | 20MAR15     | susceptible |                   |       |       |       |    |      |                   |      |       |    |  |
|         |             | NO          | 1                 | 100.0 | 0     | 0     | 1  | 0    | 0                 | 0    | 0     | 0  |  |
|         |             | YES         | 2                 | 28.6  | 5     | 71.4  | 7  | 6    | 30.0              | 14   | 70.0  | 20 |  |
|         |             | ALL         | 3                 | 37.5  | 5     | 62.5  | 8  | 6    | 30.0              | 14   | 70.0  | 20 |  |
|         | 23MAR15     | susceptible |                   |       |       |       |    |      |                   |      |       |    |  |
|         |             | NO          | 2                 | 28.6  | 5     | 71.4  | 7  | 0    | 0                 | 1    | 100.0 | 1  |  |
|         |             | YES         | 20                | 57.1  | 15    | 42.9  | 35 | 13   | 46.4              | 15   | 53.6  | 28 |  |
|         |             | ALL         | 22                | 52.4  | 20    | 47.6  | 42 | 13   | 44.8              | 16   | 55.2  | 29 |  |
|         | 25MAR15     | susceptible |                   |       |       |       |    |      |                   |      |       |    |  |
|         |             | YES         | 0                 | 0     | 4     | 100.0 | 4  | 1    | 14.3              | 6    | 85.7  | 7  |  |
|         |             | ALL         | 0                 | 0     | 4     | 100.0 | 4  | 1    | 14.3              | 6    | 85.7  | 7  |  |
|         | 26MAR15     | susceptible |                   |       |       |       |    |      |                   |      |       |    |  |
|         |             | NO          | 0                 | 0     | 0     | 0     | 0  | 0    | 0                 | 1    | 100.0 | 1  |  |
|         |             | YES         | 0                 | 0     | 3     | 100.0 | 3  | 1    | 25.0              | 3    | 75.0  | 4  |  |
|         |             | ALL         | 0                 | 0     | 3     | 100.0 | 3  | 1    | 20.0              | 4    | 80.0  | 5  |  |
| 27MAR15 | susceptible |             |                   |       |       |       |    |      |                   |      |       |    |  |
|         | NO          | 0           | 0                 | 1     | 100.0 | 1     | 0  | 0    | 0                 | 0    | 0     |    |  |
|         | YES         | 1           | 25.0              | 3     | 75.0  | 4     | 2  | 66.7 | 1                 | 33.3 | 3     |    |  |

(Continued)

STUDY: A131R-US-13-231

TREATMENT SUCCESS RATE

SUMMARY BY TIME OF ARRIVAL ON STUDY, SUSCEPTIBILITY OF BACTERIAL ISOLATES AND PERIOD

treatment=T01 test material=DRAXXIN

|            |             |             | microorganism     |       |      |       |    |      |                   |      |       |   |  |
|------------|-------------|-------------|-------------------|-------|------|-------|----|------|-------------------|------|-------|---|--|
|            |             |             | MH                |       |      |       |    | PM   |                   |      |       |   |  |
|            |             |             | treatment success |       |      |       |    | ALL  | treatment success |      |       |   |  |
|            |             |             | NO                |       | YES  |       | NO |      | YES               |      | ALL   |   |  |
|            |             |             | n                 | %     | n    | %     | n  | n    | %                 | n    | %     | n |  |
| period     | day 0 date  | susceptible |                   |       |      |       |    |      |                   |      |       |   |  |
| Arrival    | 27MAR15     | ALL         | 1                 | 20.0  | 4    | 80.0  | 5  | 2    | 66.7              | 1    | 33.3  | 3 |  |
|            |             | susceptible |                   |       |      |       |    |      |                   |      |       |   |  |
|            |             | YES         | 5                 | 62.5  | 3    | 37.5  | 8  | 1    | 25.0              | 3    | 75.0  | 4 |  |
|            |             | ALL         | 5                 | 62.5  | 3    | 37.5  | 8  | 1    | 25.0              | 3    | 75.0  | 4 |  |
| First Pull | 06MAR15     | susceptible |                   |       |      |       |    |      |                   |      |       |   |  |
|            |             | NO          | 0                 | 0     | 2    | 100.0 | 2  | 0    | 0                 | 1    | 100.0 | 1 |  |
|            |             | YES         | 2                 | 100.0 | 0    | 0     | 2  | 0    | 0                 | 0    | 0     | 0 |  |
|            |             | ALL         | 2                 | 50.0  | 2    | 50.0  | 4  | 0    | 0                 | 1    | 100.0 | 1 |  |
|            | 13MAR15     | susceptible |                   |       |      |       |    |      |                   |      |       |   |  |
|            |             | NO          | 10                | 37.0  | 17   | 63.0  | 27 | 1    | 33.3              | 2    | 66.7  | 3 |  |
|            |             | YES         | 1                 | 100.0 | 0    | 0     | 1  | 2    | 66.7              | 1    | 33.3  | 3 |  |
|            |             | ALL         | 11                | 39.3  | 17   | 60.7  | 28 | 3    | 50.0              | 3    | 50.0  | 6 |  |
|            | 20MAR15     | susceptible |                   |       |      |       |    |      |                   |      |       |   |  |
|            |             | NO          | 13                | 59.1  | 9    | 40.9  | 22 | 2    | 66.7              | 1    | 33.3  | 3 |  |
|            |             | YES         | 0                 | 0     | 0    | 0     | 0  | 2    | 50.0              | 2    | 50.0  | 4 |  |
|            |             | ALL         | 13                | 59.1  | 9    | 40.9  | 22 | 4    | 57.1              | 3    | 42.9  | 7 |  |
|            | 23MAR15     | susceptible |                   |       |      |       |    |      |                   |      |       |   |  |
|            |             | NO          | 12                | 63.2  | 7    | 36.8  | 19 | 4    | 66.7              | 2    | 33.3  | 6 |  |
|            |             | YES         | 0                 | 0     | 0    | 0     | 0  | 0    | 0                 | 1    | 100.0 | 1 |  |
|            |             | ALL         | 12                | 63.2  | 7    | 36.8  | 19 | 4    | 57.1              | 3    | 42.9  | 7 |  |
| 25MAR15    | susceptible |             |                   |       |      |       |    |      |                   |      |       |   |  |
|            | NO          | 6           | 42.9              | 8     | 57.1 | 14    | 0  | 0    | 0                 | 0    | 0     |   |  |
|            | YES         | 0           | 0                 | 0     | 0    | 0     | 1  | 50.0 | 1                 | 50.0 | 2     |   |  |

(Continued)

STUDY: A131R-US-13-231

TREATMENT SUCCESS RATE

SUMMARY BY TIME OF ARRIVAL ON STUDY, SUSCEPTIBILITY OF BACTERIAL ISOLATES AND PERIOD

treatment=T01 test material=DRAXXIN

|            |            |             | microorganism     |      |     |      |    |     |                   |   |       |   |  |
|------------|------------|-------------|-------------------|------|-----|------|----|-----|-------------------|---|-------|---|--|
|            |            |             | MH                |      |     |      |    | PM  |                   |   |       |   |  |
|            |            |             | treatment success |      |     |      |    | ALL | treatment success |   |       |   |  |
|            |            |             | NO                |      | YES |      | NO |     | YES               |   | ALL   |   |  |
|            |            |             | n                 | %    | n   | %    | n  | n   | %                 | n | %     | n |  |
| period     | day 0 date | susceptible |                   |      |     |      |    |     |                   |   |       |   |  |
| First Pull | 25MAR15    | ALL         | 6                 | 42.9 | 8   | 57.1 | 14 | 1   | 50.0              | 1 | 50.0  | 2 |  |
|            | 26MAR15    | susceptible |                   |      |     |      |    |     |                   |   |       |   |  |
|            |            | NO          | 7                 | 53.8 | 6   | 46.2 | 13 | 1   | 100.0             | 0 | 0     | 1 |  |
|            |            | ALL         | 7                 | 53.8 | 6   | 46.2 | 13 | 1   | 100.0             | 0 | 0     | 1 |  |
|            | 27MAR15    | susceptible |                   |      |     |      |    |     |                   |   |       |   |  |
|            |            | NO          | 8                 | 57.1 | 6   | 42.9 | 14 | 2   | 50.0              | 2 | 50.0  | 4 |  |
|            |            | YES         | 0                 | 0    | 0   | 0    | 0  | 0   | 0                 | 1 | 100.0 | 1 |  |
|            |            | ALL         | 8                 | 57.1 | 6   | 42.9 | 14 | 2   | 40.0              | 3 | 60.0  | 5 |  |
|            | 28MAR15    | susceptible |                   |      |     |      |    |     |                   |   |       |   |  |
|            |            | NO          | 10                | 45.5 | 12  | 54.5 | 22 | 2   | 100.0             | 0 | 0     | 2 |  |
|            |            | YES         | 0                 | 0    | 0   | 0    | 0  | 0   | 0                 | 1 | 100.0 | 1 |  |
|            |            | ALL         | 10                | 45.5 | 12  | 54.5 | 22 | 2   | 66.7              | 1 | 33.3  | 3 |  |

STUDY: A131R-US-13-231

TREATMENT SUCCESS RATE

SUMMARY BY VIRAL EXPOSURE AND SUSCEPTIBILITY OF BACTERIAL ISOLATES AT FIRST PULL

treatment=T01 test material=DRAXXIN

|            |                                    |             | microorganism     |       |     |      |     |                   |       |     |      |     |  |
|------------|------------------------------------|-------------|-------------------|-------|-----|------|-----|-------------------|-------|-----|------|-----|--|
|            |                                    |             | MH                |       |     |      |     | PM                |       |     |      |     |  |
|            |                                    |             | treatment success |       |     |      | ALL | treatment success |       |     |      | ALL |  |
|            |                                    |             | NO                |       | YES |      |     | NO                |       | YES |      |     |  |
|            |                                    |             | n                 | %     | n   | %    | n   | n                 | %     | n   | %    | n   |  |
| period     | Bovine Parainfluenza 3 (qPCR-BPI3) | susceptible |                   |       |     |      |     |                   |       |     |      |     |  |
| First Pull | Negative                           | NO          | 40                | 44.9  | 49  | 55.1 | 89  | 10                | 62.5  | 6   | 37.5 | 16  |  |
|            |                                    | YES         | 1                 | 100.0 | 0   | 0    | 1   | 4                 | 36.4  | 7   | 63.6 | 11  |  |
|            |                                    | ALL         | 41                | 45.6  | 49  | 54.4 | 90  | 14                | 51.9  | 13  | 48.1 | 27  |  |
|            | Positive                           | susceptible |                   |       |     |      |     |                   |       |     |      |     |  |
|            |                                    | NO          | 26                | 59.1  | 18  | 40.9 | 44  | 2                 | 50.0  | 2   | 50.0 | 4   |  |
|            |                                    | YES         | 2                 | 100.0 | 0   | 0    | 2   | 1                 | 100.0 | 0   | 0    | 1   |  |
|            |                                    | ALL         | 28                | 60.9  | 18  | 39.1 | 46  | 3                 | 60.0  | 2   | 40.0 | 5   |  |

STUDY: A131R-US-13-231

TREATMENT SUCCESS RATE

SUMMARY BY VIRAL EXPOSURE AND SUSCEPTIBILITY OF BACTERIAL ISOLATES AT FIRST PULL

treatment=T01 test material=DRAXXIN

|            |                                                    |             | microorganism     |       |     |      |     |                   |      |     |      |     |
|------------|----------------------------------------------------|-------------|-------------------|-------|-----|------|-----|-------------------|------|-----|------|-----|
|            |                                                    |             | MH                |       |     |      |     | PM                |      |     |      |     |
|            |                                                    |             | treatment success |       |     |      |     | treatment success |      |     |      |     |
|            |                                                    |             | NO                |       | YES |      | ALL | NO                |      | YES |      | ALL |
|            |                                                    |             | n                 | %     | n   | %    | n   | n                 | %    | n   | %    | n   |
| period     | Bovine Respiratory Syncytial Virus (qPCR-BRSV-PCR) | susceptible |                   |       |     |      |     |                   |      |     |      |     |
| First Pull | Negative                                           | NO          | 29                | 46.0  | 34  | 54.0 | 63  | 6                 | 46.2 | 7   | 53.8 | 13  |
|            |                                                    | YES         | 1                 | 100.0 | 0   | 0    | 1   | 3                 | 50.0 | 3   | 50.0 | 6   |
|            |                                                    | ALL         | 30                | 46.9  | 34  | 53.1 | 64  | 9                 | 47.4 | 10  | 52.6 | 19  |
|            | Positive                                           | susceptible |                   |       |     |      |     |                   |      |     |      |     |
|            |                                                    | NO          | 37                | 52.9  | 33  | 47.1 | 70  | 6                 | 85.7 | 1   | 14.3 | 7   |
|            |                                                    | YES         | 2                 | 100.0 | 0   | 0    | 2   | 2                 | 33.3 | 4   | 66.7 | 6   |
|            |                                                    | ALL         | 39                | 54.2  | 33  | 45.8 | 72  | 8                 | 61.5 | 5   | 38.5 | 13  |

STUDY: A131R-US-13-231

TREATMENT SUCCESS RATE

SUMMARY BY VIRAL EXPOSURE AND SUSCEPTIBILITY OF BACTERIAL ISOLATES AT FIRST PULL

treatment=T01 test material=DRAXXIN

|            |                                      |             | microorganism     |       |     |                   |     |    |      |     |       |     |  |
|------------|--------------------------------------|-------------|-------------------|-------|-----|-------------------|-----|----|------|-----|-------|-----|--|
|            |                                      |             | MH                |       |     |                   |     | PM |      |     |       |     |  |
|            |                                      |             | treatment success |       |     | treatment success |     |    | ALL  |     |       |     |  |
|            |                                      |             | NO                |       | YES |                   | ALL | NO |      | YES |       | ALL |  |
|            |                                      |             | n                 | %     | n   | %                 | n   | n  | %    | n   | %     | n   |  |
| period     | Bovine Viral Diarrhea (qPCR-BVD-PCR) | susceptible |                   |       |     |                   |     |    |      |     |       |     |  |
| First Pull | Negative                             | NO          | 51                | 46.8  | 58  | 53.2              | 109 | 12 | 70.6 | 5   | 29.4  | 17  |  |
|            |                                      | YES         | 2                 | 100.0 | 0   | 0                 | 2   | 5  | 41.7 | 7   | 58.3  | 12  |  |
|            |                                      | ALL         | 53                | 47.7  | 58  | 52.3              | 111 | 17 | 58.6 | 12  | 41.4  | 29  |  |
|            | Positive                             | susceptible |                   |       |     |                   |     |    |      |     |       |     |  |
|            |                                      | NO          | 15                | 62.5  | 9   | 37.5              | 24  | 0  | 0    | 3   | 100.0 | 3   |  |
|            |                                      | YES         | 1                 | 100.0 | 0   | 0                 | 1   | 0  | 0    | 0   | 0     | 0   |  |
|            |                                      | ALL         | 16                | 64.0  | 9   | 36.0              | 25  | 0  | 0    | 3   | 100.0 | 3   |  |



STUDY: A131R-US-13-231

TREATMENT SUCCESS RATE

SUMMARY BY VIRAL EXPOSURE AND SUSCEPTIBILITY OF BACTERIAL ISOLATES AT FIRST PULL

treatment=T01 test material=DRAXXIN

|            |                                                  |             | microorganism     |       |     |      |     |                   |      |     |      |     |  |
|------------|--------------------------------------------------|-------------|-------------------|-------|-----|------|-----|-------------------|------|-----|------|-----|--|
|            |                                                  |             | MH                |       |     |      |     | PM                |      |     |      |     |  |
|            |                                                  |             | treatment success |       |     |      |     | treatment success |      |     |      |     |  |
|            |                                                  |             | NO                |       | YES |      | ALL | NO                |      | YES |      | ALL |  |
|            |                                                  |             | n                 | %     | n   | %    | n   | n                 | %    | n   | %    | n   |  |
| period     | Infectious Bovine Rhinotracheitis (qPCR-IBR-BHV) | susceptible |                   |       |     |      |     |                   |      |     |      |     |  |
| First Pull | Negative                                         | NO          | 55                | 47.0  | 62  | 53.0 | 117 | 8                 | 57.1 | 6   | 42.9 | 14  |  |
|            |                                                  | YES         | 2                 | 100.0 | 0   | 0    | 2   | 5                 | 41.7 | 7   | 58.3 | 12  |  |
|            |                                                  | ALL         | 57                | 47.9  | 62  | 52.1 | 119 | 13                | 50.0 | 13  | 50.0 | 26  |  |
|            | Positive                                         | susceptible |                   |       |     |      |     |                   |      |     |      |     |  |
|            |                                                  | NO          | 11                | 68.8  | 5   | 31.3 | 16  | 4                 | 66.7 | 2   | 33.3 | 6   |  |
|            |                                                  | YES         | 1                 | 100.0 | 0   | 0    | 1   | 0                 | 0    | 0   | 0    | 0   |  |
|            |                                                  | ALL         | 12                | 70.6  | 5   | 29.4 | 17  | 4                 | 66.7 | 2   | 33.3 | 6   |  |

PHASE IV ALL SPECIES STUDY BOVINE  
 STUDY: A131R-US-13-231  
 TREATMENT SUCCESS RATE  
 SUMMARY OF MIC BY PERIOD

09:30 Tuesday, October 27, 2015 121

treatment=T01 test material=DRAXXIN

|            |               | mic    |     |      |      |     |      |    |      |    |      |    |      |   |     |    |      |    |      |    |     | ALL |      |     |
|------------|---------------|--------|-----|------|------|-----|------|----|------|----|------|----|------|---|-----|----|------|----|------|----|-----|-----|------|-----|
|            |               | <=0.12 |     | 0.25 |      | 0.5 |      | 1  |      | 2  |      | 4  |      | 8 |     | 16 |      | 32 |      | 64 |     |     | >64  |     |
|            |               | n      | %   | n    | %    | n   | %    | n  | %    | n  | %    | n  | %    | n | %   | n  | %    | n  | %    | n  | %   |     | n    | %   |
| period     | microorganism |        |     |      |      |     |      |    |      |    |      |    |      |   |     |    |      |    |      |    |     |     |      |     |
| Arrival    | PM            | 4      | 3.7 | 22   | 20.6 | 64  | 59.8 | 10 | 9.3  | 2  | 1.9  | 0  | 0    | 1 | 0.9 | 2  | 1.9  | 0  | 0    | 1  | 0.9 | 1   | 0.9  | 107 |
|            | MH            | 0      | 0   | 0    | 0    | 6   | 5.4  | 44 | 39.3 | 33 | 29.5 | 18 | 16.1 | 0 | 0   | 2  | 1.8  | 7  | 6.3  | 0  | 0   | 2   | 1.8  | 112 |
| First Pull | PM            | 0      | 0   | 1    | 3.1  | 4   | 12.5 | 1  | 3.1  | 0  | 0    | 0  | 0    | 1 | 3.1 | 5  | 15.6 | 4  | 12.5 | 0  | 0   | 16  | 50.0 | 32  |
|            | MH            | 0      | 0   | 0    | 0    | 0   | 0    | 0  | 0    | 1  | 0.7  | 2  | 1.5  | 0 | 0   | 0  | 0    | 3  | 2.2  | 0  | 0   | 130 | 95.6 | 136 |

DATA HAVE NOT BEEN VERIFIED
